# Supplementary material for: High-precision geochronology confirms voluminous magmatism before, during, and after Earth’s most severe extinction
Source: PubMed Central journal article supplement — Sci Adv. 2015 Aug 28;1(7):e1500470. doi: 10.1126/sciadv.1500470 (PMC4643808; doi:10.1126/sciadv.1500470), 2015-08-28
Supplement: 1500470_SM.pdf [file 1500470_SM.pdf]

## Supplementary Materials for **High-precision geochronology confirms voluminous magmatism before, during, and after Earth's most severe extinction**

Seth D. Burgess and Samuel A. Bowring

Published 28 August 2015, *Sci. Adv.* **1**, e1500470 (2015)

DOI: 10.1126/sciadv.1500470

### **The PDF file includes:**

Fig. S1. Perovskite and clinopyroxene isochrons for sample K08-14-3.

Fig. S2. Perovskite and clinopyroxene isochrons for sample K09-6-1.

Fig. S3. Perovskite and clinopyroxene isochrons for sample K09-6-2.

Fig. S4. Nickel concentration in the Noril'sk lava stratigraphy.

Table S1. LA-ICPMS zircon data for Siberian Traps LIP pyroclastic rocks and lavas.

Legend for table S2

### **Other Supplementary Material for this manuscript includes the following:**

(available at [www.advances.sciencemag.org/cgi/content/full/1/7/e1500470/DC1](http://www.advances.sciencemag.org/cgi/content/full/1/7/e1500470/DC1))

Table S2 (Microsoft Excel format). Zircon and perovskite U/Pb isotopic data and calculated dates.

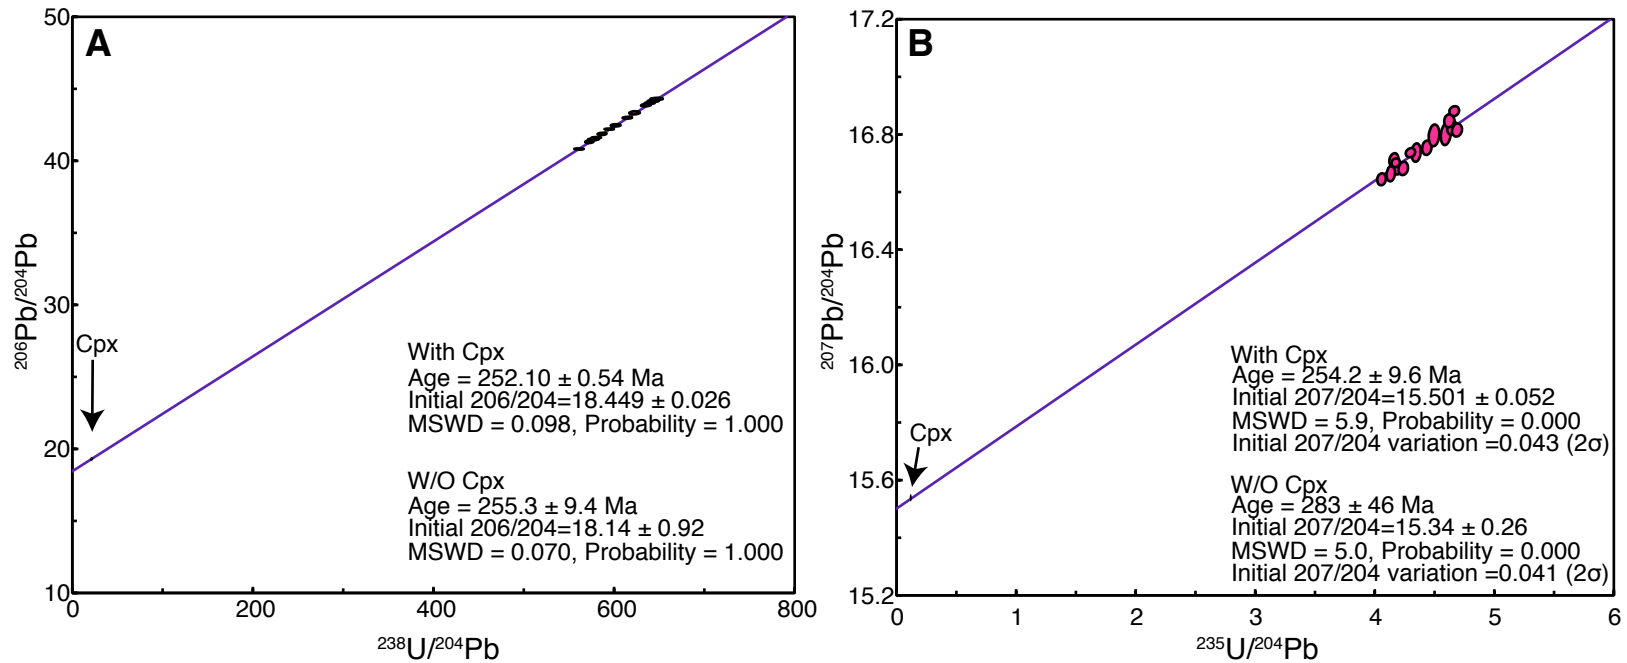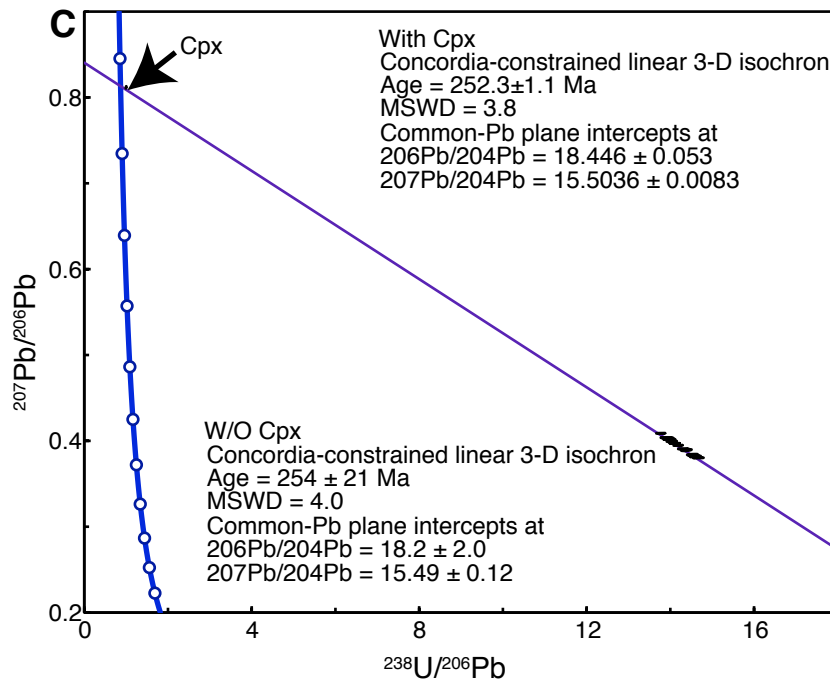

Figure S1. Perovskite and clinopyroxene isochrons for sample K08-14-3. (A)  $^{206}\text{Pb}/^{238}\text{U}$  isochron. (B)  $^{207}\text{Pb}/^{235}\text{U}$  isochron. (C) Linear 3D isochron. All uncertainty quoted is  $2\sigma$  internal.

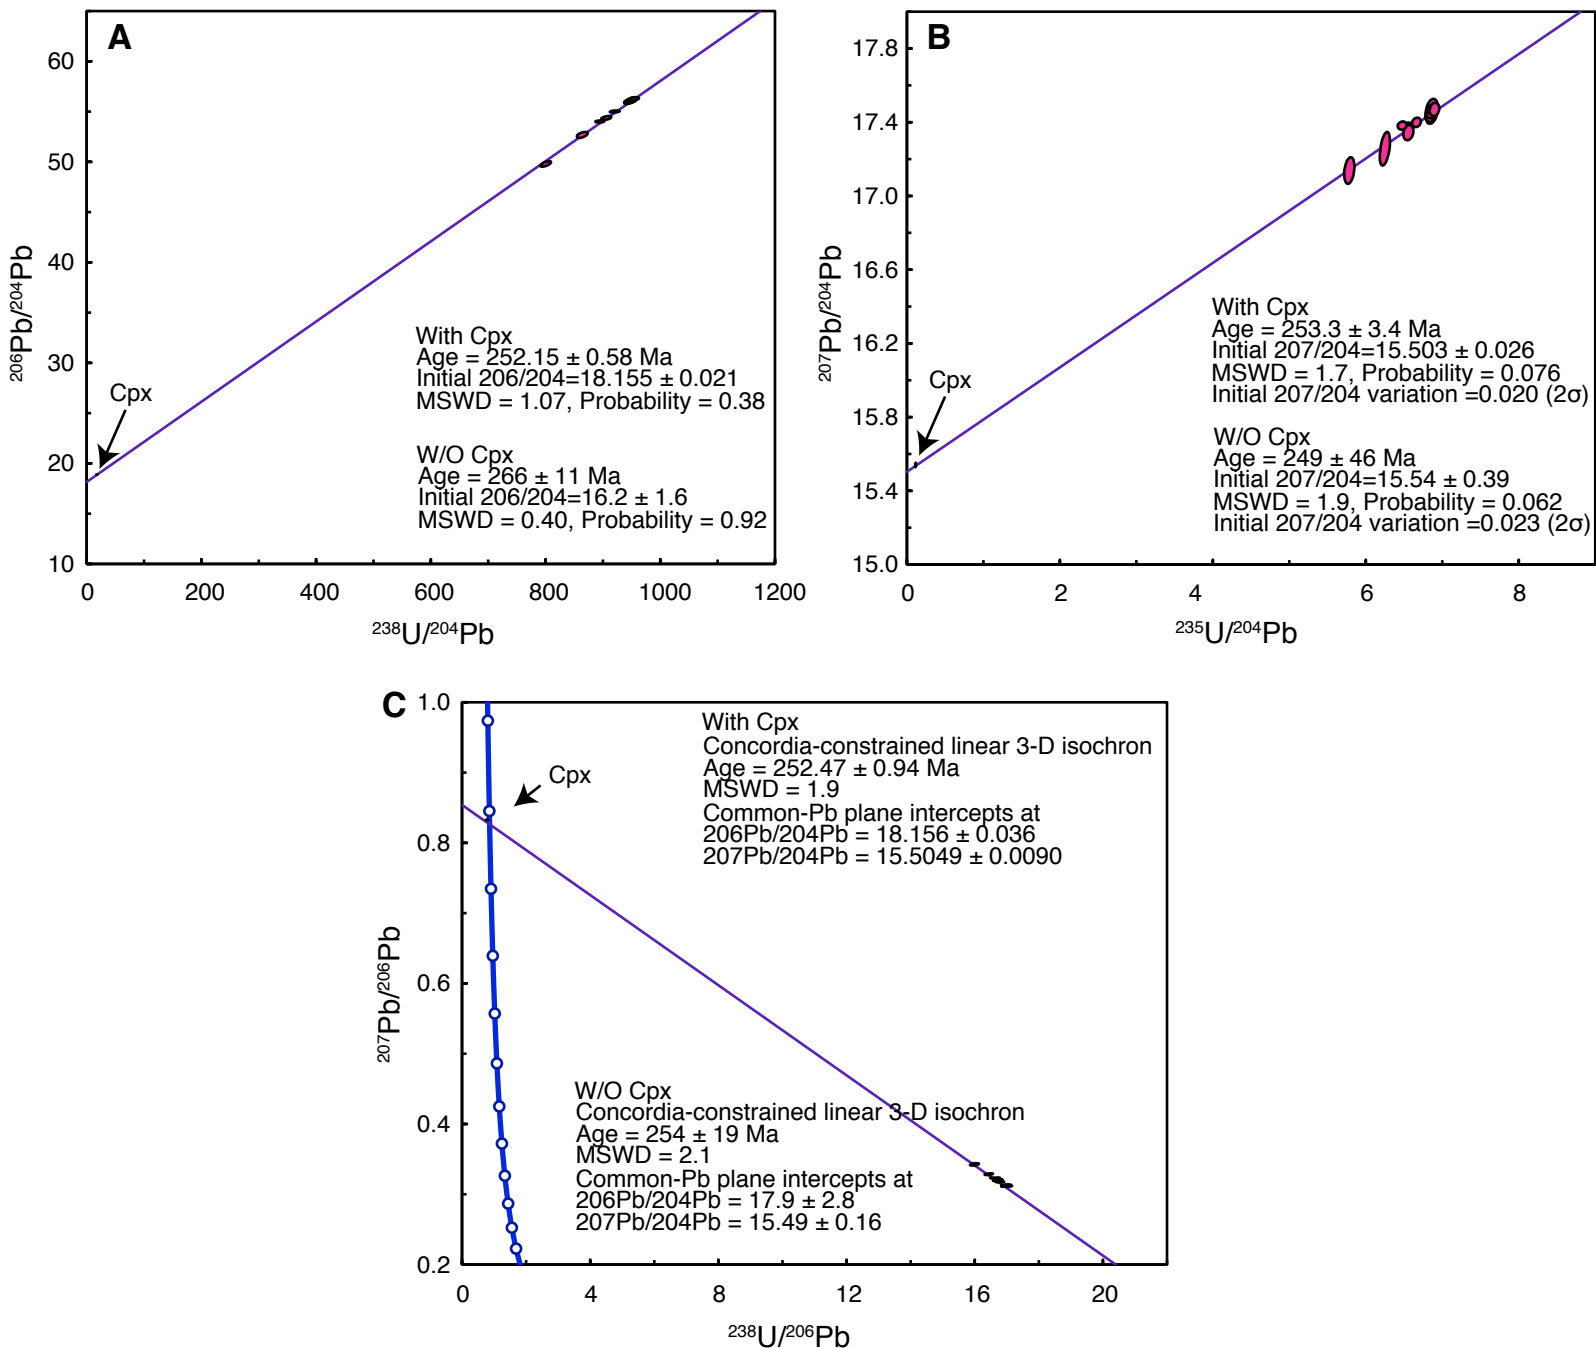

Figure S2. Perovskite and clinopyroxene isochrons for sample K09-6-1. (A)  $^{206}\text{Pb}/^{238}\text{U}$  isochron. (B)  $^{207}\text{Pb}/^{235}\text{U}$  isochron. (C) Linear 3-D isochron. All uncertainty quoted is  $2\sigma$  internal.

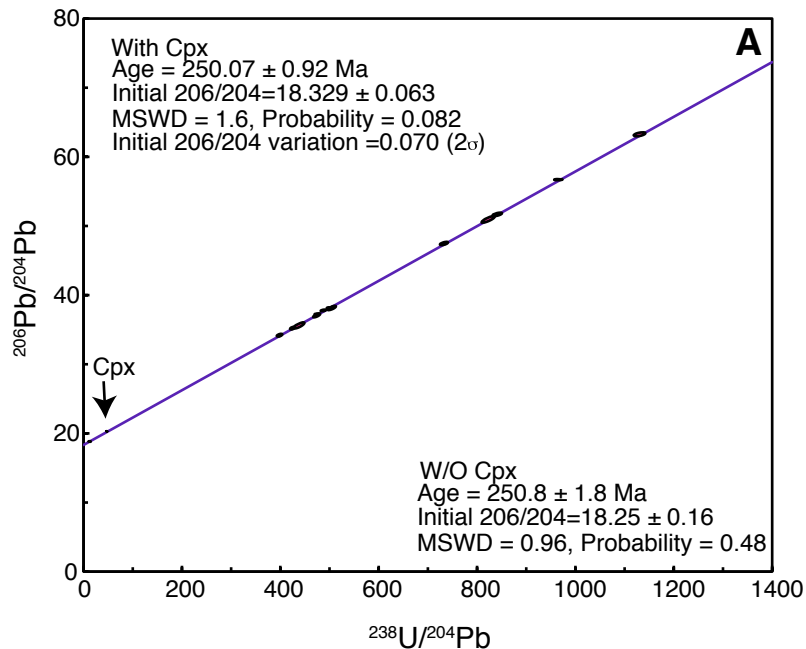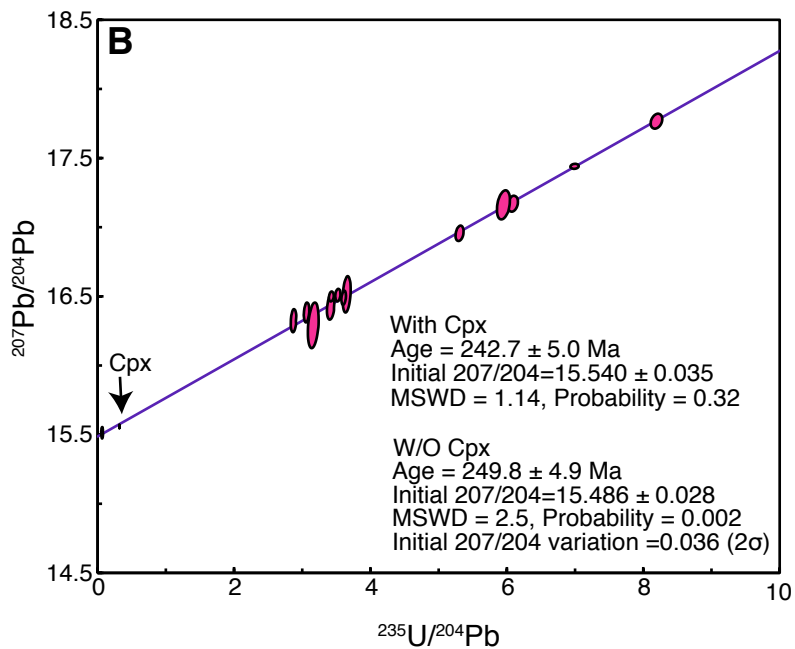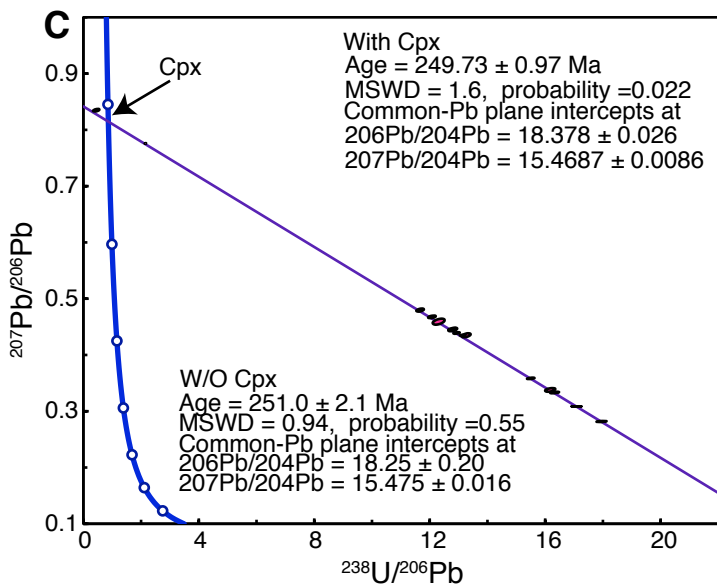

Figure S3. Perovskite and clinopyroxene isochrons for sample K09-6-2. (A)  $^{206}\text{Pb}/^{238}\text{U}$  isochron. (B)  $^{207}\text{Pb}/^{235}\text{U}$  isochron. (C) Linear 3D isochron. All uncertainty quoted is  $2\sigma$  internal.

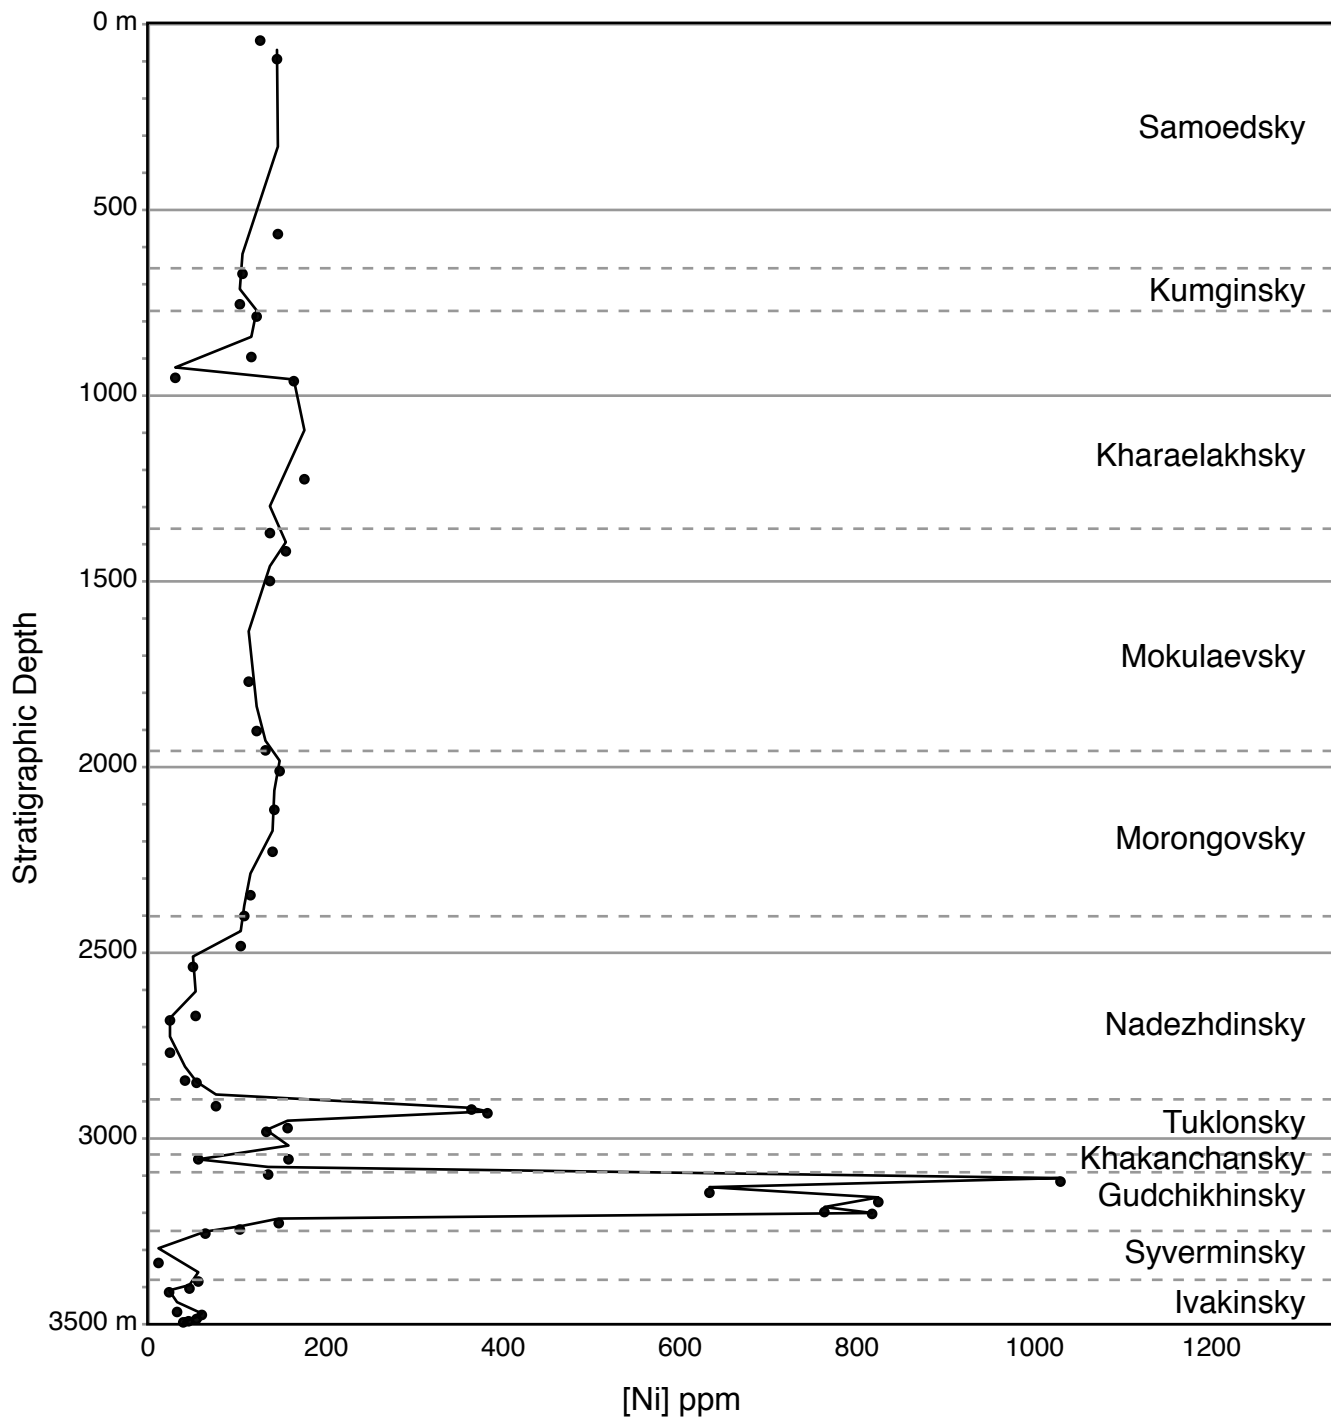

Figure S4. Nickel concentration in the Noril'sk lava stratigraphy. Nickel compositional data from (28). Noril'sk lava stratigraphy from (14).

**Table S1. LA-ICPMS zircon data for Siberian Traps LIP pyroclastic rocks and lavas.**

| Sample      | U<br>(ppm) | 206Pb<br>204Pb | U/Th | Isotope ratios            |                    |                       |      |                |                         |     | Apparent ages (Ma)     |      |                          |      |         |       |
|-------------|------------|----------------|------|---------------------------|--------------------|-----------------------|------|----------------|-------------------------|-----|------------------------|------|--------------------------|------|---------|-------|
|             |            |                |      | 206Pb*<br>207Pb* ±<br>(%) | 207Pb*<br>±<br>(%) | 206Pb*<br>238U<br>(%) | ±    | error<br>corr. | 206Pb*<br>238U*<br>(Ma) | ±   | 207Pb*<br>235U<br>(Ma) | ±    | 206Pb*<br>207Pb*<br>(Ma) | ±    |         |       |
| SG2610-4-1  | 367.4      | 9886.8         | 1.5  | 19.6                      | 2.7                | 0.3                   | 3.2  | 0.0            | 1.6                     | 0.5 | 258.9                  | 4.0  | 257.5                    | 7.2  | 244.8   | 62.8  |
| SG2610-4-5  | 373.6      | 6566.8         | 2.5  | 17.7                      | 3.0                | 0.3                   | 3.1  | 0.0            | 0.7                     | 0.2 | 264.6                  | 1.9  | 286.6                    | 7.7  | 469.8   | 66.8  |
| SG2610-4-7  | 82.1       | 7957.2         | 1.3  | 14.4                      | 5.6                | 1.1                   | 6.9  | 0.1            | 4.0                     | 0.6 | 673.6                  | 25.3 | 729.4                    | 35.7 | 905.0   | 115.8 |
| SG2610-4-8  | 375.8      | 9891.3         | 1.7  | 19.4                      | 3.3                | 0.3                   | 3.6  | 0.0            | 1.5                     | 0.4 | 268.2                  | 4.1  | 267.5                    | 8.6  | 261.8   | 75.9  |
| SG2610-4-9  | 485.4      | 47276.3        | 5.0  | 9.0                       | 0.2                | 4.5                   | 1.0  | 0.3            | 1.0                     | 1.0 | 1656.2                 | 14.7 | 1727.3                   | 8.5  | 1814.5  | 3.3   |
| SG2610-4-10 | 1045.6     | 21605.6        | 1.7  | 19.1                      | 1.1                | 0.3                   | 2.1  | 0.0            | 1.7                     | 0.8 | 271.4                  | 4.6  | 274.7                    | 4.9  | 303.2   | 25.3  |
| SG2610-4-11 | 98.2       | 5049.7         | 3.0  | 12.6                      | 1.3                | 2.3                   | 6.6  | 0.2            | 6.4                     | 1.0 | 1222.2                 | 71.5 | 1206.8                   | 46.3 | 1179.4  | 26.4  |
| SG2610-4-12 | 1345.5     | 25956.6        | 9.4  | 19.0                      | 1.0                | 0.3                   | 4.7  | 0.0            | 4.5                     | 1.0 | 284.3                  | 12.6 | 287.4                    | 11.7 | 313.0   | 23.4  |
| SG2610-4-13 | 510.7      | 6530.4         | 2.9  | 19.7                      | 1.3                | 0.3                   | 1.7  | 0.0            | 1.0                     | 0.6 | 301.8                  | 3.1  | 293.2                    | 4.2  | 225.2   | 30.1  |
| SG2610-4-14 | 494.3      | 9568.1         | 3.3  | 18.0                      | 1.1                | 0.5                   | 1.4  | 0.1            | 0.9                     | 0.7 | 430.5                  | 3.9  | 431.3                    | 5.0  | 435.5   | 23.8  |
| SG2610-4-15 | 290.7      | 34396.1        | 2.9  | 9.0                       | 0.2                | 4.9                   | 1.1  | 0.3            | 1.1                     | 1.0 | 1778.6                 | 16.9 | 1794.7                   | 9.3  | 1813.3  | 3.2   |
| SG2610-4-16 | 649.9      | 21024.1        | 2.7  | 18.7                      | 3.1                | 0.3                   | 3.7  | 0.0            | 2.1                     | 0.6 | 272.0                  | 5.5  | 280.6                    | 9.1  | 352.9   | 69.7  |
| SG2610-4-17 | 139.7      | 1935.5         | 2.0  | 21.1                      | 6.1                | 0.4                   | 6.5  | 0.1            | 2.2                     | 0.3 | 341.7                  | 7.5  | 308.8                    | 17.3 | 66.6    | 145.1 |
| SG2610-4-18 | 131.9      | 1254.5         | 3.0  | 23.7                      | 10.0               | 0.2                   | 11.0 | 0.0            | 4.6                     | 0.4 | 261.6                  | 11.9 | 219.5                    | 21.8 | -211.2  | 251.5 |
| SG2610-4-19 | 258.6      | 849.3          | 1.5  | 41.4                      | 19.3               | 0.0                   | 19.5 | 0.0            | 2.9                     | 0.1 | 74.9                   | 2.1  | 38.8                     | 7.4  | -1879.8 | 706.4 |
| SG2610-4-20 | 131.7      | 12062.4        | 2.6  | 8.1                       | 0.5                | 6.1                   | 1.4  | 0.4            | 1.3                     | 0.9 | 1970.5                 | 22.1 | 1991.4                   | 12.2 | 2013.2  | 8.8   |
| SG2610-4-21 | 435.8      | 4387.5         | 1.3  | 20.2                      | 1.5                | 0.3                   | 2.1  | 0.0            | 1.6                     | 0.7 | 270.3                  | 4.2  | 260.3                    | 4.9  | 171.1   | 33.9  |
| SG2610-4-23 | 313.8      | 5643.5         | 2.1  | 19.4                      | 3.7                | 0.3                   | 4.1  | 0.0            | 1.7                     | 0.4 | 258.5                  | 4.4  | 259.2                    | 9.4  | 265.9   | 85.6  |
| SG2610-4-24 | 291.2      | 13079.0        | 1.9  | 16.5                      | 2.6                | 0.8                   | 4.5  | 0.1            | 3.7                     | 0.8 | 555.0                  | 19.5 | 568.3                    | 19.5 | 621.7   | 55.7  |
| SG2610-4-25 | 1467.7     | 29198.2        | 2.9  | 18.8                      | 0.6                | 0.3                   | 4.3  | 0.0            | 4.3                     | 1.0 | 284.2                  | 11.9 | 290.5                    | 11.0 | 341.6   | 13.6  |
| SG2610-4-26 | 644.6      | 21512.0        | 3.3  | 15.7                      | 0.4                | 1.0                   | 0.9  | 0.1            | 0.8                     | 0.9 | 710.6                  | 5.2  | 716.9                    | 4.4  | 736.7   | 7.8   |
| SG2610-4-27 | 561.2      | 9021.4         | 3.4  | 17.7                      | 4.2                | 0.4                   | 4.3  | 0.0            | 0.9                     | 0.2 | 297.1                  | 2.5  | 317.8                    | 11.7 | 472.6   | 93.2  |
| SG2610-4-30 | 1088.6     | 69929.9        | 3.0  | 18.3                      | 0.5                | 0.4                   | 2.2  | 0.0            | 2.2                     | 1.0 | 306.9                  | 6.5  | 317.2                    | 6.1  | 393.8   | 11.9  |
| SG2610-4-32 | 213.8      | 3038.9         | 0.9  | 20.5                      | 4.2                | 0.3                   | 4.4  | 0.0            | 1.1                     | 0.3 | 258.1                  | 2.9  | 247.0                    | 9.5  | 142.4   | 98.5  |
| SG2610-4-33 | 297.6      | 3207.8         | 0.6  | 20.8                      | 3.4                | 0.3                   | 3.8  | 0.0            | 1.6                     | 0.4 | 276.5                  | 4.3  | 259.5                    | 8.7  | 108.4   | 81.1  |
| SG2610-4-35 | 321.0      | 4965.1         | 0.9  | 20.1                      | 2.7                | 0.3                   | 3.8  | 0.0            | 2.6                     | 0.7 | 266.1                  | 6.7  | 257.7                    | 8.5  | 182.3   | 63.6  |
| SG2610-4-36 | 62.6       | 8202.1         | 1.2  | 8.1                       | 1.1                | 5.7                   | 6.0  | 0.3            | 5.9                     | 1.0 | 1878.6                 | 95.6 | 1937.0                   | 51.6 | 2000.2  | 19.3  |

**SG2520-2**

|             |        |          |     |      |     |     |     |     |     |     |        |      |        |      |        |       |
|-------------|--------|----------|-----|------|-----|-----|-----|-----|-----|-----|--------|------|--------|------|--------|-------|
| SG2520.2-1  | 337.9  | 8314.2   | 2.5 | 17.1 | 1.0 | 0.7 | 2.6 | 0.1 | 2.4 | 0.9 | 502.2  | 11.7 | 511.7  | 10.6 | 554.0  | 22.6  |
| SG2520.2-2  | 79.0   | 3324.1   | 4.1 | 14.0 | 4.1 | 1.6 | 4.7 | 0.2 | 2.3 | 0.5 | 953.6  | 20.2 | 958.1  | 29.1 | 968.6  | 83.6  |
| SG2520.2-3  | 297.1  | 5575.8   | 1.2 | 18.1 | 3.6 | 0.4 | 4.5 | 0.1 | 2.8 | 0.6 | 325.5  | 8.8  | 337.5  | 13.1 | 421.0  | 80.3  |
| SG2520.2-5  | 276.3  | 3292.6   | 1.7 | 18.5 | 3.4 | 0.6 | 4.5 | 0.1 | 2.9 | 0.7 | 472.9  | 13.2 | 456.5  | 16.4 | 374.9  | 76.0  |
| SG2520.2-6  | 227.8  | 4359.9   | 5.2 | 16.9 | 2.0 | 0.8 | 2.4 | 0.1 | 1.2 | 0.5 | 610.8  | 7.2  | 601.7  | 10.7 | 567.5  | 44.0  |
| SG2520.2-7  | 700.8  | 119293.4 | 1.6 | 13.8 | 0.5 | 1.4 | 3.0 | 0.1 | 3.0 | 1.0 | 824.5  | 23.1 | 873.6  | 17.7 | 1000.3 | 9.6   |
| SG2520.2-8  | 304.3  | 4783.8   | 1.7 | 17.6 | 2.4 | 0.7 | 3.0 | 0.1 | 1.8 | 0.6 | 525.1  | 9.1  | 518.0  | 12.2 | 486.5  | 52.8  |
| SG2520.2-9  | 815.4  | 6220.1   | 4.2 | 19.3 | 0.9 | 0.3 | 2.5 | 0.0 | 2.4 | 0.9 | 305.6  | 7.1  | 301.8  | 6.6  | 272.7  | 20.6  |
| SG2520.2-10 | 233.7  | 4564.3   | 2.1 | 17.0 | 1.7 | 0.8 | 2.7 | 0.1 | 2.1 | 0.8 | 593.4  | 12.0 | 585.7  | 12.2 | 556.0  | 37.7  |
| SG2520.2-11 | 577.0  | 5727.6   | 3.2 | 19.4 | 1.7 | 0.3 | 2.9 | 0.0 | 2.3 | 0.8 | 298.4  | 6.8  | 295.2  | 7.4  | 269.7  | 40.0  |
| SG2520.2-12 | 182.6  | 4773.1   | 2.3 | 17.3 | 5.0 | 0.4 | 5.2 | 0.0 | 1.4 | 0.3 | 277.9  | 3.9  | 305.2  | 13.6 | 518.7  | 108.8 |
| SG2520.2-13 | 473.9  | 3807.0   | 1.0 | 20.0 | 1.3 | 0.3 | 1.7 | 0.0 | 1.1 | 0.6 | 274.8  | 3.0  | 266.7  | 4.0  | 195.8  | 30.8  |
| SG2520.2-15 | 190.6  | 1863.6   | 1.7 | 20.8 | 4.8 | 0.3 | 5.1 | 0.1 | 1.5 | 0.3 | 322.5  | 4.8  | 296.8  | 13.0 | 99.6   | 114.1 |
| SG2520.2-17 | 1196.7 | 34350.4  | 2.7 | 18.1 | 0.9 | 0.4 | 1.7 | 0.0 | 1.4 | 0.9 | 302.2  | 4.2  | 316.5  | 4.5  | 423.1  | 19.0  |
| SG2520.2-18 | 578.9  | 4199.8   | 3.2 | 19.8 | 1.6 | 0.3 | 3.9 | 0.0 | 3.5 | 0.9 | 273.5  | 9.5  | 268.4  | 9.2  | 223.9  | 37.3  |
| SG2520.2-19 | 158.9  | 3824.4   | 2.5 | 17.4 | 5.4 | 0.7 | 6.3 | 0.1 | 3.3 | 0.5 | 523.2  | 16.7 | 521.3  | 25.8 | 513.2  | 118.1 |
| SG2520.2-20 | 392.5  | 6618.5   | 1.4 | 16.2 | 7.2 | 0.7 | 7.3 | 0.1 | 1.5 | 0.2 | 490.5  | 7.3  | 521.3  | 29.8 | 658.5  | 153.5 |
| SG2520.2-21 | 474.8  | 22949.4  | 1.1 | 17.2 | 1.3 | 0.6 | 2.4 | 0.1 | 2.0 | 0.8 | 443.5  | 8.4  | 459.4  | 8.8  | 539.6  | 29.5  |
| SG2520.2-22 | 889.9  | 41889.5  | 2.2 | 8.5  | 0.2 | 5.9 | 1.9 | 0.4 | 1.9 | 1.0 | 1984.4 | 32.0 | 1956.5 | 16.4 | 1927.1 | 4.0   |
| SG2520.2-23 | 372.0  | 8952.2   | 1.9 | 17.0 | 1.1 | 0.7 | 2.3 | 0.1 | 2.0 | 0.9 | 505.7  | 9.7  | 515.7  | 9.3  | 560.1  | 24.5  |
| SG2520.2-24 | 496.9  | 8711.1   | 1.2 | 17.2 | 1.1 | 0.7 | 1.6 | 0.1 | 1.2 | 0.7 | 515.6  | 5.7  | 519.5  | 6.5  | 536.8  | 24.3  |
| SG2520.2-25 | 395.9  | 20817.9  | 2.0 | 16.6 | 3.1 | 0.3 | 3.3 | 0.0 | 1.2 | 0.4 | 266.0  | 3.2  | 304.4  | 8.7  | 610.5  | 66.2  |

**R06-12B**

|            |       |         |     |      |     |     |     |     |     |     |        |      |        |      |        |       |
|------------|-------|---------|-----|------|-----|-----|-----|-----|-----|-----|--------|------|--------|------|--------|-------|
| R06-12B-1  | 520.2 | 18534.8 | 2.1 | 17.3 | 1.6 | 0.7 | 8.7 | 0.1 | 8.6 | 1.0 | 508.4  | 41.9 | 509.8  | 35.0 | 516.3  | 35.6  |
| R06-12B-2  | 287.1 | 4166.9  | 1.4 | 19.6 | 4.1 | 0.3 | 5.8 | 0.0 | 4.1 | 0.7 | 287.5  | 11.6 | 282.3  | 14.4 | 238.9  | 95.0  |
| R06-12B-3  | 246.3 | 5679.5  | 1.1 | 18.0 | 2.1 | 0.6 | 2.6 | 0.1 | 1.5 | 0.6 | 460.0  | 6.5  | 456.4  | 9.4  | 438.0  | 46.7  |
| R06-12B-5  | 166.4 | 3138.9  | 1.7 | 19.9 | 7.9 | 0.3 | 8.5 | 0.0 | 3.1 | 0.4 | 301.3  | 9.3  | 290.6  | 21.4 | 205.9  | 182.6 |
| R06-12B-6  | 350.1 | 9844.0  | 5.1 | 17.2 | 2.2 | 0.6 | 5.2 | 0.1 | 4.7 | 0.9 | 482.9  | 21.8 | 492.3  | 20.3 | 536.2  | 49.0  |
| R06-12B-7  | 576.7 | 8383.4  | 1.4 | 19.2 | 3.2 | 0.3 | 5.3 | 0.0 | 4.2 | 0.8 | 303.5  | 12.6 | 302.4  | 13.9 | 294.6  | 72.6  |
| R06-12B-9  | 222.6 | 2413.1  | 1.1 | 21.4 | 5.0 | 0.3 | 5.3 | 0.0 | 1.9 | 0.4 | 295.0  | 5.5  | 267.4  | 12.5 | 32.0   | 119.0 |
| R06-12B-10 | 325.2 | 6960.2  | 1.1 | 17.5 | 1.7 | 0.6 | 3.0 | 0.1 | 2.5 | 0.8 | 490.0  | 11.7 | 492.1  | 11.8 | 502.1  | 37.9  |
| R06-12B-12 | 250.9 | 2553.3  | 1.4 | 21.9 | 6.9 | 0.3 | 8.2 | 0.0 | 4.4 | 0.5 | 299.6  | 12.8 | 265.9  | 19.1 | -20.7  | 167.1 |
| R06-12B-13 | 369.3 | 25665.7 | 1.6 | 8.6  | 0.5 | 5.7 | 3.0 | 0.4 | 3.0 | 1.0 | 1968.2 | 51.0 | 1931.4 | 26.3 | 1892.1 | 8.8   |
| R06-12B-14 | 477.2 | 4487.9  | 1.7 | 19.6 | 3.5 | 0.3 | 4.2 | 0.0 | 2.3 | 0.5 | 308.1  | 6.8  | 300.4  | 10.9 | 241.3  | 81.0  |

|                 |        |          |      |      |       |     |       |     |      |     |        |       |        |       |        |        |
|-----------------|--------|----------|------|------|-------|-----|-------|-----|------|-----|--------|-------|--------|-------|--------|--------|
| R06-12B-15      | 217.4  | 2270.2   | 1.1  | 20.9 | 6.7   | 0.3 | 7.1   | 0.0 | 2.5  | 0.3 | 304.4  | 7.3   | 281.6  | 17.6  | 95.9   | 158.8  |
| R06-12B-16      | 268.0  | 3083.8   | 0.9  | 17.9 | 9.1   | 0.4 | 11.1  | 0.1 | 6.3  | 0.6 | 346.5  | 21.3  | 359.1  | 33.5  | 441.9  | 202.9  |
| R06-12B-2       | 710.1  | 108516.6 | 9.4  | 8.6  | 0.4   | 4.7 | 7.5   | 0.3 | 7.5  | 1.0 | 1645.2 | 109.4 | 1765.1 | 63.2  | 1910.1 | 6.9    |
| R06-12B-3       | 417.2  | 5235.8   | 1.1  | 19.4 | 2.9   | 0.3 | 4.9   | 0.0 | 4.0  | 0.8 | 297.8  | 11.5  | 294.5  | 12.5  | 267.9  | 66.3   |
| R06-12B-4       | 159.5  | 2433.2   | 1.0  | 19.0 | 5.6   | 0.4 | 6.8   | 0.1 | 3.9  | 0.6 | 379.4  | 14.3  | 370.7  | 21.0  | 316.4  | 126.5  |
| R06-12B-5       | 205.8  | 2800.9   | 4.8  | 20.9 | 7.1   | 0.3 | 8.4   | 0.1 | 4.6  | 0.5 | 320.5  | 14.5  | 293.9  | 21.6  | 88.1   | 167.7  |
| R06-12B-6       | 215.1  | 4364.7   | 1.2  | 17.4 | 3.9   | 0.6 | 5.0   | 0.1 | 3.2  | 0.6 | 498.0  | 15.5  | 500.1  | 19.9  | 509.6  | 85.2   |
| R06-12B-7       | 199.2  | 1662.5   | 1.3  | 23.6 | 12.3  | 0.2 | 12.6  | 0.0 | 2.8  | 0.2 | 260.6  | 7.1   | 219.1  | 24.9  | -205.6 | 310.4  |
| R06-12B-8       | 226.5  | 3815.6   | 2.4  | 17.8 | 3.9   | 0.6 | 5.5   | 0.1 | 3.9  | 0.7 | 484.0  | 18.3  | 479.6  | 21.2  | 458.4  | 86.5   |
| <b>M09-5-3</b>  |        |          |      |      |       |     |       |     |      |     |        |       |        |       |        |        |
| M09-5-3-1       | 35.8   | 1745.3   | 0.7  | 22.0 | 57.8  | 0.2 | 58.7  | 0.0 | 9.8  | 0.2 | 233.8  | 22.6  | 211.1  | 112.3 | -35.4  | 1525.8 |
| M09-5-3-2       | 32.7   | 2470.9   | 0.7  | 26.7 | 64.7  | 0.2 | 65.1  | 0.0 | 6.9  | 0.1 | 259.8  | 17.6  | 195.4  | 116.2 | -526.6 | 1922.5 |
| M09-5-3-3       | 40.0   | 3295.8   | 0.8  | 20.0 | 79.3  | 0.3 | 80.0  | 0.0 | 10.5 | 0.1 | 235.3  | 24.3  | 231.9  | 167.3 | 197.9  | 2257.3 |
| M09-5-3-5       | 45.1   | 1324.7   | 0.6  | 28.5 | 35.9  | 0.2 | 36.5  | 0.0 | 6.5  | 0.2 | 236.8  | 15.2  | 168.6  | 56.8  | -706.4 | 1025.7 |
| M09-5-3-6       | 25.8   | 1476.1   | 0.8  | 19.3 | 55.2  | 0.3 | 55.8  | 0.0 | 7.9  | 0.1 | 248.7  | 19.4  | 251.8  | 125.0 | 280.2  | 1365.3 |
| M09-5-3-8       | 34.9   | 2220.9   | 0.6  | 27.1 | 55.2  | 0.2 | 56.3  | 0.0 | 11.4 | 0.2 | 235.1  | 26.3  | 175.8  | 91.2  | -563.1 | 1596.0 |
| M09-5-3-9       | 50.9   | 2073.3   | 0.7  | 21.5 | 26.9  | 0.3 | 27.4  | 0.0 | 4.8  | 0.2 | 253.0  | 11.9  | 232.4  | 56.9  | 29.0   | 655.8  |
| M09-5-3-10      | 26.3   | 1422.3   | 0.8  | 14.3 | 101.5 | 0.4 | 102.5 | 0.0 | 13.8 | 0.1 | 251.5  | 34.2  | 329.8  | 296.7 | 927.3  | 365.6  |
| M09-5-3-11      | 36.8   | 1818.7   | 0.7  | 19.3 | 30.1  | 0.3 | 33.2  | 0.0 | 14.2 | 0.4 | 252.5  | 35.1  | 255.5  | 75.2  | 282.8  | 701.7  |
| M09-5-3-14      | 59.8   | 1745.8   | 0.8  | 21.2 | 23.1  | 0.2 | 25.5  | 0.0 | 10.8 | 0.4 | 239.7  | 25.4  | 223.8  | 51.2  | 59.5   | 556.2  |
| <b>K08-11-1</b> |        |          |      |      |       |     |       |     |      |     |        |       |        |       |        |        |
| K08-11-4-1      | 396.4  | 29836.3  | 10.4 | 13.1 | 0.9   | 1.9 | 2.1   | 0.2 | 1.9  | 0.9 | 1075.7 | 18.5  | 1083.8 | 13.8  | 1100.0 | 17.9   |
| K08-11-4-2      | 144.0  | 3000.1   | 3.5  | 19.7 | 14.4  | 0.5 | 15.0  | 0.1 | 4.4  | 0.3 | 405.2  | 17.2  | 380.5  | 47.7  | 232.5  | 333.3  |
| K08-11-4-3      | 3041.4 | 67927.4  | 1.9  | 19.2 | 0.6   | 0.3 | 3.5   | 0.0 | 3.5  | 1.0 | 274.7  | 9.4   | 275.8  | 8.6   | 285.1  | 14.4   |
| K08-11-4-7      | 330.3  | 6863.4   | 33.5 | 17.0 | 5.9   | 0.4 | 15.8  | 0.0 | 14.7 | 0.9 | 314.2  | 45.0  | 345.0  | 46.2  | 557.9  | 128.1  |
| K08-11-4-8      | 88.2   | 1338.7   | 1.4  | 18.5 | 13.6  | 0.5 | 15.2  | 0.1 | 6.6  | 0.4 | 395.5  | 25.4  | 392.4  | 49.4  | 374.5  | 308.4  |
| <b>K08-7-1</b>  |        |          |      |      |       |     |       |     |      |     |        |       |        |       |        |        |
| K08-7-1-1       | 240.0  | 30646.5  | 1.2  | 19.1 | 5.1   | 0.3 | 7.4   | 0.0 | 5.3  | 0.7 | 256.5  | 13.4  | 260.4  | 16.9  | 296.2  | 115.6  |
| K08-7-1-2       | 245.0  | 8809.3   | 1.7  | 20.4 | 9.6   | 0.3 | 10.2  | 0.0 | 3.6  | 0.4 | 235.8  | 8.4   | 227.7  | 20.9  | 144.3  | 225.1  |
| K08-7-1-3       | 298.7  | 6724.0   | 16.1 | 8.8  | 1.3   | 5.0 | 12.4  | 0.3 | 12.3 | 1.0 | 1779.5 | 191.7 | 1819.5 | 105.2 | 1865.5 | 22.8   |
| K08-7-1-4       | 444.5  | 38389.0  | 2.3  | 19.5 | 2.7   | 0.3 | 4.0   | 0.0 | 3.0  | 0.7 | 276.7  | 8.0   | 274.2  | 9.7   | 252.4  | 63.0   |
| K08-7-1-5       | 174.7  | 110056.4 | 2.3  | 8.9  | 0.4   | 5.0 | 1.0   | 0.3 | 0.9  | 0.9 | 1818.6 | 15.0  | 1823.0 | 8.8   | 1828.1 | 7.9    |
| K08-7-1-6       | 553.0  | 56969.4  | 2.3  | 19.0 | 3.0   | 0.4 | 4.3   | 0.1 | 3.1  | 0.7 | 372.1  | 11.1  | 364.5  | 13.2  | 316.7  | 68.8   |
| K08-7-1-7       | 56.1   | 5570.2   | 2.7  | 17.1 | 9.7   | 0.6 | 10.8  | 0.1 | 4.7  | 0.4 | 487.7  | 22.3  | 499.4  | 42.8  | 553.6  | 212.9  |
| K08-7-1-8       | 629.5  | 29446.9  | 1.1  | 19.5 | 3.2   | 0.3 | 6.0   | 0.0 | 5.0  | 0.8 | 276.9  | 13.7  | 274.6  | 14.4  | 254.5  | 74.5   |



|                 |        |          |     |      |      |     |      |     |      |     |        |      |        |      |        |       |
|-----------------|--------|----------|-----|------|------|-----|------|-----|------|-----|--------|------|--------|------|--------|-------|
| K08-7-1-9       | 96.7   | 10834.6  | 0.7 | 18.3 | 12.8 | 0.4 | 13.3 | 0.1 | 3.4  | 0.3 | 317.1  | 10.7 | 327.3  | 37.2 | 400.7  | 288.8 |
| K08-7-1-10      | 754.4  | 82577.8  | 2.5 | 8.9  | 0.5  | 5.0 | 1.3  | 0.3 | 1.2  | 0.9 | 1797.0 | 18.8 | 1819.0 | 10.9 | 1844.3 | 8.6   |
| K08-7-1-11      | 141.1  | 22098.2  | 1.8 | 17.8 | 4.0  | 0.6 | 4.8  | 0.1 | 2.6  | 0.6 | 474.1  | 12.0 | 471.1  | 17.9 | 456.1  | 87.9  |
| K08-7-1-12      | 209.7  | 30126.4  | 5.9 | 17.6 | 3.2  | 0.6 | 4.0  | 0.1 | 2.5  | 0.6 | 502.5  | 12.0 | 499.1  | 15.8 | 483.6  | 69.6  |
| K08-7-1-14      | 539.5  | 54687.0  | 2.1 | 18.2 | 10.9 | 0.4 | 12.0 | 0.0 | 4.9  | 0.4 | 295.8  | 14.2 | 309.8  | 32.0 | 415.9  | 244.8 |
| K08-7-1-15      | 248.1  | 35090.3  | 1.5 | 15.0 | 2.2  | 1.3 | 3.2  | 0.1 | 2.3  | 0.7 | 840.3  | 17.9 | 836.9  | 18.0 | 828.0  | 45.6  |
| K08-7-1-16      | 502.4  | 26191.8  | 1.2 | 19.3 | 3.5  | 0.3 | 5.8  | 0.0 | 4.7  | 0.8 | 265.4  | 12.1 | 266.9  | 13.6 | 279.6  | 79.2  |
| K08-7-1-19      | 212.2  | 15187.1  | 1.4 | 18.2 | 11.1 | 0.4 | 11.5 | 0.0 | 3.0  | 0.3 | 305.5  | 8.8  | 318.4  | 31.5 | 414.2  | 249.7 |
| K08-7-1-20      | 419.7  | 51067.4  | 1.8 | 19.2 | 2.6  | 0.3 | 3.9  | 0.0 | 2.9  | 0.7 | 306.6  | 8.6  | 304.1  | 10.2 | 284.6  | 59.7  |
| K08-7-1-21      | 322.8  | 15097.1  | 7.2 | 19.3 | 6.5  | 0.4 | 7.9  | 0.1 | 4.5  | 0.6 | 321.1  | 13.9 | 315.5  | 21.4 | 274.4  | 149.6 |
| K08-7-1-23      | 546.4  | 143539.1 | 1.2 | 15.1 | 1.2  | 1.2 | 3.1  | 0.1 | 2.9  | 0.9 | 809.8  | 22.1 | 810.4  | 17.4 | 812.2  | 24.1  |
| K08-7-1-25      | 695.2  | 135096.1 | 2.6 | 17.3 | 1.1  | 0.6 | 8.4  | 0.1 | 8.3  | 1.0 | 462.1  | 37.1 | 471.8  | 31.7 | 518.9  | 24.8  |
| K08-7-1-26      | 589.9  | 5025.3   | 1.5 | 18.1 | 4.7  | 0.4 | 4.9  | 0.0 | 1.1  | 0.2 | 291.9  | 3.1  | 306.8  | 12.9 | 421.4  | 106.0 |
| K08-7-1-27      | 189.5  | 6626.9   | 3.9 | 17.9 | 12.1 | 0.3 | 12.3 | 0.0 | 2.2  | 0.2 | 279.5  | 6.1  | 298.2  | 31.7 | 447.6  | 268.8 |
| K08-7-1-28      | 118.9  | 24731.7  | 1.8 | 17.6 | 9.7  | 0.5 | 10.2 | 0.1 | 3.2  | 0.3 | 401.5  | 12.4 | 413.8  | 34.8 | 483.2  | 214.9 |
| K08-7-1-29      | 196.0  | 21096.1  | 1.6 | 17.2 | 4.4  | 0.7 | 5.6  | 0.1 | 3.4  | 0.6 | 510.0  | 16.8 | 514.0  | 22.4 | 531.7  | 96.2  |
| K08-7-1-30      | 215.2  | 14666.5  | 1.5 | 21.4 | 11.7 | 0.3 | 11.9 | 0.0 | 2.5  | 0.2 | 268.0  | 6.5  | 245.2  | 26.0 | 32.7   | 280.6 |
| K08-7-1-31      | 86.1   | 6128.1   | 1.6 | 19.9 | 16.4 | 0.3 | 16.9 | 0.0 | 4.3  | 0.3 | 304.1  | 12.6 | 293.0  | 43.0 | 205.4  | 381.7 |
| K08-7-1-32      | 283.2  | 23121.2  | 1.1 | 17.6 | 24.6 | 0.4 | 25.6 | 0.0 | 7.1  | 0.3 | 290.7  | 20.1 | 313.1  | 69.1 | 483.4  | 551.0 |
| K08-7-1-33      | 220.0  | 11055.3  | 5.3 | 20.0 | 7.4  | 0.3 | 9.8  | 0.0 | 6.5  | 0.7 | 307.3  | 19.4 | 295.1  | 25.1 | 200.2  | 171.9 |
| K08-7-1-35      | 382.7  | 38445.4  | 1.1 | 19.5 | 3.8  | 0.3 | 4.7  | 0.0 | 2.8  | 0.6 | 302.2  | 8.3  | 296.9  | 12.2 | 255.4  | 87.4  |
| K08-7-1-36      | 152.9  | 5003.7   | 0.9 | 16.5 | 28.0 | 0.4 | 29.9 | 0.0 | 10.5 | 0.4 | 289.6  | 29.8 | 329.3  | 84.4 | 620.0  | 616.1 |
| K08-7-1-37      | 177.8  | 24504.1  | 0.8 | 19.1 | 11.8 | 0.4 | 15.7 | 0.1 | 10.3 | 0.7 | 361.9  | 36.3 | 353.5  | 46.9 | 298.7  | 271.1 |
| K08-7-1-38      | 83.1   | 3213.6   | 1.2 | 27.0 | 21.3 | 0.2 | 21.6 | 0.0 | 3.7  | 0.2 | 291.5  | 10.5 | 215.6  | 42.0 | -550.6 | 578.5 |
| <b>A10-21-2</b> |        |          |     |      |      |     |      |     |      |     |        |      |        |      |        |       |
| A10-21-2-1      | 152.0  | 6878.6   | 0.9 | 20.8 | 16.6 | 0.3 | 17.1 | 0.0 | 4.1  | 0.2 | 292.7  | 11.6 | 272.1  | 40.7 | 98.0   | 394.2 |
| A10-21-2-5      | 207.8  | 5023.5   | 7.2 | 18.9 | 40.2 | 0.1 | 40.8 | 0.0 | 7.1  | 0.2 | 92.3   | 6.5  | 101.7  | 39.5 | 329.0  | 947.0 |
| A10-21-2-6      | 74.8   | 3764.5   | 1.3 | 17.1 | 11.0 | 0.6 | 11.2 | 0.1 | 2.1  | 0.2 | 479.7  | 9.5  | 492.4  | 43.8 | 552.0  | 241.3 |
| A10-21-2-8      | 236.0  | 17020.7  | 1.9 | 17.6 | 4.4  | 0.6 | 4.5  | 0.1 | 1.0  | 0.2 | 440.5  | 4.5  | 447.9  | 16.2 | 485.9  | 96.2  |
| A10-21-2-9      | 132.2  | 22491.7  | 3.2 | 8.6  | 2.0  | 5.2 | 4.1  | 0.3 | 3.6  | 0.9 | 1817.9 | 57.5 | 1854.5 | 35.3 | 1895.9 | 36.0  |
| <b>A10-13-3</b> |        |          |     |      |      |     |      |     |      |     |        |      |        |      |        |       |
| A10-13-3        | 532.1  | 79649.2  | 4.4 | 16.8 | 0.9  | 0.7 | 2.7  | 0.1 | 2.5  | 0.9 | 533.1  | 12.8 | 543.7  | 11.2 | 588.5  | 19.3  |
| A10-13-3-1      | 65.3   | 4042.9   | 0.6 | 20.7 | 20.9 | 0.3 | 21.1 | 0.0 | 2.3  | 0.1 | 239.0  | 5.4  | 227.6  | 43.0 | 111.3  | 499.0 |
| A10-13-3-2      | 1025.1 | 46124.3  | 2.4 | 18.9 | 1.2  | 0.4 | 2.8  | 0.0 | 2.5  | 0.9 | 303.4  | 7.5  | 305.5  | 7.4  | 321.2  | 26.5  |
| A10-13-3-3      | 225.5  | 49829.8  | 3.3 | 18.3 | 2.8  | 0.6 | 4.4  | 0.1 | 3.4  | 0.8 | 488.1  | 15.9 | 472.5  | 16.5 | 397.3  | 62.3  |

|                 |       |          |     |      |      |     |      |     |     |     |        |       |        |      |        |       |
|-----------------|-------|----------|-----|------|------|-----|------|-----|-----|-----|--------|-------|--------|------|--------|-------|
| A10-13-3-4      | 40.1  | 13616.2  | 2.3 | 15.7 | 10.0 | 0.7 | 11.2 | 0.1 | 5.1 | 0.5 | 499.0  | 24.3  | 542.8  | 47.1 | 731.5  | 211.9 |
| A10-13-3-5      | 252.0 | 15043.9  | 1.3 | 18.3 | 4.8  | 0.3 | 6.8  | 0.0 | 4.8 | 0.7 | 285.6  | 13.4  | 298.3  | 17.6 | 398.6  | 108.1 |
| A10-13-3-6      | 184.0 | 159407.0 | 1.7 | 8.8  | 0.6  | 5.2 | 3.3  | 0.3 | 3.2 | 1.0 | 1823.6 | 51.2  | 1844.5 | 27.9 | 1868.2 | 10.2  |
| A10-13-3-7      | 43.7  | 7077.3   | 1.3 | 22.0 | 14.7 | 0.3 | 16.0 | 0.0 | 6.3 | 0.4 | 307.9  | 18.9  | 271.8  | 38.1 | -28.5  | 357.1 |
| A10-13-3-8      | 305.7 | 64230.5  | 2.1 | 17.3 | 3.6  | 0.6 | 6.2  | 0.1 | 5.1 | 0.8 | 484.0  | 23.6  | 490.1  | 24.2 | 518.8  | 79.0  |
| A10-13-3-9      | 112.1 | 30755.9  | 2.2 | 17.2 | 4.6  | 0.7 | 5.6  | 0.1 | 3.3 | 0.6 | 503.8  | 15.9  | 509.2  | 22.6 | 533.3  | 100.7 |
| A10-13-3-10     | 337.6 | 53247.7  | 1.2 | 19.1 | 3.8  | 0.3 | 7.8  | 0.0 | 6.8 | 0.9 | 283.3  | 18.9  | 285.1  | 19.4 | 299.9  | 87.0  |
| A10-13-3-11     | 161.2 | 26503.6  | 2.0 | 17.3 | 3.3  | 0.6 | 4.4  | 0.1 | 2.8 | 0.6 | 496.7  | 13.5  | 502.4  | 17.3 | 528.6  | 73.2  |
| A10-13-3-12     | 135.9 | 19474.5  | 1.4 | 19.2 | 8.7  | 0.4 | 9.2  | 0.1 | 2.9 | 0.3 | 317.4  | 9.0   | 313.9  | 24.7 | 287.8  | 198.9 |
| A10-13-3-13     | 185.5 | 27826.3  | 2.2 | 18.4 | 3.6  | 0.5 | 6.2  | 0.1 | 5.0 | 0.8 | 394.2  | 19.3  | 392.1  | 20.2 | 379.6  | 81.5  |
| A10-13-3-14     | 49.4  | 13981.7  | 2.7 | 18.0 | 14.8 | 0.6 | 16.8 | 0.1 | 8.1 | 0.5 | 488.2  | 38.0  | 478.9  | 64.3 | 434.7  | 330.2 |
| A10-13-3-15     | 91.4  | 41347.0  | 2.1 | 8.8  | 1.8  | 5.3 | 2.7  | 0.3 | 2.0 | 0.7 | 1868.4 | 32.0  | 1864.0 | 22.8 | 1859.1 | 32.5  |
| A10-13-3-16     | 106.6 | 22516.9  | 2.1 | 16.7 | 11.1 | 0.6 | 11.9 | 0.1 | 4.3 | 0.4 | 453.7  | 18.6  | 478.9  | 45.5 | 601.2  | 241.2 |
| A10-13-3-17     | 180.2 | 256429.7 | 1.7 | 8.7  | 0.4  | 5.1 | 4.1  | 0.3 | 4.1 | 1.0 | 1785.6 | 63.8  | 1828.8 | 34.9 | 1878.4 | 7.7   |
| A10-13-3-18     | 44.1  | 3393.2   | 0.7 | 23.7 | 37.3 | 0.2 | 37.6 | 0.0 | 5.2 | 0.1 | 262.5  | 13.5  | 220.0  | 74.6 | -213.6 | 964.9 |
| A10-13-3-20     | 292.2 | 42912.4  | 5.1 | 19.1 | 6.0  | 0.4 | 6.4  | 0.0 | 2.0 | 0.3 | 311.3  | 6.2   | 310.7  | 17.0 | 306.7  | 137.4 |
| A10-13-3-21     | 123.6 | 13349.2  | 1.6 | 16.8 | 5.8  | 0.7 | 11.3 | 0.1 | 9.7 | 0.9 | 559.0  | 52.0  | 563.7  | 49.0 | 582.7  | 125.9 |
| A10-13-3-22     | 121.1 | 155684.4 | 1.6 | 8.8  | 1.3  | 5.2 | 6.9  | 0.3 | 6.8 | 1.0 | 1836.3 | 107.9 | 1851.0 | 58.7 | 1867.6 | 24.2  |
| A10-13-3-23     | 264.8 | 68325.6  | 3.2 | 18.0 | 3.3  | 0.5 | 3.6  | 0.1 | 1.6 | 0.4 | 425.5  | 6.5   | 426.0  | 12.6 | 428.8  | 72.8  |
| A10-13-3-24     | 480.3 | 94352.6  | 3.2 | 17.5 | 0.9  | 0.6 | 1.3  | 0.1 | 1.0 | 0.7 | 490.4  | 4.6   | 491.4  | 5.2  | 496.2  | 20.1  |
| A10-13-3-25     | 93.9  | 15771.9  | 1.4 | 18.6 | 7.5  | 0.6 | 8.7  | 0.1 | 4.5 | 0.5 | 464.1  | 20.3  | 447.4  | 31.6 | 362.2  | 168.7 |
| A10-13-3-27     | 32.2  | 5197.2   | 2.1 | 18.7 | 29.9 | 0.4 | 30.8 | 0.1 | 7.4 | 0.2 | 333.0  | 23.9  | 335.2  | 88.1 | 351.0  | 689.5 |
| A10-13-3-28     | 157.1 | 51171.0  | 1.7 | 19.1 | 6.4  | 0.4 | 7.2  | 0.0 | 3.2 | 0.4 | 311.3  | 9.7   | 309.9  | 19.1 | 298.9  | 146.5 |
| A10-13-3-29     | 147.0 | 8260.8   | 0.4 | 20.7 | 8.9  | 0.3 | 9.4  | 0.0 | 2.8 | 0.3 | 259.7  | 7.0   | 245.5  | 20.4 | 111.9  | 211.3 |
| A10-13-3-30     | 185.2 | 22314.4  | 2.1 | 19.6 | 5.6  | 0.3 | 7.4  | 0.0 | 4.8 | 0.6 | 256.7  | 12.0  | 254.8  | 16.6 | 237.5  | 129.6 |
| <b>K09-13-1</b> |       |          |     |      |      |     |      |     |     |     |        |       |        |      |        |       |
| K09-13-1-1      | 651.4 | 44480.9  | 1.0 | 18.9 | 1.6  | 0.3 | 9.1  | 0.0 | 9.0 | 1.0 | 298.7  | 26.2  | 301.4  | 23.8 | 321.8  | 35.9  |
| K09-13-1-2      | 135.7 | 21831.6  | 1.5 | 19.6 | 7.3  | 0.3 | 10.0 | 0.0 | 6.8 | 0.7 | 311.3  | 20.7  | 303.2  | 26.1 | 241.1  | 167.5 |
| K09-13-1-3      | 125.5 | 4958.6   | 1.8 | 20.4 | 5.6  | 0.3 | 6.2  | 0.0 | 2.7 | 0.4 | 297.1  | 7.8   | 280.6  | 15.2 | 145.4  | 130.7 |
| K09-13-1-4      | 287.2 | 11373.6  | 1.2 | 19.6 | 3.1  | 0.3 | 3.8  | 0.0 | 2.2 | 0.6 | 297.2  | 6.3   | 291.3  | 9.7  | 245.0  | 72.6  |
| K09-13-1-5      | 118.2 | 5569.4   | 1.3 | 16.1 | 13.6 | 0.4 | 13.8 | 0.0 | 2.6 | 0.2 | 306.3  | 7.9   | 353.9  | 41.4 | 679.3  | 291.4 |
| K09-13-1-6      | 276.6 | 16482.0  | 2.0 | 19.0 | 3.0  | 0.4 | 3.3  | 0.1 | 1.5 | 0.4 | 325.6  | 4.7   | 324.0  | 9.3  | 312.4  | 68.3  |
| K09-13-1-7      | 73.8  | 1894.2   | 0.9 | 19.6 | 11.7 | 0.3 | 13.1 | 0.0 | 5.7 | 0.4 | 306.7  | 17.2  | 298.7  | 33.8 | 236.6  | 271.6 |
| K09-13-1-8      | 394.3 | 36307.0  | 0.8 | 18.9 | 1.4  | 0.3 | 2.2  | 0.0 | 1.7 | 0.8 | 292.9  | 4.8   | 297.1  | 5.7  | 329.8  | 32.2  |
| K09-13-1-11     | 251.4 | 16921.4  | 2.3 | 17.8 | 2.9  | 0.6 | 4.1  | 0.1 | 2.9 | 0.7 | 487.9  | 13.5  | 483.9  | 15.7 | 465.3  | 64.4  |

|               |        |          |      |      |      |     |      |     |     |     |        |      |        |      |        |       |
|---------------|--------|----------|------|------|------|-----|------|-----|-----|-----|--------|------|--------|------|--------|-------|
| K09-13-1-12   | 290.2  | 16860.0  | 4.0  | 17.6 | 1.5  | 0.6 | 1.8  | 0.1 | 1.1 | 0.6 | 501.1  | 5.2  | 497.5  | 7.1  | 480.7  | 32.3  |
| K09-13-1-13   | 250.8  | 10587.8  | 1.2  | 19.5 | 2.8  | 0.3 | 3.2  | 0.0 | 1.4 | 0.4 | 298.2  | 4.0  | 292.6  | 8.0  | 248.5  | 65.4  |
| K09-13-1-14   | 64.7   | 2258.1   | 0.9  | 20.5 | 15.8 | 0.3 | 16.1 | 0.0 | 3.3 | 0.2 | 289.7  | 9.4  | 273.9  | 38.8 | 141.1  | 372.7 |
| K09-13-1-15   | 242.0  | 6367.0   | 0.8  | 19.7 | 3.0  | 0.3 | 5.2  | 0.0 | 4.3 | 0.8 | 299.8  | 12.6 | 292.6  | 13.3 | 235.5  | 68.4  |
| K09-13-1-17   | 92.7   | 3217.2   | 0.8  | 19.7 | 7.5  | 0.4 | 8.9  | 0.1 | 4.8 | 0.5 | 361.2  | 16.8 | 343.7  | 25.9 | 226.6  | 173.6 |
| K09-13-1-18   | 167.5  | 9173.3   | 6.2  | 17.8 | 2.5  | 0.6 | 3.9  | 0.1 | 3.0 | 0.8 | 497.0  | 14.6 | 490.8  | 15.3 | 461.6  | 54.9  |
| K09-13-1-19   | 464.5  | 38118.8  | 5.3  | 16.8 | 2.7  | 0.6 | 3.8  | 0.1 | 2.7 | 0.7 | 486.0  | 12.5 | 503.2  | 15.1 | 582.2  | 58.8  |
| K09-13-1-20   | 222.6  | 5186.5   | 0.8  | 20.1 | 3.7  | 0.3 | 4.8  | 0.0 | 3.0 | 0.6 | 293.2  | 8.5  | 281.0  | 11.7 | 180.9  | 87.3  |
| K09-13-1-21   | 1187.8 | 81971.1  | 19.9 | 14.8 | 2.0  | 1.1 | 4.1  | 0.1 | 3.6 | 0.9 | 691.9  | 23.4 | 730.4  | 21.4 | 850.6  | 42.4  |
| K09-13-1-22   | 158.4  | 7024.4   | 3.3  | 18.1 | 3.9  | 0.6 | 4.0  | 0.1 | 0.9 | 0.2 | 490.5  | 4.3  | 478.9  | 15.4 | 423.7  | 87.5  |
| K09-13-1-23   | 131.2  | 22952.9  | 1.5  | 8.7  | 0.5  | 5.3 | 2.0  | 0.3 | 1.9 | 1.0 | 1853.1 | 30.5 | 1862.9 | 16.7 | 1873.9 | 8.6   |
| K09-13-1-24   | 271.0  | 11439.8  | 7.0  | 17.8 | 1.9  | 0.6 | 2.2  | 0.1 | 1.1 | 0.5 | 492.1  | 5.1  | 487.2  | 8.4  | 464.2  | 42.1  |
| K09-13-1-25   | 244.2  | 5883.9   | 0.8  | 19.2 | 3.9  | 0.3 | 4.5  | 0.0 | 2.2 | 0.5 | 299.2  | 6.5  | 297.9  | 11.7 | 287.3  | 89.9  |
| K09-13-50.1   | 138.7  | 18249.0  | 0.6  | 19.5 | 7.1  | 0.3 | 7.2  | 0.0 | 1.2 | 0.2 | 264.3  | 3.1  | 263.5  | 16.8 | 256.7  | 164.0 |
| K09-13-1-15.1 | 240.5  | 50915.7  | 1.7  | 19.7 | 1.5  | 0.3 | 2.1  | 0.0 | 1.5 | 0.7 | 266.6  | 3.9  | 262.9  | 4.9  | 230.1  | 35.1  |
| K09-13-1-32.1 | 105.4  | 9107.7   | 1.1  | 19.0 | 9.2  | 0.3 | 10.3 | 0.0 | 4.7 | 0.5 | 275.5  | 12.7 | 279.0  | 25.1 | 308.0  | 208.8 |
| K09-13-1-5.1  | 105.3  | 22592.7  | 0.8  | 20.7 | 6.2  | 0.3 | 7.1  | 0.0 | 3.6 | 0.5 | 289.9  | 10.2 | 271.3  | 17.0 | 113.7  | 145.4 |
| K09-13-1-7.1  | 166.8  | 22148.2  | 1.2  | 18.6 | 4.3  | 0.4 | 4.5  | 0.0 | 1.0 | 0.2 | 298.3  | 3.0  | 305.4  | 11.8 | 360.3  | 98.1  |
| K09-13-1-30.1 | 578.3  | 67279.6  | 1.5  | 19.3 | 1.0  | 0.3 | 4.0  | 0.0 | 3.8 | 1.0 | 298.7  | 11.2 | 296.8  | 10.2 | 281.5  | 23.6  |
| K09-13-1-21.1 | 301.8  | 50504.0  | 1.0  | 18.9 | 3.4  | 0.3 | 5.1  | 0.0 | 3.8 | 0.7 | 299.4  | 11.1 | 302.1  | 13.3 | 322.7  | 77.4  |
| K09-13-1-3.1  | 107.3  | 1937.6   | 2.0  | 17.3 | 9.6  | 0.4 | 9.9  | 0.0 | 2.3 | 0.2 | 299.9  | 6.8  | 326.4  | 27.6 | 520.1  | 211.1 |
| K09-13-1-31.1 | 377.2  | 55723.9  | 1.4  | 19.2 | 2.3  | 0.3 | 3.4  | 0.0 | 2.5 | 0.7 | 303.4  | 7.3  | 301.1  | 8.7  | 283.8  | 52.3  |
| K09-13-1-27.1 | 126.2  | 21931.9  | 0.8  | 20.3 | 5.8  | 0.3 | 7.0  | 0.0 | 3.9 | 0.6 | 303.6  | 11.5 | 287.8  | 17.4 | 161.8  | 134.9 |
| K09-13-1-24.1 | 196.3  | 24365.0  | 1.3  | 18.8 | 3.9  | 0.4 | 6.0  | 0.0 | 4.5 | 0.8 | 304.4  | 13.5 | 308.9  | 16.0 | 343.0  | 89.2  |
| K09-13-53.1   | 215.7  | 43683.8  | 0.6  | 18.9 | 3.4  | 0.4 | 4.5  | 0.0 | 2.9 | 0.6 | 305.7  | 8.6  | 308.5  | 11.9 | 329.8  | 77.5  |
| K09-13-1-19.1 | 366.0  | 6330.8   | 2.0  | 18.6 | 3.2  | 0.4 | 4.7  | 0.0 | 3.5 | 0.7 | 306.1  | 10.5 | 312.9  | 12.8 | 364.3  | 71.5  |
| K09-13-46.1   | 319.0  | 61551.7  | 1.3  | 19.0 | 2.0  | 0.4 | 3.0  | 0.0 | 2.2 | 0.7 | 306.1  | 6.6  | 306.3  | 7.8  | 307.7  | 45.3  |
| K09-13-41.1   | 53.4   | 7508.4   | 1.3  | 19.9 | 11.4 | 0.3 | 12.0 | 0.0 | 3.7 | 0.3 | 306.4  | 11.1 | 295.4  | 30.7 | 209.3  | 264.8 |
| K09-13-55.1   | 160.9  | 24579.1  | 1.7  | 18.7 | 4.3  | 0.4 | 6.2  | 0.0 | 4.5 | 0.7 | 306.7  | 13.5 | 311.7  | 16.7 | 349.7  | 97.2  |
| K09-13-1-36.1 | 336.1  | 38210.2  | 1.3  | 19.2 | 2.3  | 0.4 | 3.2  | 0.0 | 2.3 | 0.7 | 308.4  | 6.8  | 306.6  | 8.5  | 293.2  | 52.0  |
| K09-13-52.1   | 228.7  | 22567.2  | 1.2  | 19.3 | 2.0  | 0.4 | 5.0  | 0.0 | 4.6 | 0.9 | 310.4  | 13.9 | 307.0  | 13.2 | 281.4  | 45.3  |
| K09-13-44.1   | 249.3  | 16837.1  | 1.5  | 18.3 | 1.6  | 0.4 | 2.8  | 0.1 | 2.3 | 0.8 | 317.4  | 7.1  | 326.7  | 7.9  | 393.1  | 37.0  |
| K09-13-43.1   | 158.1  | 43259.0  | 1.0  | 19.2 | 4.8  | 0.4 | 5.6  | 0.1 | 3.0 | 0.5 | 317.6  | 9.2  | 314.5  | 15.2 | 291.8  | 108.6 |
| K09-13-54.1   | 184.9  | 13291.7  | 1.3  | 19.7 | 4.2  | 0.4 | 4.9  | 0.1 | 2.5 | 0.5 | 319.8  | 7.9  | 308.7  | 13.1 | 226.1  | 97.7  |
| K09-13-1-14.1 | 222.3  | 206198.3 | 3.9  | 19.0 | 3.3  | 0.4 | 4.1  | 0.1 | 2.4 | 0.6 | 320.6  | 7.4  | 319.1  | 11.1 | 308.1  | 75.1  |
| K09-13-1-1.1  | 271.2  | 43969.0  | 1.5  | 18.7 | 2.5  | 0.4 | 2.6  | 0.1 | 0.9 | 0.3 | 323.8  | 2.7  | 327.7  | 7.4  | 354.9  | 56.2  |

|               |       |          |      |      |      |     |      |     |      |     |        |      |        |       |        |       |
|---------------|-------|----------|------|------|------|-----|------|-----|------|-----|--------|------|--------|-------|--------|-------|
| K09-13-47.1   | 131.8 | 22136.1  | 3.2  | 19.1 | 4.2  | 0.4 | 8.1  | 0.1 | 6.9  | 0.9 | 333.6  | 22.5 | 329.0  | 22.7  | 296.7  | 95.0  |
| K09-13-1-20.1 | 113.3 | 32140.2  | 0.8  | 19.4 | 5.6  | 0.4 | 5.8  | 0.1 | 1.3  | 0.2 | 342.7  | 4.3  | 332.9  | 16.4  | 265.5  | 129.4 |
| K09-13-1-40.1 | 222.1 | 3630.5   | 1.7  | 18.0 | 7.0  | 0.5 | 7.1  | 0.1 | 1.3  | 0.2 | 370.2  | 4.8  | 380.1  | 22.5  | 440.7  | 154.9 |
| K09-13-1-4.1  | 472.9 | 9738.6   | 1.2  | 17.7 | 2.0  | 0.6 | 3.0  | 0.1 | 2.3  | 0.8 | 461.5  | 10.3 | 462.3  | 11.3  | 466.0  | 43.5  |
| K09-13-45.1   | 253.2 | 69388.0  | 1.6  | 17.8 | 1.4  | 0.6 | 3.5  | 0.1 | 3.3  | 0.9 | 464.2  | 14.6 | 462.6  | 13.2  | 454.6  | 31.5  |
| K09-13-1-33.1 | 94.5  | 26897.6  | 0.9  | 17.2 | 5.5  | 0.6 | 6.3  | 0.1 | 3.2  | 0.5 | 472.2  | 14.4 | 482.3  | 24.2  | 530.7  | 119.6 |
| K09-13-1-26.1 | 641.2 | 29764.6  | 2.4  | 17.4 | 2.3  | 0.6 | 17.6 | 0.1 | 17.4 | 1.0 | 477.4  | 80.1 | 482.1  | 67.5  | 504.7  | 50.5  |
| K09-13-1-39.1 | 176.9 | 29799.6  | 0.8  | 17.7 | 1.6  | 0.6 | 2.7  | 0.1 | 2.2  | 0.8 | 496.5  | 10.4 | 491.8  | 10.5  | 470.5  | 35.8  |
| K09-13-1-34.1 | 21.8  | 3326.3   | 1.8  | 19.5 | 24.9 | 0.6 | 29.1 | 0.1 | 15.1 | 0.5 | 498.1  | 72.2 | 456.2  | 107.4 | 250.0  | 581.6 |
| K09-13-1-8.1  | 182.3 | 9031.2   | 1.4  | 17.0 | 6.2  | 0.7 | 7.3  | 0.1 | 3.9  | 0.5 | 499.5  | 18.8 | 510.5  | 29.4  | 560.3  | 135.0 |
| K09-13-42.1   | 137.9 | 29687.1  | 10.6 | 17.4 | 3.4  | 0.6 | 3.9  | 0.1 | 1.8  | 0.5 | 503.7  | 8.7  | 503.8  | 15.4  | 503.9  | 75.7  |
| K09-13-1-9.1  | 132.1 | 24130.3  | 1.6  | 17.3 | 3.5  | 0.6 | 5.5  | 0.1 | 4.3  | 0.8 | 504.3  | 20.8 | 508.3  | 22.1  | 526.7  | 76.6  |
| K09-13-1-2.1  | 40.3  | 11149.3  | 1.4  | 18.5 | 6.1  | 0.6 | 7.5  | 0.1 | 4.3  | 0.6 | 504.7  | 21.1 | 481.2  | 28.7  | 370.7  | 137.5 |
| K09-13-1-25.1 | 516.8 | 68706.9  | 1.3  | 17.3 | 0.6  | 0.6 | 1.7  | 0.1 | 1.6  | 0.9 | 504.8  | 7.9  | 507.3  | 7.0   | 518.4  | 13.9  |
| K09-13-1-38.1 | 546.0 | 50318.9  | 2.1  | 17.6 | 0.8  | 0.6 | 3.8  | 0.1 | 3.7  | 1.0 | 505.4  | 18.1 | 502.0  | 15.1  | 486.9  | 17.8  |
| K09-13-49.1   | 212.6 | 6454.4   | 4.5  | 17.5 | 2.6  | 0.7 | 3.9  | 0.1 | 2.9  | 0.8 | 519.7  | 14.6 | 515.6  | 15.7  | 497.5  | 56.5  |
| K09-13-48.1   | 245.2 | 18836.9  | 5.9  | 17.0 | 4.1  | 0.7 | 4.7  | 0.1 | 2.3  | 0.5 | 528.2  | 11.9 | 534.3  | 19.5  | 560.3  | 88.7  |
| K09-13-56.1   | 111.6 | 5373.7   | 1.5  | 17.2 | 2.8  | 0.7 | 10.5 | 0.1 | 10.1 | 1.0 | 531.6  | 51.7 | 532.0  | 43.5  | 533.4  | 61.3  |
| K09-13-1-10.1 | 392.8 | 7913.1   | 2.6  | 16.9 | 4.1  | 0.7 | 4.3  | 0.1 | 1.4  | 0.3 | 543.0  | 7.2  | 549.8  | 18.2  | 578.0  | 88.1  |
| K09-13-1-35.1 | 181.3 | 39169.8  | 2.3  | 17.3 | 3.6  | 0.7 | 4.1  | 0.1 | 2.0  | 0.5 | 570.1  | 10.7 | 559.6  | 17.6  | 517.1  | 78.9  |
| K09-13-1-28.1 | 102.4 | 15507.4  | 0.8  | 16.5 | 2.5  | 0.8 | 3.1  | 0.1 | 1.9  | 0.6 | 597.2  | 10.8 | 603.6  | 14.1  | 627.7  | 52.8  |
| K09-13-1-37.1 | 75.3  | 20293.3  | 2.8  | 14.8 | 3.2  | 1.3 | 4.1  | 0.1 | 2.5  | 0.6 | 839.5  | 19.5 | 845.2  | 23.2  | 860.0  | 66.6  |
| K09-13-1-16.1 | 88.1  | 48641.5  | 1.0  | 14.9 | 1.4  | 1.4 | 1.8  | 0.1 | 1.1  | 0.6 | 884.1  | 9.1  | 872.8  | 10.3  | 844.2  | 28.5  |
| K09-13-1-11.1 | 299.6 | 62950.2  | 1.4  | 14.2 | 0.7  | 1.5 | 4.6  | 0.2 | 4.6  | 1.0 | 937.1  | 39.8 | 937.7  | 28.2  | 939.3  | 14.4  |
| K09-13-1-18.1 | 66.8  | 52323.2  | 1.1  | 8.8  | 0.7  | 5.3 | 1.4  | 0.3 | 1.2  | 0.9 | 1878.8 | 19.4 | 1869.8 | 11.8  | 1859.7 | 12.6  |
| K09-13-1-29.1 | 185.3 | 124727.3 | 1.1  | 8.8  | 0.5  | 5.2 | 1.3  | 0.3 | 1.3  | 0.9 | 1858.7 | 20.3 | 1860.4 | 11.4  | 1862.2 | 8.3   |
| K09-13-1-12.1 | 314.9 | 193699.2 | 1.7  | 8.8  | 0.5  | 5.3 | 3.0  | 0.3 | 3.0  | 1.0 | 1879.7 | 48.7 | 1872.9 | 25.9  | 1865.4 | 9.3   |
| K09-13-1-23.1 | 254.0 | 25823.2  | 1.2  | 8.8  | 0.3  | 5.1 | 0.7  | 0.3 | 0.7  | 0.9 | 1810.7 | 10.9 | 1836.5 | 6.3   | 1865.9 | 4.8   |
| K09-13-1-13.1 | 323.1 | 663886.7 | 2.4  | 8.7  | 0.2  | 5.5 | 3.8  | 0.3 | 3.8  | 1.0 | 1914.5 | 62.7 | 1898.4 | 32.6  | 1881.0 | 4.2   |

**A10-13-3**

|              |       |         |     |      |      |     |      |     |     |     |       |      |       |       |       |        |
|--------------|-------|---------|-----|------|------|-----|------|-----|-----|-----|-------|------|-------|-------|-------|--------|
| A10-13-3-3.2 | 73.8  | 2780.6  | 0.6 | 18.4 | 11.8 | 0.3 | 12.3 | 0.0 | 3.5 | 0.3 | 248.4 | 8.6  | 262.5 | 28.4  | 390.7 | 264.6  |
| A10-13-3-3.7 | 123.9 | 7763.3  | 0.5 | 19.6 | 6.0  | 0.3 | 7.2  | 0.0 | 4.0 | 0.6 | 248.6 | 9.8  | 248.4 | 15.9  | 246.6 | 137.6  |
| A10-13-3-2.5 | 129.7 | 26448.1 | 0.4 | 19.5 | 8.4  | 0.3 | 8.9  | 0.0 | 3.1 | 0.3 | 255.0 | 7.6  | 254.7 | 20.2  | 252.1 | 193.8  |
| A10-13-3-3.5 | 132.2 | 26730.1 | 0.5 | 19.0 | 5.2  | 0.3 | 8.8  | 0.0 | 7.1 | 0.8 | 265.2 | 18.5 | 269.7 | 20.9  | 308.2 | 119.3  |
| A10-13-3-1.3 | 23.3  | 12589.5 | 0.2 | 19.4 | 45.1 | 0.3 | 45.9 | 0.0 | 8.4 | 0.2 | 268.1 | 22.2 | 267.5 | 108.4 | 262.6 | 1087.8 |

|               |       |          |     |      |      |     |      |     |      |     |        |       |        |      |        |       |
|---------------|-------|----------|-----|------|------|-----|------|-----|------|-----|--------|-------|--------|------|--------|-------|
| A10-13-3-2.9  | 64.6  | 2724.3   | 0.5 | 19.7 | 20.2 | 0.3 | 20.7 | 0.0 | 4.1  | 0.2 | 272.3  | 11.0  | 268.0  | 48.7 | 231.1  | 471.6 |
| A10-13-3-1.1  | 168.4 | 49044.4  | 3.9 | 18.1 | 7.4  | 0.3 | 12.4 | 0.0 | 10.0 | 0.8 | 274.6  | 26.8  | 290.7  | 31.4 | 421.7  | 165.4 |
| A10-13-3-2.2  | 48.9  | 5594.1   | 0.6 | 18.8 | 9.3  | 0.3 | 9.8  | 0.0 | 3.1  | 0.3 | 287.5  | 8.6   | 292.8  | 24.9 | 335.0  | 211.2 |
| A10-13-3-1.4  | 121.7 | 34299.8  | 0.6 | 18.4 | 4.8  | 0.3 | 5.6  | 0.0 | 2.8  | 0.5 | 290.5  | 8.1   | 300.7  | 14.6 | 380.7  | 108.2 |
| A10-13-3-4.3  | 307.7 | 51957.4  | 1.4 | 19.4 | 3.4  | 0.3 | 3.9  | 0.0 | 1.9  | 0.5 | 293.4  | 5.4   | 290.9  | 9.9  | 270.6  | 79.0  |
| A10-13-3-1.7  | 301.7 | 17979.9  | 1.1 | 18.3 | 5.1  | 0.4 | 9.0  | 0.0 | 7.4  | 0.8 | 294.6  | 21.3  | 306.9  | 23.8 | 401.6  | 114.5 |
| A10-13-3-3.1  | 234.3 | 43057.9  | 2.6 | 19.4 | 2.9  | 0.3 | 4.6  | 0.0 | 3.6  | 0.8 | 296.4  | 10.4  | 292.4  | 11.8 | 261.3  | 67.7  |
| A10-13-3-3.3  | 69.9  | 40378.8  | 0.8 | 18.6 | 9.7  | 0.4 | 13.2 | 0.0 | 8.9  | 0.7 | 301.9  | 26.3  | 308.9  | 35.0 | 362.0  | 218.2 |
| A10-13-3-1.9  | 368.7 | 36998.6  | 1.5 | 19.2 | 1.7  | 0.4 | 2.6  | 0.0 | 2.0  | 0.8 | 312.0  | 6.1   | 309.4  | 7.1  | 290.2  | 39.5  |
| A10-13-3-4.6  | 119.4 | 12354.0  | 1.0 | 18.2 | 4.6  | 0.4 | 5.9  | 0.1 | 3.7  | 0.6 | 328.0  | 11.8  | 337.9  | 16.9 | 406.4  | 102.7 |
| A10-13-3-4.2  | 300.8 | 20126.6  | 0.9 | 18.4 | 3.4  | 0.4 | 4.9  | 0.1 | 3.5  | 0.7 | 328.0  | 11.1  | 335.9  | 14.0 | 390.9  | 77.0  |
| A10-13-3-1.8  | 107.0 | 24870.8  | 1.0 | 19.9 | 6.1  | 0.4 | 7.2  | 0.1 | 3.8  | 0.5 | 343.3  | 12.7  | 326.9  | 20.0 | 212.2  | 140.7 |
| A10-13-3-2.1  | 159.2 | 19047.2  | 1.0 | 19.1 | 3.2  | 0.4 | 3.9  | 0.1 | 2.1  | 0.5 | 361.7  | 7.5   | 354.1  | 11.6 | 304.6  | 74.0  |
| A10-13-3-2.4  | 28.4  | 14547.7  | 1.0 | 19.7 | 17.2 | 0.4 | 17.8 | 0.1 | 4.5  | 0.3 | 395.8  | 17.1  | 372.9  | 55.6 | 232.5  | 400.5 |
| A10-13-3-1.1A | 119.6 | 33123.1  | 1.0 | 18.7 | 5.0  | 0.5 | 5.2  | 0.1 | 1.4  | 0.3 | 426.9  | 5.9   | 415.6  | 17.8 | 353.3  | 113.5 |
| A10-13-3-2.7  | 55.1  | 10584.1  | 1.2 | 16.8 | 6.4  | 0.6 | 6.6  | 0.1 | 1.4  | 0.2 | 431.2  | 5.8   | 457.1  | 24.3 | 589.4  | 139.9 |
| A10-13-3-2.3  | 161.5 | 76599.4  | 0.7 | 17.7 | 3.2  | 0.5 | 3.3  | 0.1 | 1.0  | 0.3 | 432.8  | 4.3   | 439.2  | 11.9 | 472.8  | 70.4  |
| A10-13-3-3.8  | 133.4 | 23579.9  | 1.0 | 17.6 | 2.9  | 0.6 | 3.2  | 0.1 | 1.3  | 0.4 | 466.1  | 6.0   | 468.5  | 12.1 | 480.4  | 64.8  |
| A10-13-3-4.0  | 160.5 | 11550.4  | 1.3 | 17.3 | 4.1  | 0.6 | 6.6  | 0.1 | 5.2  | 0.8 | 469.7  | 23.7  | 477.9  | 25.3 | 517.2  | 89.6  |
| A10-13-3-4.8  | 64.6  | 18927.7  | 0.8 | 16.9 | 6.5  | 0.6 | 6.7  | 0.1 | 1.9  | 0.3 | 469.9  | 8.5   | 486.9  | 26.1 | 568.0  | 141.2 |
| A10-13-3-4.5  | 140.6 | 34405.8  | 1.1 | 17.6 | 2.8  | 0.6 | 3.3  | 0.1 | 1.7  | 0.5 | 477.1  | 7.8   | 479.1  | 12.4 | 488.8  | 61.4  |
| A10-13-3-3.4  | 109.4 | 15173.1  | 0.6 | 18.0 | 3.2  | 0.6 | 5.2  | 0.1 | 4.1  | 0.8 | 482.9  | 19.2  | 475.3  | 19.9 | 438.9  | 71.4  |
| A10-13-3-2.6  | 47.8  | 18124.4  | 1.6 | 17.6 | 4.6  | 0.6 | 4.9  | 0.1 | 1.6  | 0.3 | 487.0  | 7.7   | 487.5  | 19.0 | 489.6  | 102.0 |
| A10-13-3-1.10 | 46.6  | 11954.8  | 1.4 | 18.9 | 9.2  | 0.6 | 9.4  | 0.1 | 2.1  | 0.2 | 487.1  | 9.8   | 459.5  | 34.8 | 323.6  | 208.7 |
| A10-13-3-2.10 | 101.2 | 23102.6  | 3.2 | 17.8 | 3.7  | 0.6 | 5.7  | 0.1 | 4.3  | 0.8 | 487.6  | 20.3  | 482.6  | 21.9 | 458.9  | 83.0  |
| A10-13-3-4.4  | 106.7 | 21904.4  | 1.1 | 17.5 | 2.7  | 0.6 | 5.2  | 0.1 | 4.4  | 0.9 | 490.5  | 21.0  | 491.6  | 20.2 | 496.5  | 59.3  |
| A10-13-3-2.8  | 197.5 | 73471.3  | 8.5 | 17.5 | 0.9  | 0.6 | 2.1  | 0.1 | 1.9  | 0.9 | 496.2  | 9.0   | 495.7  | 8.3  | 493.7  | 20.7  |
| A10-13-3-1.6  | 24.0  | 5005.7   | 1.4 | 18.8 | 20.2 | 0.6 | 22.2 | 0.1 | 9.3  | 0.4 | 505.2  | 45.1  | 476.4  | 84.7 | 340.3  | 461.0 |
| A10-13-3-1.5  | 93.9  | 107042.6 | 1.3 | 9.4  | 0.6  | 4.5 | 3.7  | 0.3 | 3.7  | 1.0 | 1720.4 | 55.8  | 1726.5 | 31.1 | 1734.0 | 11.2  |
| A10-13-3-3.9  | 268.5 | 307381.2 | 2.5 | 8.8  | 0.8  | 4.5 | 6.0  | 0.3 | 5.9  | 1.0 | 1643.1 | 86.1  | 1737.5 | 49.8 | 1853.1 | 14.1  |
| A10-13-3-3.6  | 208.3 | 71181.2  | 0.9 | 8.8  | 0.4  | 4.9 | 3.6  | 0.3 | 3.6  | 1.0 | 1751.1 | 55.7  | 1803.6 | 30.8 | 1864.7 | 6.6   |
| A10-13-3-4.1  | 155.7 | 118263.7 | 2.0 | 8.7  | 0.5  | 5.4 | 6.8  | 0.3 | 6.8  | 1.0 | 1893.2 | 111.9 | 1884.8 | 58.7 | 1875.4 | 9.9   |
| A10-13-3-4.7  | 145.3 | 19789.4  | 1.4 | 8.7  | 0.7  | 5.6 | 4.7  | 0.4 | 4.7  | 1.0 | 1944.0 | 78.1  | 1911.5 | 40.5 | 1876.4 | 12.1  |
| K09-13-1-26   | 158.9 | 6745.7   | 0.9 | 17.4 | 2.3  | 0.7 | 4.6  | 0.1 | 3.9  | 0.9 | 538.5  | 20.4  | 533.8  | 19.0 | 513.4  | 50.7  |

**K09-6-5**

|                 |        |          |     |      |      |     |      |     |      |     |        |      |        |       |         |       |
|-----------------|--------|----------|-----|------|------|-----|------|-----|------|-----|--------|------|--------|-------|---------|-------|
| K09-6-5-1       | 294.9  | 37229.9  | 4.5 | 8.5  | 0.3  | 5.7 | 1.7  | 0.4 | 1.7  | 1.0 | 1960.8 | 28.6 | 1937.5 | 14.8  | 1912.5  | 5.4   |
| K09-6-5-2       | 460.6  | 8494.9   | 2.2 | 17.4 | 2.7  | 0.6 | 2.7  | 0.1 | 0.4  | 0.2 | 501.1  | 2.2  | 501.8  | 10.7  | 505.0   | 58.8  |
| K09-6-5-3       | 391.6  | 5977.0   | 2.4 | 19.5 | 2.2  | 0.3 | 2.7  | 0.0 | 1.5  | 0.5 | 302.7  | 4.3  | 297.4  | 6.9   | 255.8   | 51.6  |
| K09-6-5-4       | 283.0  | 13821.2  | 1.7 | 17.7 | 3.7  | 0.4 | 5.1  | 0.1 | 3.6  | 0.7 | 360.0  | 12.6 | 375.6  | 16.1  | 472.8   | 80.9  |
| K09-6-5-5       | 290.3  | 4797.5   | 3.4 | 18.4 | 3.0  | 0.6 | 3.6  | 0.1 | 1.9  | 0.5 | 464.6  | 8.7  | 451.5  | 13.0  | 385.5   | 67.0  |
| K09-6-5-6       | 284.3  | 27381.6  | 2.9 | 7.3  | 0.2  | 7.4 | 2.7  | 0.4 | 2.7  | 1.0 | 2114.6 | 47.9 | 2156.2 | 23.8  | 2196.0  | 3.3   |
| K09-6-5-9       | 536.7  | 22785.6  | 1.2 | 18.4 | 3.0  | 0.4 | 3.4  | 0.0 | 1.5  | 0.4 | 306.5  | 4.5  | 315.6  | 9.2   | 383.8   | 68.5  |
| K09-6-5-11      | 502.2  | 18641.3  | 1.9 | 8.1  | 2.8  | 2.6 | 44.1 | 0.2 | 44.0 | 1.0 | 918.3  | 377  | 1302.3 | 335.4 | 2006.7  | 50.2  |
| K09-6-5-12      | 173.9  | 2612.3   | 1.2 | 20.1 | 4.1  | 0.5 | 4.2  | 0.1 | 0.9  | 0.2 | 456.3  | 3.9  | 414.5  | 14.4  | 187.8   | 96.2  |
| K09-6-5-15      | 1223.2 | 15638.9  | 1.1 | 19.1 | 0.9  | 0.3 | 2.0  | 0.0 | 1.8  | 0.9 | 278.3  | 4.9  | 281.1  | 5.0   | 305.1   | 20.6  |
| <b>K08-11-4</b> |        |          |     |      |      |     |      |     |      |     |        |      |        |       |         |       |
| K08-11-4-1      | 480.0  | 1157.5   | 2.3 | 21.8 | 9.9  | 0.0 | 10.0 | 0.0 | 1.3  | 0.1 | 49.8   | 0.7  | 48.6   | 4.8   | -7.8    | 240.0 |
| K08-11-4-2      | 269.7  | 509.7    | 3.0 | 52.7 | 47.7 | 0.0 | 47.9 | 0.0 | 3.9  | 0.1 | 46.3   | 1.8  | 19.0   | 9.0   | -2870.3 | 303.4 |
| K08-11-4-3      | 765.4  | 1582.6   | 2.1 | 23.0 | 15.7 | 0.0 | 16.2 | 0.0 | 3.8  | 0.2 | 51.1   | 1.9  | 47.4   | 7.5   | -136.2  | 391.6 |
| K08-11-4-5      | 472.9  | 1091.3   | 2.0 | 30.3 | 13.1 | 0.0 | 13.8 | 0.0 | 4.1  | 0.3 | 50.2   | 2.1  | 35.5   | 4.8   | -871.9  | 379.8 |
| K08-11-4-6      | 204.2  | 23833.8  | 4.8 | 12.2 | 2.9  | 1.9 | 9.1  | 0.2 | 8.6  | 0.9 | 1024.8 | 81.6 | 1097.4 | 61.1  | 1244.4  | 57.2  |
| K08-11-4-8      | 500.2  | 1614.9   | 2.7 | 16.8 | 14.2 | 0.1 | 15.0 | 0.0 | 4.9  | 0.3 | 45.2   | 2.2  | 56.8   | 8.3   | 581.6   | 310.2 |
| K08-11-4-10     | 610.7  | 1966.9   | 3.2 | 21.6 | 6.3  | 0.0 | 8.0  | 0.0 | 5.0  | 0.6 | 48.0   | 2.4  | 47.5   | 3.7   | 18.3    | 150.7 |
| <b>A10-9-1</b>  |        |          |     |      |      |     |      |     |      |     |        |      |        |       |         |       |
| A10-9-1-1       | 274.5  | 33916.7  | 2.8 | 19.1 | 3.5  | 0.4 | 4.8  | 0.0 | 3.3  | 0.7 | 308.7  | 10.1 | 308.0  | 12.8  | 302.2   | 79.6  |
| A10-9-1-2       | 76.0   | 9427.8   | 1.3 | 17.5 | 5.7  | 0.6 | 5.9  | 0.1 | 1.4  | 0.2 | 445.9  | 6.1  | 454.5  | 21.6  | 498.2   | 125.9 |
| A10-9-1-6       | 263.7  | 23978.7  | 1.0 | 19.2 | 3.4  | 0.3 | 4.3  | 0.0 | 2.7  | 0.6 | 258.9  | 6.9  | 261.9  | 10.0  | 289.0   | 76.9  |
| A10-9-1-7       | 218.3  | 11258.5  | 0.8 | 20.4 | 3.3  | 0.3 | 4.1  | 0.0 | 2.4  | 0.6 | 261.4  | 6.1  | 251.0  | 9.0   | 154.3   | 77.1  |
| A10-9-1-8       | 228.5  | 13138.6  | 1.3 | 19.9 | 4.9  | 0.3 | 5.1  | 0.0 | 1.3  | 0.3 | 265.9  | 3.3  | 260.0  | 11.6  | 206.6   | 114.0 |
| A10-9-1-9       | 79.3   | 5026.0   | 0.9 | 18.7 | 12.1 | 0.3 | 12.9 | 0.0 | 4.4  | 0.3 | 267.6  | 11.5 | 275.7  | 31.0  | 344.8   | 274.5 |
| A10-9-1-10      | 134.8  | 8137.1   | 0.7 | 18.1 | 5.2  | 0.3 | 5.6  | 0.0 | 2.2  | 0.4 | 255.1  | 5.6  | 272.4  | 13.5  | 423.2   | 115.6 |
| A10-9-1-11      | 303.4  | 21701.4  | 1.9 | 19.2 | 2.2  | 0.3 | 2.9  | 0.0 | 1.9  | 0.7 | 262.1  | 4.9  | 265.5  | 6.8   | 294.7   | 49.7  |
| A10-9-1-12      | 283.5  | 24708.7  | 0.8 | 19.6 | 2.4  | 0.3 | 3.5  | 0.0 | 2.5  | 0.7 | 273.9  | 6.8  | 270.0  | 8.3   | 236.4   | 55.9  |
| A10-9-1-13      | 118.9  | 8414.9   | 1.0 | 21.0 | 11.3 | 0.3 | 12.0 | 0.0 | 4.0  | 0.3 | 265.0  | 10.3 | 247.4  | 26.4  | 83.8    | 269.5 |
| A10-9-1-14      | 403.8  | 29729.3  | 1.7 | 19.1 | 2.2  | 0.3 | 3.1  | 0.0 | 2.3  | 0.7 | 259.6  | 5.7  | 264.0  | 7.3   | 303.0   | 49.5  |
| A10-9-1-15      | 136.6  | 7035.2   | 1.2 | 20.0 | 5.0  | 0.3 | 5.3  | 0.0 | 1.6  | 0.3 | 273.7  | 4.4  | 265.6  | 12.4  | 195.1   | 116.9 |
| A10-9-1-16      | 324.4  | 24443.3  | 3.1 | 19.3 | 2.9  | 0.3 | 3.5  | 0.0 | 2.0  | 0.6 | 277.4  | 5.4  | 277.1  | 8.6   | 274.8   | 67.2  |
| A10-9-1-18      | 47.8   | 4766.7   | 1.2 | 20.8 | 18.0 | 0.3 | 18.6 | 0.0 | 4.7  | 0.3 | 269.0  | 12.4 | 253.1  | 41.7  | 107.5   | 428.3 |
| A10-9-1-19      | 394.0  | 135970.2 | 1.9 | 18.9 | 2.2  | 0.3 | 3.0  | 0.0 | 2.1  | 0.7 | 297.7  | 6.0  | 300.2  | 7.9   | 319.9   | 50.8  |
| A10-9-1-20      | 248.0  | 16601.1  | 1.0 | 19.1 | 3.4  | 0.3 | 4.1  | 0.0 | 2.4  | 0.6 | 260.0  | 6.0  | 264.1  | 9.6   | 300.7   | 77.1  |

|                |        |          |      |      |      |     |      |     |      |     |        |      |        |       |        |       |
|----------------|--------|----------|------|------|------|-----|------|-----|------|-----|--------|------|--------|-------|--------|-------|
| A10-9-1-21     | 260.9  | 14432.2  | 1.4  | 19.6 | 3.0  | 0.3 | 3.4  | 0.0 | 1.5  | 0.4 | 291.4  | 4.4  | 286.0  | 8.5   | 242.1  | 70.3  |
| A10-9-1-22     | 236.6  | 19565.5  | 1.2  | 17.6 | 1.3  | 0.6 | 1.8  | 0.1 | 1.3  | 0.7 | 492.0  | 6.3  | 491.3  | 7.2   | 487.9  | 28.2  |
| A10-9-1-23     | 793.9  | 79285.7  | 2.6  | 17.3 | 0.7  | 0.6 | 2.1  | 0.1 | 2.0  | 0.9 | 497.8  | 9.6  | 501.5  | 8.4   | 518.5  | 15.8  |
| A10-9-1-24     | 187.9  | 57550.8  | 4.2  | 17.5 | 1.8  | 0.6 | 2.9  | 0.1 | 2.2  | 0.8 | 503.0  | 10.7 | 502.7  | 11.4  | 501.5  | 40.3  |
| A10-9-1-25     | 193.0  | 21383.3  | 3.3  | 14.2 | 5.3  | 1.1 | 6.0  | 0.1 | 2.8  | 0.5 | 696.1  | 18.7 | 757.8  | 32.3  | 944.6  | 109.5 |
| A10-9-1-26     | 130.1  | 5533.2   | 0.9  | 19.8 | 4.0  | 0.3 | 6.5  | 0.0 | 5.1  | 0.8 | 258.8  | 13.0 | 255.2  | 14.7  | 222.4  | 92.3  |
| A10-9-1-27     | 75.5   | 9041.8   | 0.9  | 17.8 | 12.4 | 0.3 | 12.9 | 0.0 | 3.5  | 0.3 | 258.1  | 8.9  | 279.4  | 31.4  | 461.6  | 275.2 |
| A10-9-1-28     | 216.0  | 25669.1  | 1.6  | 17.0 | 3.6  | 0.7 | 5.8  | 0.1 | 4.6  | 0.8 | 499.1  | 22.0 | 509.7  | 23.4  | 557.3  | 79.1  |
| A10-9-1-29     | 350.9  | 48327.0  | 0.8  | 19.1 | 1.3  | 0.3 | 3.6  | 0.0 | 3.3  | 0.9 | 249.6  | 8.1  | 255.0  | 8.0   | 304.9  | 29.6  |
| A10-9-1-31     | 266.3  | 8667.7   | 2.8  | 19.7 | 5.7  | 0.3 | 6.4  | 0.0 | 3.1  | 0.5 | 253.5  | 7.6  | 250.7  | 14.3  | 224.5  | 130.8 |
| A10-9-1-32     | 124.2  | 6404.3   | 1.0  | 19.3 | 5.7  | 0.3 | 6.8  | 0.0 | 3.8  | 0.6 | 242.2  | 9.1  | 245.3  | 14.9  | 275.6  | 129.6 |
| A10-9-1-33     | 16.4   | 788.1    | 1.0  | 58.0 | 74.7 | 0.1 | 74.8 | 0.0 | 5.2  | 0.1 | 260.5  | 13.4 | 95.0   | 68.0  | 0.0    | 435.4 |
| A10-9-1-34     | 184.6  | 35486.6  | 1.2  | 19.0 | 6.3  | 0.3 | 6.7  | 0.0 | 2.2  | 0.3 | 261.3  | 5.6  | 266.1  | 15.6  | 308.3  | 143.6 |
| A10-9-1-35     | 375.1  | 17670.0  | 1.2  | 19.7 | 2.1  | 0.3 | 2.7  | 0.0 | 1.7  | 0.6 | 257.2  | 4.3  | 254.9  | 6.0   | 234.2  | 47.5  |
| A10-9-1-36     | 181.8  | 7898.3   | 0.6  | 19.5 | 5.3  | 0.3 | 5.7  | 0.0 | 2.2  | 0.4 | 247.3  | 5.4  | 248.5  | 12.7  | 259.3  | 121.9 |
| A10-9-1-39     | 130.7  | 9764.5   | 1.2  | 18.3 | 1.7  | 0.6 | 3.6  | 0.1 | 3.1  | 0.9 | 454.9  | 13.8 | 445.9  | 12.9  | 399.9  | 38.5  |
| A10-9-40       | 271.3  | 31661.1  | 1.8  | 17.4 | 1.9  | 0.6 | 2.4  | 0.1 | 1.5  | 0.6 | 460.9  | 6.8  | 468.5  | 9.0   | 505.7  | 40.8  |
| A10-9-41       | 96.1   | 3176.7   | 2.5  | 21.6 | 11.8 | 0.3 | 11.9 | 0.0 | 2.0  | 0.2 | 251.8  | 4.9  | 230.1  | 24.5  | 14.3   | 283.4 |
| A10-9-43       | 206.4  | 14852.6  | 1.8  | 19.6 | 2.8  | 0.3 | 3.1  | 0.0 | 1.3  | 0.4 | 258.4  | 3.2  | 256.2  | 6.9   | 236.0  | 64.6  |
| A10-9-44       | 113.0  | 47831.4  | 1.9  | 8.7  | 0.8  | 5.0 | 1.4  | 0.3 | 1.1  | 0.8 | 1771.5 | 17.0 | 1820.5 | 11.5  | 1877.0 | 14.2  |
| A10-9-45       | 92.6   | 4009.2   | 0.9  | 20.3 | 9.2  | 0.3 | 9.6  | 0.0 | 2.8  | 0.3 | 244.1  | 6.7  | 236.4  | 20.2  | 160.2  | 215.0 |
| <b>A10-7-7</b> |        |          |      |      |      |     |      |     |      |     |        |      |        |       |        |       |
| A10-7-7-1      | 72.0   | 5842.6   | 1.0  | 18.1 | 5.4  | 0.6 | 6.0  | 0.1 | 2.6  | 0.4 | 472.2  | 11.8 | 463.4  | 22.1  | 419.9  | 119.8 |
| A10-7-7-2      | 478.4  | 53296.9  | 1.7  | 18.4 | 1.1  | 0.4 | 4.1  | 0.1 | 4.0  | 1.0 | 351.8  | 13.7 | 356.9  | 12.4  | 390.3  | 23.8  |
| A10-7-7-3      | 1952.5 | 105054.5 | 22.3 | 18.8 | 0.7  | 0.4 | 2.5  | 0.0 | 2.4  | 1.0 | 302.8  | 7.1  | 306.3  | 6.6   | 333.3  | 15.8  |
| A10-7-7-4      | 143.3  | 4337.4   | 0.7  | 20.2 | 3.1  | 0.3 | 4.0  | 0.0 | 2.5  | 0.6 | 264.9  | 6.4  | 255.1  | 9.0   | 166.1  | 73.1  |
| A10-7-7-5      | 119.0  | 17409.3  | 1.3  | 15.1 | 2.0  | 1.1 | 3.3  | 0.1 | 2.7  | 0.8 | 756.4  | 19.2 | 771.2  | 18.0  | 814.2  | 40.8  |
| A10-7-7-6      | 1014.0 | 205635.6 | 4.2  | 9.8  | 15.6 | 3.5 | 41.0 | 0.2 | 37.9 | 0.9 | 1422.3 | 485  | 1522.9 | 334.7 | 1665.5 | 289.8 |
| A10-7-7-7      | 154.6  | 14744.5  | 2.0  | 17.4 | 2.3  | 0.6 | 2.5  | 0.1 | 1.1  | 0.4 | 494.3  | 5.1  | 496.6  | 9.9   | 507.1  | 50.0  |
| A10-7-7-8      | 65.5   | 2200.9   | 0.9  | 20.7 | 13.5 | 0.3 | 13.5 | 0.0 | 1.1  | 0.1 | 295.2  | 3.2  | 275.4  | 32.6  | 110.6  | 318.9 |
| A10-7-7-9      | 1194.5 | 95393.5  | 2.4  | 18.0 | 0.6  | 0.5 | 7.3  | 0.1 | 7.3  | 1.0 | 382.2  | 27.0 | 388.8  | 23.6  | 428.6  | 13.2  |
| A10-7-7-10     | 134.9  | 4143.4   | 0.6  | 21.8 | 7.6  | 0.3 | 7.8  | 0.0 | 1.8  | 0.2 | 269.0  | 4.8  | 242.6  | 16.8  | -6.4   | 183.4 |
| A10-7-7-12     | 131.8  | 9151.9   | 1.1  | 18.2 | 4.6  | 0.5 | 5.4  | 0.1 | 2.9  | 0.5 | 445.2  | 12.3 | 438.6  | 19.3  | 404.0  | 102.9 |
| A10-7-7-14     | 216.3  | 12351.2  | 2.2  | 17.5 | 2.5  | 0.6 | 3.5  | 0.1 | 2.5  | 0.7 | 491.8  | 11.8 | 493.7  | 13.8  | 502.8  | 55.3  |
| A10-7-7-15     | 152.3  | 10581.1  | 1.9  | 16.5 | 4.0  | 0.7 | 4.1  | 0.1 | 0.9  | 0.2 | 496.0  | 4.1  | 518.5  | 16.8  | 618.9  | 87.4  |

|                |       |         |      |      |     |      |     |     |     |     |        |      |        |      |        |       |
|----------------|-------|---------|------|------|-----|------|-----|-----|-----|-----|--------|------|--------|------|--------|-------|
| A10-7-7-16     | 347.7 | 8610.3  | 1.0  | 20.2 | 3.4 | 0.3  | 4.0 | 0.0 | 2.0 | 0.5 | 258.4  | 5.2  | 250.0  | 8.8  | 172.2  | 79.8  |
| A10-7-7-19     | 389.4 | 17545.0 | 10.0 | 17.4 | 1.5 | 0.6  | 2.3 | 0.1 | 1.7 | 0.8 | 506.3  | 8.4  | 506.6  | 9.1  | 508.1  | 33.0  |
| A10-7-7-20     | 117.4 | 11337.1 | 1.7  | 17.4 | 3.4 | 0.6  | 3.8 | 0.1 | 1.5 | 0.4 | 503.4  | 7.4  | 503.5  | 14.9 | 503.8  | 75.5  |
| A10-7-7-21     | 183.3 | 9071.8  | 1.5  | 18.1 | 3.1 | 0.6  | 4.0 | 0.1 | 2.5 | 0.6 | 492.1  | 11.8 | 480.8  | 15.2 | 427.2  | 69.0  |
| A10-7-7-23     | 709.3 | 46039.3 | 2.0  | 17.4 | 0.7 | 0.6  | 3.8 | 0.1 | 3.7 | 1.0 | 493.2  | 17.7 | 495.7  | 14.9 | 507.2  | 16.4  |
| A10-7-7-25     | 173.3 | 5905.6  | 1.8  | 19.3 | 4.3 | 0.4  | 5.0 | 0.1 | 2.6 | 0.5 | 328.1  | 8.5  | 321.2  | 13.8 | 271.5  | 98.1  |
| A10-7-7-26     | 325.0 | 21656.6 | 0.6  | 19.0 | 2.9 | 0.3  | 3.5 | 0.0 | 1.9 | 0.5 | 259.3  | 4.9  | 264.7  | 8.1  | 313.2  | 66.7  |
| A10-7-7-27     | 143.3 | 2943.0  | 0.7  | 21.0 | 5.0 | 0.3  | 5.6 | 0.0 | 2.4 | 0.4 | 266.6  | 6.3  | 248.9  | 12.3 | 84.4   | 119.3 |
| A10-7-7-28     | 296.7 | 6642.6  | 1.2  | 20.0 | 1.9 | 0.3  | 2.7 | 0.0 | 1.9 | 0.7 | 267.7  | 5.1  | 260.3  | 6.3  | 194.4  | 45.0  |
| A10-7-7-30     | 129.1 | 3826.7  | 0.6  | 20.0 | 6.4 | 0.3  | 9.0 | 0.0 | 6.3 | 0.7 | 264.0  | 16.3 | 256.7  | 20.4 | 190.7  | 150.0 |
| <b>A10-7-1</b> |       |         |      |      |     |      |     |     |     |     |        |      |        |      |        |       |
| A10-7-1-3      | 154.2 | 8354.6  | 2.7  | 17.9 | 3.5 | 0.6  | 5.9 | 0.1 | 4.7 | 0.8 | 487.8  | 22.1 | 480.7  | 22.6 | 447.1  | 78.9  |
| A10-7-1-5      | 316.7 | 11643.2 | 0.7  | 19.4 | 3.5 | 0.3  | 7.3 | 0.0 | 6.4 | 0.9 | 277.2  | 17.3 | 275.4  | 17.6 | 259.9  | 81.1  |
| A10-7-1-6      | 136.2 | 15752.4 | 2.2  | 10.3 | 1.2 | 2.7  | 3.1 | 0.2 | 2.8 | 0.9 | 1179.2 | 30.5 | 1326.4 | 22.8 | 1572.9 | 22.6  |
| A10-7-1-7      | 234.5 | 4841.7  | 0.7  | 19.6 | 3.5 | 0.3  | 4.0 | 0.0 | 2.0 | 0.5 | 256.4  | 4.9  | 254.6  | 9.1  | 238.2  | 81.5  |
| A10-7-1-8      | 240.9 | 10289.2 | 3.2  | 17.6 | 1.5 | 0.6  | 2.4 | 0.1 | 1.8 | 0.8 | 448.5  | 8.0  | 454.2  | 8.6  | 483.4  | 32.5  |
| A10-7-1-9      | 439.0 | 34789.6 | 1.5  | 18.6 | 2.2 | 0.4  | 3.9 | 0.0 | 3.2 | 0.8 | 309.7  | 9.6  | 316.2  | 10.5 | 364.7  | 49.5  |
| A10-7-1-10     | 245.2 | 5058.1  | 1.9  | 19.4 | 3.2 | 0.3  | 3.8 | 0.0 | 2.1 | 0.6 | 309.8  | 6.3  | 304.5  | 10.0 | 264.1  | 72.9  |
| A10-7-1-12     | 412.0 | 15508.0 | 1.9  | 18.9 | 3.2 | 0.3  | 5.2 | 0.0 | 4.2 | 0.8 | 301.0  | 12.3 | 303.4  | 13.8 | 321.6  | 72.0  |
| A10-7-1-13     | 421.3 | 6810.2  | 1.2  | 19.9 | 2.5 | 0.3  | 2.9 | 0.0 | 1.4 | 0.5 | 260.5  | 3.6  | 254.8  | 6.4  | 202.4  | 57.6  |
| A10-7-1-14     | 232.2 | 4110.0  | 0.8  | 20.2 | 3.4 | 0.3  | 4.3 | 0.0 | 2.8 | 0.6 | 272.0  | 7.4  | 262.1  | 10.0 | 174.3  | 78.3  |
| A10-7-1-15     | 544.8 | 10255.4 | 1.3  | 19.1 | 1.4 | 0.4  | 3.2 | 0.0 | 2.9 | 0.9 | 308.1  | 8.6  | 307.1  | 8.5  | 299.2  | 32.0  |
| A10-7-1-16     | 81.8  | 1534.3  | 0.7  | 25.0 | 8.2 | 0.3  | 8.6 | 0.0 | 2.6 | 0.3 | 308.3  | 8.0  | 243.0  | 18.5 | -349.0 | 210.7 |
| A10-7-1-17     | 479.0 | 14188.4 | 0.9  | 18.8 | 1.9 | 0.4  | 2.5 | 0.0 | 1.6 | 0.6 | 303.5  | 4.8  | 307.3  | 6.6  | 335.5  | 42.8  |
| A10-7-1-18     | 124.5 | 3695.6  | 0.7  | 17.8 | 4.1 | 0.6  | 4.6 | 0.1 | 2.2 | 0.5 | 494.1  | 10.4 | 487.7  | 18.0 | 458.0  | 91.1  |
| A10-7-1-19     | 369.3 | 63313.1 | 3.5  | 5.2  | 3.1 | 12.5 | 3.5 | 0.5 | 1.7 | 0.5 | 2498.1 | 34.2 | 2645.7 | 32.7 | 2760.6 | 50.2  |
| A10-7-1-20     | 366.1 | 15849.7 | 1.1  | 18.6 | 3.4 | 0.3  | 3.5 | 0.0 | 0.6 | 0.2 | 294.6  | 1.8  | 302.4  | 9.0  | 362.9  | 76.7  |
| A10-7-1-21     | 193.7 | 10664.2 | 2.0  | 15.0 | 1.6 | 1.2  | 2.5 | 0.1 | 1.8 | 0.7 | 817.4  | 14.2 | 819.4  | 13.9 | 824.8  | 34.1  |
| A10-7-1-22     | 164.7 | 2628.5  | 0.7  | 22.4 | 5.1 | 0.3  | 6.2 | 0.0 | 3.5 | 0.6 | 265.0  | 9.1  | 233.2  | 12.9 | -76.7  | 124.6 |
| A10-7-1-23     | 175.7 | 10543.6 | 1.7  | 16.4 | 2.0 | 0.8  | 2.7 | 0.1 | 1.8 | 0.7 | 588.9  | 10.0 | 599.9  | 12.0 | 641.8  | 42.7  |
| A10-7-1-24     | 363.4 | 9575.9  | 4.5  | 17.6 | 1.6 | 0.6  | 2.5 | 0.1 | 1.9 | 0.8 | 472.4  | 8.9  | 473.5  | 9.6  | 478.4  | 36.4  |
| A10-7-1-25     | 126.6 | 3675.9  | 2.4  | 18.6 | 3.6 | 0.6  | 3.7 | 0.1 | 0.9 | 0.2 | 494.4  | 4.3  | 472.5  | 14.0 | 367.1  | 81.1  |
| A10-7-1-27     | 216.6 | 6691.6  | 1.9  | 18.4 | 4.5 | 0.4  | 9.1 | 0.1 | 8.0 | 0.9 | 361.8  | 28.0 | 364.7  | 28.0 | 382.9  | 101.3 |
| A10-7-1-28     | 197.0 | 24248.2 | 3.7  | 8.7  | 0.4 | 5.2  | 1.0 | 0.3 | 0.9 | 0.9 | 1807.1 | 14.8 | 1844.5 | 8.7  | 1886.9 | 7.5   |
| A10-7-1-29     | 95.0  | 2504.0  | 0.9  | 18.2 | 5.0 | 0.6  | 6.7 | 0.1 | 4.5 | 0.7 | 466.5  | 20.1 | 456.4  | 24.7 | 405.5  | 112.7 |



|            |       |         |      |      |      |     |      |     |     |     |        |      |        |      |        |       |
|------------|-------|---------|------|------|------|-----|------|-----|-----|-----|--------|------|--------|------|--------|-------|
| A10-7-1-30 | 469.9 | 11828.9 | 13.1 | 17.4 | 0.9  | 0.6 | 1.5  | 0.1 | 1.2 | 0.8 | 496.0  | 5.6  | 498.1  | 5.9  | 507.5  | 20.5  |
| A10-7-1-31 | 81.7  | 1379.3  | 0.7  | 23.5 | 8.5  | 0.3 | 9.6  | 0.1 | 4.4 | 0.5 | 340.4  | 14.5 | 280.1  | 23.5 | -196.9 | 213.6 |
| A10-7-1-32 | 66.4  | 4938.1  | 1.5  | 9.9  | 1.4  | 3.0 | 3.7  | 0.2 | 3.5 | 0.9 | 1237.5 | 39.2 | 1395.0 | 28.4 | 1644.7 | 25.8  |
| A10-7-1-33 | 212.9 | 4959.0  | 0.6  | 19.5 | 5.1  | 0.3 | 5.8  | 0.0 | 2.9 | 0.5 | 264.5  | 7.5  | 263.9  | 13.5 | 257.9  | 116.4 |
| A10-7-1-34 | 182.7 | 4894.9  | 0.9  | 19.6 | 5.2  | 0.3 | 6.5  | 0.0 | 3.8 | 0.6 | 298.0  | 11.2 | 292.3  | 16.5 | 247.0  | 120.7 |
| A10-7-1-35 | 828.7 | 19634.6 | 1.5  | 19.1 | 1.0  | 0.3 | 1.8  | 0.0 | 1.5 | 0.8 | 288.4  | 4.4  | 290.4  | 4.6  | 306.9  | 22.0  |
| A10-7-1-36 | 190.4 | 6287.0  | 7.8  | 17.6 | 2.0  | 0.6 | 3.4  | 0.1 | 2.7 | 0.8 | 493.6  | 12.8 | 491.4  | 13.1 | 481.0  | 44.1  |
| A10-7-1-37 | 121.5 | 4130.4  | 0.9  | 17.8 | 3.9  | 0.6 | 4.3  | 0.1 | 1.9 | 0.4 | 491.3  | 8.9  | 484.7  | 16.7 | 453.3  | 87.0  |
| A10-7-1-38 | 217.3 | 6097.9  | 0.8  | 19.5 | 3.9  | 0.3 | 5.3  | 0.0 | 3.5 | 0.7 | 270.6  | 9.2  | 269.2  | 12.4 | 256.8  | 90.3  |
| A10-7-1-39 | 270.7 | 6712.8  | 25.9 | 17.8 | 2.7  | 0.6 | 3.3  | 0.1 | 1.9 | 0.6 | 486.1  | 8.7  | 480.7  | 12.6 | 454.8  | 60.2  |
| A10-7-1-41 | 94.5  | 2040.8  | 1.1  | 20.1 | 12.3 | 0.3 | 12.6 | 0.0 | 2.9 | 0.2 | 308.2  | 8.6  | 294.4  | 32.3 | 186.2  | 287.3 |
| A10-7-1-42 | 183.9 | 6180.1  | 2.0  | 18.1 | 2.7  | 0.6 | 3.4  | 0.1 | 2.1 | 0.6 | 482.3  | 9.6  | 471.1  | 12.8 | 416.8  | 60.6  |

**K08-7-1**

|              |       |         |     |      |      |     |      |     |     |     |       |      |       |      |       |       |
|--------------|-------|---------|-----|------|------|-----|------|-----|-----|-----|-------|------|-------|------|-------|-------|
| K08-7-1-26.1 | 283.2 | 36859.7 | 0.6 | 19.4 | 2.1  | 0.3 | 3.8  | 0.0 | 3.1 | 0.8 | 251.8 | 7.7  | 253.2 | 8.4  | 266.5 | 48.6  |
| K08-7-1-67.1 | 66.6  | 538.9   | 0.9 | 14.8 | 21.0 | 0.4 | 22.1 | 0.0 | 6.9 | 0.3 | 252.6 | 17.2 | 321.8 | 61.1 | 858.5 | 440.5 |
| K08-7-1-72.1 | 336.8 | 61430.7 | 1.1 | 19.1 | 3.2  | 0.3 | 3.7  | 0.0 | 1.8 | 0.5 | 252.9 | 4.4  | 257.4 | 8.4  | 298.1 | 74.1  |
| K08-7-1-58.1 | 62.7  | 2047.1  | 1.2 | 18.4 | 16.8 | 0.3 | 17.1 | 0.0 | 2.8 | 0.2 | 254.7 | 7.1  | 267.7 | 40.2 | 383.3 | 381.0 |
| K08-7-1-80.1 | 189.3 | 20472.3 | 1.2 | 19.2 | 6.0  | 0.3 | 6.9  | 0.0 | 3.5 | 0.5 | 257.4 | 8.8  | 260.5 | 15.8 | 288.9 | 136.1 |
| K08-7-1-65.1 | 142.9 | 14333.6 | 0.9 | 19.3 | 5.5  | 0.3 | 5.8  | 0.0 | 2.0 | 0.3 | 258.0 | 5.0  | 259.9 | 13.3 | 277.5 | 125.1 |
| K08-7-1-27.1 | 79.4  | 10972.6 | 0.5 | 22.3 | 12.8 | 0.3 | 13.3 | 0.0 | 3.4 | 0.3 | 258.7 | 8.6  | 229.1 | 27.2 | -64.3 | 314.5 |
| K08-7-1-41.1 | 212.8 | 58159.5 | 0.8 | 18.2 | 3.3  | 0.3 | 3.8  | 0.0 | 1.8 | 0.5 | 259.1 | 4.6  | 274.2 | 9.1  | 405.1 | 74.5  |
| K08-7-1-71.1 | 297.1 | 32255.1 | 1.3 | 20.0 | 3.2  | 0.3 | 4.4  | 0.0 | 3.1 | 0.7 | 260.4 | 7.8  | 254.3 | 10.0 | 198.7 | 74.3  |
| K08-7-1-48.1 | 135.3 | 15164.6 | 0.7 | 19.2 | 4.7  | 0.3 | 5.2  | 0.0 | 2.2 | 0.4 | 262.3 | 5.8  | 265.1 | 12.2 | 290.2 | 108.4 |
| K08-7-1-16.1 | 132.5 | 5565.3  | 1.5 | 18.7 | 8.3  | 0.3 | 8.5  | 0.0 | 1.8 | 0.2 | 264.4 | 4.7  | 273.5 | 20.3 | 351.7 | 186.8 |
| K08-7-1-11.1 | 196.0 | 15840.4 | 0.4 | 19.8 | 5.6  | 0.3 | 5.9  | 0.0 | 1.8 | 0.3 | 265.5 | 4.8  | 260.8 | 13.6 | 218.5 | 129.8 |
| K08-7-1-10.1 | 120.1 | 33350.3 | 0.8 | 20.2 | 8.7  | 0.3 | 8.9  | 0.0 | 2.0 | 0.2 | 267.1 | 5.3  | 257.1 | 20.2 | 167.4 | 202.8 |
| K08-7-1-81.1 | 85.3  | 4489.5  | 0.9 | 18.9 | 12.0 | 0.3 | 12.8 | 0.0 | 4.4 | 0.3 | 267.1 | 11.6 | 272.8 | 30.6 | 322.0 | 273.0 |
| K08-7-1-84.1 | 249.3 | 24584.2 | 1.2 | 19.6 | 3.8  | 0.3 | 4.0  | 0.0 | 1.0 | 0.3 | 267.2 | 2.6  | 264.8 | 9.3  | 243.5 | 88.7  |
| K08-7-1-36.1 | 283.8 | 13745.7 | 0.4 | 19.1 | 2.8  | 0.3 | 3.4  | 0.0 | 2.0 | 0.6 | 269.5 | 5.3  | 273.4 | 8.2  | 306.6 | 63.4  |
| K08-7-1-22.1 | 275.5 | 41297.8 | 3.0 | 19.4 | 4.9  | 0.3 | 5.1  | 0.0 | 1.2 | 0.2 | 269.9 | 3.2  | 269.0 | 12.0 | 261.4 | 113.4 |
| K08-7-1-12.1 | 289.3 | 20060.5 | 1.4 | 19.5 | 4.1  | 0.3 | 5.7  | 0.0 | 4.0 | 0.7 | 272.9 | 10.6 | 271.2 | 13.6 | 256.7 | 94.0  |
| K08-7-1-66.1 | 325.4 | 11652.6 | 1.6 | 19.5 | 3.4  | 0.3 | 5.2  | 0.0 | 3.9 | 0.8 | 273.0 | 10.4 | 270.9 | 12.3 | 252.6 | 77.6  |
| K08-7-1-87.1 | 119.1 | 3828.8  | 1.2 | 18.6 | 3.8  | 0.3 | 4.3  | 0.0 | 2.0 | 0.5 | 277.0 | 5.5  | 285.9 | 10.7 | 359.7 | 85.0  |
| K08-7-1-19.1 | 56.0  | 5772.8  | 0.5 | 20.4 | 16.5 | 0.3 | 16.8 | 0.0 | 3.0 | 0.2 | 278.3 | 8.1  | 264.7 | 39.1 | 146.6 | 389.4 |
| K08-7-1-85.1 | 199.0 | 17040.0 | 1.5 | 19.3 | 3.4  | 0.3 | 3.9  | 0.0 | 1.9 | 0.5 | 278.7 | 5.3  | 279.0 | 9.5  | 281.8 | 77.3  |

|              |       |         |     |      |      |     |      |     |     |     |       |      |       |      |       |       |
|--------------|-------|---------|-----|------|------|-----|------|-----|-----|-----|-------|------|-------|------|-------|-------|
| K08-7-1-83.1 | 278.7 | 63983.9 | 1.2 | 18.9 | 3.7  | 0.3 | 6.2  | 0.0 | 4.9 | 0.8 | 279.6 | 13.4 | 283.9 | 15.3 | 319.5 | 85.1  |
| K08-7-1-69.1 | 189.3 | 23083.5 | 1.0 | 19.0 | 3.1  | 0.3 | 4.3  | 0.0 | 3.0 | 0.7 | 285.9 | 8.3  | 288.6 | 10.8 | 310.5 | 70.5  |
| K08-7-1-38.1 | 151.0 | 13386.7 | 0.8 | 19.7 | 4.7  | 0.3 | 5.0  | 0.0 | 1.4 | 0.3 | 286.0 | 4.0  | 280.2 | 12.1 | 232.1 | 109.5 |
| K08-7-1-93.1 | 336.3 | 37197.8 | 2.0 | 19.0 | 3.1  | 0.3 | 4.3  | 0.0 | 2.9 | 0.7 | 287.0 | 8.2  | 290.0 | 10.8 | 314.4 | 70.7  |
| K08-7-1-40.1 | 355.2 | 59683.0 | 0.4 | 19.2 | 1.0  | 0.3 | 1.7  | 0.0 | 1.3 | 0.8 | 288.8 | 3.8  | 288.8 | 4.2  | 288.6 | 23.7  |
| K08-7-1-86.1 | 93.0  | 4737.4  | 1.1 | 18.5 | 8.7  | 0.3 | 9.4  | 0.0 | 3.3 | 0.4 | 293.3 | 9.6  | 301.9 | 24.4 | 368.2 | 197.3 |
| K08-7-1-42.1 | 221.5 | 2743.2  | 0.7 | 18.2 | 6.8  | 0.4 | 7.7  | 0.0 | 3.6 | 0.5 | 294.2 | 10.4 | 307.5 | 20.3 | 409.6 | 151.4 |
| K08-7-1-94.1 | 337.4 | 51802.8 | 3.6 | 19.3 | 1.9  | 0.3 | 2.7  | 0.0 | 1.9 | 0.7 | 294.5 | 5.5  | 292.2 | 6.9  | 273.9 | 43.8  |
| K08-7-1-61.1 | 140.2 | 21131.5 | 1.0 | 18.2 | 5.0  | 0.4 | 6.6  | 0.0 | 4.2 | 0.6 | 295.1 | 12.2 | 307.8 | 17.4 | 404.9 | 112.5 |
| K08-7-1-92.1 | 139.0 | 8905.0  | 0.9 | 19.4 | 4.8  | 0.3 | 5.2  | 0.0 | 2.1 | 0.4 | 295.5 | 6.1  | 292.3 | 13.2 | 266.7 | 109.2 |
| K08-7-1-21.1 | 107.2 | 14981.1 | 0.9 | 18.4 | 5.9  | 0.4 | 6.2  | 0.0 | 1.9 | 0.3 | 298.2 | 5.6  | 308.6 | 16.5 | 387.8 | 132.1 |
| K08-7-1-91.1 | 250.4 | 23099.2 | 1.0 | 18.8 | 4.4  | 0.3 | 7.9  | 0.0 | 6.6 | 0.8 | 299.5 | 19.3 | 304.1 | 20.8 | 339.3 | 99.8  |
| K08-7-1-75.1 | 159.0 | 20957.3 | 1.0 | 19.0 | 8.2  | 0.3 | 8.5  | 0.0 | 2.3 | 0.3 | 299.6 | 6.7  | 301.8 | 22.2 | 318.4 | 186.4 |
| K08-7-1-97.1 | 80.0  | 752.4   | 0.7 | 15.3 | 10.8 | 0.4 | 11.8 | 0.0 | 4.7 | 0.4 | 300.2 | 13.9 | 362.0 | 35.8 | 779.6 | 227.1 |
| K08-7-1-28.1 | 138.7 | 18215.7 | 1.8 | 18.7 | 4.1  | 0.4 | 4.9  | 0.0 | 2.8 | 0.6 | 301.1 | 8.1  | 305.9 | 13.0 | 343.1 | 92.5  |
| K08-7-1-46.1 | 274.3 | 16834.4 | 1.1 | 18.7 | 3.8  | 0.4 | 4.8  | 0.0 | 2.8 | 0.6 | 304.0 | 8.5  | 308.9 | 12.8 | 345.9 | 87.1  |
| K08-7-1-2.1  | 204.7 | 22900.9 | 0.7 | 19.0 | 3.6  | 0.4 | 5.1  | 0.0 | 3.6 | 0.7 | 306.7 | 10.8 | 308.0 | 13.5 | 318.1 | 81.8  |
| K08-7-1-50.1 | 103.3 | 14155.3 | 0.7 | 19.6 | 9.7  | 0.3 | 11.6 | 0.0 | 6.3 | 0.5 | 308.9 | 19.1 | 300.9 | 30.1 | 239.4 | 223.6 |
| K08-7-1-82.1 | 65.4  | 5834.9  | 0.9 | 19.1 | 15.2 | 0.4 | 15.5 | 0.0 | 3.1 | 0.2 | 311.1 | 9.4  | 310.2 | 41.5 | 303.7 | 348.3 |
| K08-7-1-35.1 | 89.3  | 8274.2  | 0.9 | 19.8 | 7.9  | 0.3 | 8.1  | 0.0 | 2.0 | 0.2 | 313.2 | 6.1  | 302.5 | 21.3 | 220.7 | 183.0 |
| K08-7-1-17.1 | 186.2 | 20361.0 | 3.9 | 18.9 | 2.6  | 0.4 | 6.6  | 0.1 | 6.0 | 0.9 | 315.8 | 18.5 | 316.7 | 17.8 | 323.3 | 59.9  |
| K08-7-1-63.1 | 94.7  | 10495.8 | 0.9 | 18.9 | 7.3  | 0.4 | 8.1  | 0.1 | 3.4 | 0.4 | 318.8 | 10.6 | 320.1 | 22.2 | 330.0 | 166.0 |
| K08-7-1-37.1 | 138.7 | 23067.5 | 0.7 | 19.3 | 4.8  | 0.4 | 6.7  | 0.1 | 4.7 | 0.7 | 320.2 | 14.8 | 315.0 | 18.2 | 276.7 | 109.8 |
| K08-7-1-5.1  | 158.3 | 28356.6 | 1.6 | 19.7 | 6.5  | 0.4 | 7.5  | 0.1 | 3.6 | 0.5 | 325.8 | 11.4 | 314.6 | 20.2 | 232.6 | 151.3 |
| K08-7-1-96.1 | 156.7 | 22946.3 | 0.9 | 18.7 | 4.2  | 0.4 | 5.0  | 0.1 | 2.7 | 0.5 | 326.7 | 8.6  | 329.9 | 14.1 | 352.6 | 95.2  |
| K08-7-1-88.1 | 529.1 | 23649.9 | 1.4 | 18.7 | 2.8  | 0.4 | 3.4  | 0.1 | 1.9 | 0.6 | 331.8 | 6.3  | 334.0 | 9.6  | 348.9 | 62.4  |
| K08-7-1-6.1  | 478.8 | 15043.7 | 1.2 | 18.5 | 4.5  | 0.4 | 6.2  | 0.1 | 4.2 | 0.7 | 334.3 | 13.6 | 339.9 | 17.8 | 378.1 | 102.0 |
| K08-7-1-79.1 | 189.9 | 25904.0 | 0.9 | 18.6 | 2.5  | 0.4 | 4.2  | 0.1 | 3.4 | 0.8 | 335.3 | 11.2 | 338.8 | 12.2 | 362.6 | 55.7  |
| K08-7-1-49.1 | 106.3 | 55329.7 | 1.2 | 17.9 | 8.5  | 0.4 | 8.9  | 0.1 | 2.6 | 0.3 | 337.5 | 8.7  | 351.4 | 26.5 | 444.4 | 190.0 |
| K08-7-1-47.1 | 121.8 | 20439.6 | 1.9 | 18.4 | 3.4  | 0.4 | 3.7  | 0.1 | 1.5 | 0.4 | 342.3 | 5.0  | 348.5 | 10.9 | 389.7 | 75.7  |
| K08-7-1-90.1 | 222.1 | 19242.7 | 0.9 | 18.5 | 2.0  | 0.4 | 4.7  | 0.1 | 4.3 | 0.9 | 344.2 | 14.4 | 347.5 | 14.0 | 369.9 | 45.0  |
| K08-7-1-74.1 | 217.5 | 19471.2 | 1.1 | 18.1 | 2.4  | 0.4 | 3.0  | 0.1 | 1.7 | 0.6 | 345.4 | 5.9  | 355.0 | 8.9  | 417.8 | 53.6  |
| K08-7-1-78.1 | 79.7  | 9770.2  | 0.7 | 18.1 | 8.3  | 0.4 | 8.4  | 0.1 | 1.3 | 0.2 | 347.6 | 4.5  | 357.8 | 25.4 | 424.9 | 185.5 |
| K08-7-1-44.1 | 34.5  | 5391.3  | 0.4 | 21.8 | 24.2 | 0.4 | 25.1 | 0.1 | 6.7 | 0.3 | 349.7 | 22.9 | 306.2 | 66.6 | -13.3 | 592.8 |
| K08-7-1-13.1 | 90.1  | 15557.6 | 1.0 | 18.1 | 10.3 | 0.4 | 11.6 | 0.1 | 5.4 | 0.5 | 350.6 | 18.3 | 360.1 | 35.2 | 422.0 | 230.5 |
| K08-7-1-77.1 | 231.9 | 22792.3 | 0.8 | 18.6 | 2.5  | 0.4 | 3.3  | 0.1 | 2.2 | 0.7 | 358.0 | 7.6  | 357.7 | 10.0 | 355.6 | 56.4  |

|               |       |          |     |      |      |     |      |     |     |     |        |      |        |      |        |       |
|---------------|-------|----------|-----|------|------|-----|------|-----|-----|-----|--------|------|--------|------|--------|-------|
| K08-7-1-8.1   | 65.5  | 18271.6  | 0.7 | 18.0 | 15.5 | 0.4 | 15.8 | 0.1 | 3.2 | 0.2 | 368.2  | 11.3 | 376.7  | 49.7 | 429.2  | 346.3 |
| K08-7-1-33.1  | 148.7 | 25561.4  | 0.9 | 18.4 | 2.3  | 0.4 | 3.0  | 0.1 | 1.9 | 0.6 | 370.9  | 6.8  | 373.2  | 9.4  | 387.2  | 52.2  |
| K08-7-1-23.1  | 248.2 | 74050.0  | 1.1 | 18.4 | 1.8  | 0.5 | 2.5  | 0.1 | 1.7 | 0.7 | 392.1  | 6.4  | 391.8  | 8.0  | 389.5  | 40.8  |
| K08-7-1-64.1  | 208.0 | 31474.1  | 1.5 | 18.4 | 2.6  | 0.5 | 3.8  | 0.1 | 2.7 | 0.7 | 394.5  | 10.3 | 394.0  | 12.3 | 391.0  | 58.7  |
| K08-7-1-95.1  | 241.1 | 2503.3   | 1.7 | 18.0 | 3.2  | 0.5 | 3.7  | 0.1 | 1.9 | 0.5 | 396.3  | 7.3  | 402.6  | 12.3 | 438.5  | 70.8  |
| K08-7-1-89.1  | 381.7 | 16653.6  | 3.3 | 18.0 | 1.1  | 0.5 | 4.9  | 0.1 | 4.7 | 1.0 | 399.4  | 18.3 | 404.0  | 16.2 | 430.4  | 25.3  |
| K08-7-1-62.1  | 239.7 | 30632.9  | 2.8 | 16.7 | 10.5 | 0.5 | 11.6 | 0.1 | 5.0 | 0.4 | 412.3  | 20.0 | 441.2  | 41.5 | 594.8  | 227.1 |
| K08-7-1-102.1 | 234.6 | 13077.6  | 0.7 | 17.5 | 2.3  | 0.6 | 3.1  | 0.1 | 2.0 | 0.6 | 456.0  | 8.7  | 462.5  | 11.4 | 494.9  | 51.4  |
| K08-7-1-51.1  | 715.4 | 56536.8  | 1.2 | 17.1 | 2.6  | 0.6 | 4.2  | 0.1 | 3.4 | 0.8 | 477.6  | 15.5 | 489.5  | 16.4 | 545.4  | 55.8  |
| K08-7-1-24.1  | 212.5 | 70437.1  | 1.0 | 17.4 | 2.1  | 0.6 | 2.5  | 0.1 | 1.4 | 0.6 | 478.5  | 6.6  | 484.3  | 9.8  | 511.9  | 46.4  |
| K08-7-1-53.1  | 166.3 | 17532.6  | 0.9 | 17.4 | 3.5  | 0.6 | 7.1  | 0.1 | 6.2 | 0.9 | 479.0  | 28.8 | 483.7  | 27.4 | 506.0  | 76.1  |
| K08-7-1-60.1  | 287.3 | 82740.7  | 1.3 | 17.5 | 2.1  | 0.6 | 4.7  | 0.1 | 4.2 | 0.9 | 479.2  | 19.3 | 482.0  | 18.0 | 495.4  | 47.3  |
| K08-7-1-99.1  | 210.1 | 50032.8  | 1.3 | 17.4 | 1.4  | 0.6 | 2.8  | 0.1 | 2.5 | 0.9 | 481.2  | 11.4 | 485.9  | 11.0 | 508.2  | 31.1  |
| K08-7-1-100.1 | 151.6 | 33260.4  | 1.4 | 17.1 | 3.2  | 0.6 | 4.0  | 0.1 | 2.3 | 0.6 | 485.1  | 10.9 | 497.2  | 15.5 | 553.3  | 69.6  |
| K08-7-1-98.1  | 392.6 | 65584.9  | 1.8 | 17.6 | 0.8  | 0.6 | 3.1  | 0.1 | 3.0 | 1.0 | 489.6  | 14.2 | 489.4  | 12.1 | 488.2  | 18.0  |
| K08-7-1-1.1   | 196.6 | 28718.0  | 1.1 | 17.5 | 2.2  | 0.6 | 2.4  | 0.1 | 0.9 | 0.4 | 489.8  | 4.4  | 491.8  | 9.2  | 501.1  | 47.8  |
| K08-7-1-54.1  | 275.7 | 47575.3  | 1.1 | 17.4 | 1.2  | 0.6 | 2.7  | 0.1 | 2.4 | 0.9 | 490.0  | 11.4 | 492.7  | 10.4 | 505.1  | 25.5  |
| K08-7-1-70.1  | 120.5 | 36138.4  | 1.1 | 17.4 | 2.2  | 0.6 | 3.2  | 0.1 | 2.3 | 0.7 | 493.2  | 11.0 | 497.0  | 12.6 | 514.2  | 48.5  |
| K08-7-1-3.1   | 281.4 | 35402.9  | 1.4 | 17.7 | 2.0  | 0.6 | 2.5  | 0.1 | 1.5 | 0.6 | 494.8  | 7.3  | 490.4  | 9.7  | 470.0  | 43.6  |
| K08-7-1-20.1  | 323.7 | 165810.8 | 8.8 | 17.5 | 0.8  | 0.7 | 3.1  | 0.1 | 2.9 | 1.0 | 515.6  | 14.6 | 511.6  | 12.3 | 493.7  | 18.5  |
| K08-7-1-76.1  | 136.0 | 21801.2  | 0.7 | 16.9 | 2.2  | 0.7 | 3.2  | 0.1 | 2.2 | 0.7 | 525.9  | 11.3 | 534.5  | 13.1 | 571.4  | 48.4  |
| K08-7-1-30.1  | 186.7 | 28302.4  | 1.5 | 17.3 | 1.6  | 0.7 | 2.6  | 0.1 | 2.1 | 0.8 | 537.1  | 10.8 | 533.6  | 10.8 | 518.9  | 34.2  |
| K08-7-1-52.1  | 104.1 | 44874.2  | 1.2 | 17.9 | 3.8  | 0.7 | 5.7  | 0.1 | 4.3 | 0.7 | 539.3  | 22.1 | 522.6  | 23.4 | 450.2  | 85.1  |
| K08-7-1-15.1  | 525.7 | 274975.3 | 4.3 | 17.0 | 0.7  | 0.7 | 1.6  | 0.1 | 1.4 | 0.9 | 557.7  | 7.7  | 558.7  | 6.8  | 562.6  | 14.5  |
| K08-7-1-32.1  | 188.3 | 107742.2 | 1.6 | 17.5 | 2.4  | 0.7 | 7.1  | 0.1 | 6.7 | 0.9 | 569.7  | 36.5 | 554.9  | 30.4 | 494.5  | 53.5  |
| K08-7-1-7.1   | 179.6 | 28053.7  | 1.7 | 16.8 | 2.2  | 0.8 | 2.6  | 0.1 | 1.4 | 0.5 | 602.1  | 8.1  | 597.6  | 11.8 | 580.4  | 47.7  |
| K08-7-1-56.1  | 392.7 | 10475.8  | 2.2 | 16.2 | 3.0  | 0.9 | 6.9  | 0.1 | 6.2 | 0.9 | 636.6  | 37.8 | 643.6  | 32.9 | 668.0  | 63.4  |
| K08-7-1-18.1  | 581.6 | 57999.4  | 2.1 | 15.4 | 1.9  | 1.0 | 6.1  | 0.1 | 5.8 | 0.9 | 699.4  | 38.3 | 716.1  | 31.3 | 768.7  | 41.0  |
| K08-7-1-59.1  | 135.2 | 140771.6 | 2.3 | 15.1 | 2.0  | 1.2 | 2.2  | 0.1 | 0.9 | 0.4 | 792.9  | 7.1  | 799.8  | 12.2 | 818.9  | 41.6  |
| K08-7-1-101.1 | 97.8  | 32724.5  | 1.0 | 15.4 | 2.3  | 1.2 | 2.9  | 0.1 | 1.7 | 0.6 | 798.2  | 12.5 | 790.6  | 15.7 | 769.2  | 48.9  |
| K08-7-1-68.1  | 239.8 | 19069.0  | 0.9 | 14.7 | 3.0  | 1.3 | 6.7  | 0.1 | 6.0 | 0.9 | 823.5  | 46.4 | 835.0  | 38.2 | 865.8  | 62.2  |
| K08-7-1-43.1  | 175.3 | 46847.7  | 1.2 | 14.9 | 1.9  | 1.3 | 2.6  | 0.1 | 1.8 | 0.7 | 848.5  | 14.1 | 847.6  | 15.0 | 845.5  | 39.9  |
| K08-7-1-73.1  | 158.8 | 72394.7  | 1.5 | 14.5 | 1.2  | 1.4 | 1.4  | 0.1 | 0.7 | 0.5 | 885.8  | 6.1  | 888.3  | 8.6  | 894.4  | 25.8  |
| K08-7-1-103.1 | 697.2 | 100197.0 | 6.1 | 8.9  | 0.6  | 4.6 | 2.7  | 0.3 | 2.6 | 1.0 | 1677.3 | 38.3 | 1747.1 | 22.2 | 1831.6 | 11.2  |
| K08-7-1-39.1  | 55.1  | 49874.5  | 1.0 | 8.8  | 1.0  | 5.4 | 1.6  | 0.3 | 1.2 | 0.8 | 1907.8 | 20.5 | 1882.8 | 13.7 | 1855.3 | 18.3  |
| K08-7-1-4.1   | 303.0 | 416487.9 | 1.5 | 8.8  | 0.3  | 5.5 | 4.6  | 0.4 | 4.6 | 1.0 | 1934.8 | 76.4 | 1898.5 | 39.3 | 1859.0 | 5.1   |

|                |       |          |     |      |      |      |      |     |      |     |        |      |        |       |         |        |
|----------------|-------|----------|-----|------|------|------|------|-----|------|-----|--------|------|--------|-------|---------|--------|
| K08-7-1-11.2   | 94.6  | 49849.1  | 0.7 | 8.8  | 0.3  | 5.2  | 1.9  | 0.3 | 1.8  | 1.0 | 1839.3 | 29.2 | 1849.5 | 15.8  | 1861.0  | 5.6    |
| K08-7-1-29.1   | 115.1 | 158510.3 | 1.6 | 8.8  | 0.6  | 5.2  | 1.8  | 0.3 | 1.6  | 0.9 | 1844.0 | 26.2 | 1852.8 | 15.0  | 1862.7  | 11.7   |
| K08-7-1-9.1    | 53.3  | 71342.9  | 0.9 | 6.4  | 1.0  | 8.2  | 2.7  | 0.4 | 2.5  | 0.9 | 2083.8 | 44.9 | 2257.2 | 24.6  | 2418.3  | 17.0   |
| K08-7-1-94-35  | 144.4 | 7309.3   | 2.0 | 25.5 | 48.9 | 0.0  | 49.3 | 0.0 | 6.3  | 0.1 | 54.3   | 3.4  | 45.4   | 21.9  | -398.3  | 1346.3 |
| <b>S10-2-5</b> |       |          |     |      |      |      |      |     |      |     |        |      |        |       |         |        |
| S10-2-5-2      | 174.9 | 12843.9  | 1.1 | 20.1 | 9.5  | 0.3  | 9.8  | 0.0 | 2.2  | 0.2 | 313.1  | 6.7  | 298.5  | 25.2  | 185.6   | 221.7  |
| S10-2-5-3      | 145.4 | 9982.8   | 1.1 | 18.1 | 5.6  | 0.6  | 7.2  | 0.1 | 4.6  | 0.6 | 464.7  | 20.5 | 457.3  | 26.6  | 419.8   | 124.6  |
| S10-2-5-4      | 204.0 | 28475.4  | 1.7 | 18.0 | 5.6  | 0.5  | 7.0  | 0.1 | 4.2  | 0.6 | 393.7  | 16.0 | 400.4  | 23.1  | 439.0   | 124.4  |
| S10-2-5-5      | 621.1 | 241820.0 | 5.0 | 17.2 | 1.3  | 0.6  | 2.5  | 0.1 | 2.1  | 0.9 | 474.3  | 9.7  | 485.2  | 9.5   | 536.6   | 27.5   |
| S10-2-5-6      | 101.3 | 10183.4  | 0.9 | 15.9 | 5.8  | 0.9  | 6.1  | 0.1 | 1.9  | 0.3 | 633.0  | 11.5 | 648.2  | 29.3  | 701.6   | 124.0  |
| S10-2-5-7      | 74.4  | 4653.4   | 1.9 | 19.3 | 10.5 | 0.4  | 10.8 | 0.1 | 2.7  | 0.3 | 389.2  | 10.2 | 373.0  | 33.7  | 273.4   | 240.2  |
| S10-2-5-8      | 255.6 | 17514.3  | 2.1 | 17.2 | 3.3  | 0.6  | 4.3  | 0.1 | 2.8  | 0.6 | 497.9  | 13.3 | 505.3  | 17.2  | 539.1   | 72.7   |
| S10-2-5-9      | 466.7 | 77430.5  | 2.0 | 17.0 | 1.6  | 0.7  | 7.3  | 0.1 | 7.1  | 1.0 | 521.2  | 35.7 | 527.4  | 30.1  | 554.2   | 35.7   |
| S10-2-5-10     | 343.1 | 7745.1   | 0.9 | 17.6 | 3.6  | 0.5  | 4.0  | 0.1 | 1.7  | 0.4 | 369.9  | 6.2  | 386.1  | 12.9  | 484.3   | 79.7   |
| <b>M09-5-3</b> |       |          |     |      |      |      |      |     |      |     |        |      |        |       |         |        |
| M09-5-3-11     | 44.6  | 1103.4   | 0.6 | 22.2 | 29.3 | 0.2  | 29.6 | 0.0 | 4.3  | 0.1 | 250.6  | 10.6 | 223.4  | 59.4  | -54.6   | 726.5  |
| M09-5-3-1      | 31.4  | 1008.9   | 1.0 | 17.6 | 44.9 | 0.3  | 48.4 | 0.0 | 18.0 | 0.4 | 242.1  | 42.8 | 266.6  | 114.0 | 487.6   | 1041.9 |
| M09-5-3-12     | 37.4  | 970.2    | 0.8 | 32.2 | 35.4 | 0.2  | 35.9 | 0.0 | 6.1  | 0.2 | 240.8  | 14.3 | 153.1  | 51.1  | -1058.2 | 1091.2 |
| M09-5-3-2      | 35.2  | 1086.8   | 0.9 | 27.9 | 41.6 | 0.2  | 43.6 | 0.0 | 13.2 | 0.3 | 252.5  | 32.7 | 182.8  | 73.1  | -644.6  | 1183.9 |
| M09-5-3-13     | 35.5  | 729.3    | 0.8 | 35.3 | 47.9 | 0.1  | 48.2 | 0.0 | 5.5  | 0.1 | 230.0  | 12.4 | 134.8  | 61.0  | -1336.5 | 1608.7 |
| M09-5-3-3      | 30.0  | 1133.0   | 0.8 | 78.1 | 80.3 | 0.1  | 80.8 | 0.0 | 8.6  | 0.1 | 241.0  | 20.2 | 66.1   | 51.8  | 0.0     | 389.9  |
| M09-5-3-4      | 19.6  | 616.8    | 1.0 | 16.3 | 59.4 | 0.4  | 61.9 | 0.0 | 17.5 | 0.3 | 269.9  | 46.4 | 313.9  | 168.8 | 655.4   | 1404.3 |
| M09-5-3-15     | 31.7  | 621.5    | 0.8 | 36.3 | 34.5 | 0.1  | 35.2 | 0.0 | 7.2  | 0.2 | 240.7  | 17.0 | 137.2  | 45.2  | -1426.0 | 1152.3 |
| M09-5-3-5      | 30.9  | 2040.9   | 0.8 | 21.5 | 57.6 | 0.2  | 60.0 | 0.0 | 16.9 | 0.3 | 239.9  | 39.7 | 221.2  | 119.8 | 26.6    | 1499.9 |
| M09-5-3-6      | 46.4  | 1619.2   | 0.7 | 23.4 | 28.9 | 0.2  | 30.1 | 0.0 | 8.4  | 0.3 | 250.5  | 20.6 | 212.8  | 57.8  | -186.0  | 734.3  |
| M09-5-3-7      | 37.6  | 818.8    | 0.8 | 23.9 | 23.9 | 0.2  | 26.5 | 0.0 | 11.4 | 0.4 | 240.1  | 27.0 | 201.2  | 48.4  | -233.6  | 609.5  |
| M09-5-3-8      | 37.6  | 994.2    | 0.7 | 26.3 | 27.0 | 0.2  | 29.4 | 0.0 | 11.7 | 0.4 | 241.0  | 27.6 | 184.5  | 49.6  | -488.6  | 727.0  |
| M09-5-3-9      | 29.7  | 484.9    | 0.9 | 47.2 | 44.4 | 0.1  | 45.7 | 0.0 | 10.7 | 0.2 | 223.0  | 23.5 | 99.5   | 43.3  | -2386.3 | 237.7  |
| M09-5-3-10     | 33.4  | 729.1    | 0.8 | 42.1 | 46.3 | 0.1  | 46.8 | 0.0 | 7.1  | 0.2 | 245.9  | 17.0 | 121.7  | 53.7  | -1945.6 | 49.9   |
| <b>M09-4-4</b> |       |          |     |      |      |      |      |     |      |     |        |      |        |       |         |        |
| M09-4-4-1      | 147.3 | 4201.2   | 1.1 | 19.9 | 5.0  | 0.5  | 5.4  | 0.1 | 2.0  | 0.4 | 412.5  | 8.1  | 383.5  | 17.2  | 212.0   | 115.5  |
| M09-4-4-2      | 175.4 | 29244.4  | 2.3 | 5.8  | 1.3  | 11.6 | 4.2  | 0.5 | 4.0  | 1.0 | 2548.2 | 83.9 | 2572.4 | 39.2  | 2591.6  | 21.4   |
| M09-4-4-3      | 140.0 | 3576.8   | 1.9 | 19.1 | 8.8  | 0.4  | 9.4  | 0.1 | 3.2  | 0.3 | 339.8  | 10.7 | 335.1  | 26.8  | 302.3   | 201.0  |
| M09-4-4-4      | 199.8 | 24370.9  | 2.5 | 8.7  | 0.5  | 5.1  | 3.4  | 0.3 | 3.3  | 1.0 | 1778.4 | 51.8 | 1828.1 | 28.5  | 1885.2  | 8.3    |
| M09-4-4-6      | 206.0 | 6059.5   | 1.4 | 17.7 | 4.4  | 0.6  | 5.2  | 0.1 | 2.7  | 0.5 | 496.0  | 12.9 | 490.7  | 20.1  | 465.9   | 97.4   |

|                |       |         |     |      |      |     |      |     |     |     |       |      |       |      |         |       |
|----------------|-------|---------|-----|------|------|-----|------|-----|-----|-----|-------|------|-------|------|---------|-------|
| M09-4-4-7      | 136.0 | 2049.4  | 1.2 | 20.8 | 7.3  | 0.3 | 12.0 | 0.0 | 9.5 | 0.8 | 302.1 | 28.2 | 280.5 | 29.5 | 104.5   | 173.1 |
| M09-4-4-8      | 272.5 | 3553.4  | 1.0 | 19.9 | 4.8  | 0.3 | 8.8  | 0.0 | 7.3 | 0.8 | 290.7 | 20.7 | 281.7 | 21.5 | 207.7   | 112.4 |
| M09-4-4-9      | 391.4 | 4384.5  | 1.8 | 19.8 | 5.4  | 0.3 | 5.9  | 0.0 | 2.4 | 0.4 | 285.1 | 6.8  | 277.8 | 14.3 | 216.6   | 124.2 |
| M09-4-4-10     | 190.1 | 2046.2  | 1.2 | 21.3 | 5.2  | 0.3 | 5.9  | 0.1 | 2.7 | 0.5 | 329.9 | 8.8  | 296.5 | 15.1 | 41.1    | 124.3 |
| M09-4-4-12     | 108.0 | 1939.7  | 2.8 | 18.5 | 4.7  | 0.6 | 5.3  | 0.1 | 2.5 | 0.5 | 479.2 | 11.4 | 462.0 | 19.6 | 377.4   | 105.1 |
| M09-4-4-13     | 236.5 | 5527.4  | 1.4 | 18.6 | 5.0  | 0.4 | 10.5 | 0.1 | 9.3 | 0.9 | 373.7 | 33.6 | 371.7 | 32.8 | 359.5   | 114.0 |
| M09-4-4-15     | 196.1 | 2643.2  | 1.4 | 19.5 | 5.1  | 0.4 | 5.3  | 0.1 | 1.1 | 0.2 | 361.3 | 3.9  | 346.8 | 15.5 | 251.0   | 118.4 |
| M09-4-4-17     | 132.5 | 1793.6  | 3.0 | 20.2 | 5.6  | 0.5 | 8.7  | 0.1 | 6.6 | 0.8 | 430.0 | 27.5 | 391.3 | 28.1 | 168.2   | 131.1 |
| M09-4-4-18     | 159.4 | 2126.5  | 2.3 | 19.3 | 7.8  | 0.4 | 8.4  | 0.1 | 3.2 | 0.4 | 320.5 | 10.1 | 314.8 | 22.8 | 272.9   | 178.1 |
| M09-4-4-20     | 318.5 | 3955.0  | 3.0 | 18.0 | 3.4  | 0.6 | 4.3  | 0.1 | 2.6 | 0.6 | 454.4 | 11.4 | 452.0 | 15.7 | 439.7   | 76.3  |
| M09-4-4-25     | 263.5 | 2048.7  | 2.1 | 20.1 | 4.5  | 0.4 | 5.9  | 0.1 | 3.9 | 0.7 | 390.8 | 14.7 | 361.8 | 18.0 | 180.3   | 104.3 |
| M09-4-4-27     | 222.0 | 1391.0  | 1.6 | 22.7 | 5.8  | 0.3 | 6.2  | 0.0 | 2.3 | 0.4 | 289.7 | 6.4  | 249.6 | 13.8 | -112.6  | 143.5 |
| M09-4-4-29     | 753.4 | 16193.3 | 2.4 | 16.9 | 1.2  | 0.7 | 4.7  | 0.1 | 4.5 | 1.0 | 506.6 | 22.0 | 518.8 | 19.0 | 573.0   | 26.0  |
| M09-4-4-30     | 993.0 | 12453.7 | 2.3 | 17.2 | 0.6  | 0.7 | 2.6  | 0.1 | 2.5 | 1.0 | 534.4 | 12.8 | 534.5 | 10.7 | 535.1   | 14.1  |
| M09-4-4-31     | 248.1 | 8340.9  | 1.0 | 15.8 | 7.6  | 0.4 | 7.8  | 0.0 | 1.7 | 0.2 | 306.3 | 5.2  | 360.3 | 23.8 | 724.4   | 162.4 |
| M09-4-4-32     | 82.4  | 622.8   | 1.3 | 34.1 | 19.3 | 0.2 | 19.6 | 0.0 | 3.3 | 0.2 | 272.3 | 8.9  | 163.4 | 29.6 | -1226.4 | 607.5 |
| <b>K09-7-7</b> |       |         |     |      |      |     |      |     |     |     |       |      |       |      |         |       |
| K09-7-7-1      | 139.7 | 4615.7  | 1.1 | 19.1 | 8.7  | 0.3 | 10.4 | 0.0 | 5.8 | 0.6 | 289.8 | 16.5 | 291.4 | 26.4 | 304.5   | 198.0 |
| K09-7-7-2      | 131.5 | 3461.6  | 0.8 | 20.9 | 12.3 | 0.3 | 12.6 | 0.0 | 2.7 | 0.2 | 287.5 | 7.5  | 267.5 | 29.5 | 95.9    | 291.4 |
| K09-7-7-3      | 136.7 | 7057.8  | 1.4 | 17.3 | 4.5  | 0.6 | 7.3  | 0.1 | 5.7 | 0.8 | 504.3 | 27.6 | 507.2 | 29.0 | 520.1   | 98.9  |
| K09-7-7-4      | 243.7 | 6903.9  | 1.2 | 19.1 | 3.0  | 0.5 | 6.0  | 0.1 | 5.2 | 0.9 | 397.7 | 20.1 | 384.2 | 19.3 | 303.8   | 69.0  |
| K09-7-7-5      | 235.1 | 5476.8  | 1.4 | 19.2 | 6.3  | 0.3 | 6.7  | 0.0 | 2.2 | 0.3 | 274.8 | 5.9  | 276.3 | 16.2 | 288.5   | 145.0 |
| K09-7-7-6      | 141.1 | 6699.8  | 1.6 | 17.1 | 7.2  | 0.7 | 10.3 | 0.1 | 7.4 | 0.7 | 519.3 | 36.9 | 525.2 | 42.2 | 551.0   | 156.4 |
| K09-7-7-7      | 492.6 | 15100.8 | 1.5 | 19.1 | 2.3  | 0.4 | 4.3  | 0.1 | 3.6 | 0.8 | 324.2 | 11.4 | 321.4 | 11.8 | 301.2   | 52.7  |
| K09-7-7-8      | 88.4  | 2216.6  | 0.9 | 22.7 | 18.2 | 0.3 | 18.3 | 0.0 | 2.2 | 0.1 | 282.9 | 6.1  | 244.8 | 39.9 | -106.2  | 450.3 |
| K09-7-7-9      | 560.6 | 27311.6 | 2.2 | 17.4 | 1.1  | 0.6 | 1.7  | 0.1 | 1.3 | 0.8 | 491.6 | 6.3  | 494.6 | 6.7  | 508.3   | 23.4  |
| K09-7-7-10     | 192.1 | 4024.4  | 2.6 | 16.6 | 23.5 | 0.4 | 23.7 | 0.0 | 3.0 | 0.1 | 286.6 | 8.4  | 324.7 | 65.9 | 607.5   | 514.6 |
| K09-7-7-13     | 136.6 | 2463.0  | 1.2 | 23.1 | 8.9  | 0.3 | 10.9 | 0.1 | 6.3 | 0.6 | 322.8 | 19.8 | 271.3 | 26.0 | -152.3  | 221.4 |
| K09-7-7-14     | 134.7 | 2917.8  | 1.0 | 20.8 | 5.8  | 0.4 | 7.0  | 0.1 | 4.0 | 0.6 | 345.5 | 13.3 | 315.7 | 19.0 | 101.1   | 136.3 |
| K09-7-7-15     | 255.3 | 4449.5  | 0.9 | 19.4 | 3.6  | 0.4 | 4.0  | 0.0 | 1.7 | 0.4 | 311.5 | 5.1  | 305.4 | 10.5 | 259.5   | 82.5  |
| K09-7-7-16     | 235.1 | 4439.3  | 1.4 | 19.3 | 8.2  | 0.3 | 9.6  | 0.0 | 5.0 | 0.5 | 285.7 | 13.9 | 284.4 | 23.8 | 273.6   | 188.3 |
| K09-7-7-17     | 142.1 | 2159.0  | 0.7 | 21.9 | 5.7  | 0.3 | 6.9  | 0.0 | 3.9 | 0.6 | 302.6 | 11.5 | 268.5 | 16.4 | -19.3   | 138.7 |
| K09-7-7-18     | 189.2 | 6317.8  | 1.1 | 17.5 | 3.0  | 0.6 | 3.2  | 0.1 | 1.1 | 0.3 | 499.2 | 5.4  | 498.7 | 12.8 | 496.4   | 67.2  |
| K09-7-7-20     | 288.8 | 8341.3  | 1.7 | 17.9 | 5.3  | 0.4 | 6.6  | 0.1 | 3.9 | 0.6 | 334.9 | 12.7 | 349.6 | 19.6 | 448.3   | 118.9 |
| K09-7-7-21     | 223.9 | 8130.6  | 0.8 | 16.6 | 16.6 | 0.4 | 17.1 | 0.0 | 3.8 | 0.2 | 276.8 | 10.3 | 315.8 | 46.3 | 614.2   | 361.5 |

|                |        |          |     |      |      |     |      |     |     |     |        |      |        |      |        |       |
|----------------|--------|----------|-----|------|------|-----|------|-----|-----|-----|--------|------|--------|------|--------|-------|
| K09-7-7-22     | 90.7   | 1319.9   | 1.4 | 24.8 | 13.7 | 0.3 | 14.0 | 0.0 | 2.7 | 0.2 | 286.5  | 7.7  | 228.8  | 28.6 | -329.8 | 353.2 |
| K09-7-7-23     | 102.7  | 2002.7   | 0.6 | 20.5 | 5.8  | 0.4 | 10.3 | 0.1 | 8.5 | 0.8 | 401.4  | 33.2 | 364.3  | 31.5 | 134.7  | 135.9 |
| K09-7-7-24     | 364.0  | 6861.0   | 1.2 | 18.9 | 2.3  | 0.3 | 3.3  | 0.0 | 2.3 | 0.7 | 298.9  | 6.7  | 302.6  | 8.5  | 330.8  | 52.9  |
| K09-7-7-25     | 229.6  | 3374.0   | 1.7 | 20.5 | 4.4  | 0.3 | 5.1  | 0.0 | 2.7 | 0.5 | 296.3  | 7.7  | 279.2  | 12.5 | 138.1  | 102.2 |
| <b>K08-034</b> |        |          |     |      |      |     |      |     |     |     |        |      |        |      |        |       |
| K08-034-1      | 460.1  | 90505.7  | 3.7 | 17.4 | 1.0  | 0.7 | 1.5  | 0.1 | 1.1 | 0.8 | 511.5  | 5.5  | 511.6  | 6.0  | 512.3  | 21.3  |
| K08-034-2      | 117.2  | 2062.7   | 1.7 | 17.5 | 11.9 | 0.4 | 12.2 | 0.1 | 2.9 | 0.2 | 332.9  | 9.3  | 354.6  | 36.6 | 498.5  | 262.7 |
| K08-034-3      | 320.6  | 35854.0  | 1.7 | 18.6 | 2.4  | 0.4 | 2.9  | 0.1 | 1.6 | 0.6 | 366.7  | 5.8  | 365.6  | 8.9  | 359.1  | 54.2  |
| K08-034-4      | 89.0   | 12634.5  | 3.1 | 18.6 | 16.7 | 0.4 | 17.1 | 0.1 | 3.8 | 0.2 | 316.1  | 11.8 | 321.0  | 47.1 | 357.2  | 378.8 |
| K08-034-5      | 94.6   | 12269.8  | 0.7 | 18.6 | 13.2 | 0.4 | 14.6 | 0.0 | 6.3 | 0.4 | 312.7  | 19.2 | 317.8  | 39.9 | 355.4  | 298.8 |
| K08-034-6      | 582.6  | 32895.3  | 0.7 | 19.0 | 2.5  | 0.3 | 3.5  | 0.0 | 2.4 | 0.7 | 240.2  | 5.6  | 246.5  | 7.6  | 307.0  | 57.1  |
| K08-034-8      | 61.3   | 5050.5   | 0.5 | 9.1  | 2.2  | 4.6 | 5.4  | 0.3 | 4.9 | 0.9 | 1698.0 | 73.6 | 1744.4 | 44.9 | 1800.5 | 39.2  |
| K08-034-9      | 503.5  | 443930.9 | 2.1 | 8.4  | 1.6  | 5.5 | 5.3  | 0.3 | 5.1 | 1.0 | 1878.1 | 82.9 | 1908.0 | 45.8 | 1940.6 | 27.8  |
| K08-034-10     | 93.3   | 6616.9   | 1.6 | 20.2 | 13.7 | 0.3 | 13.9 | 0.0 | 2.7 | 0.2 | 258.6  | 6.9  | 249.7  | 30.9 | 166.9  | 320.9 |
| K08-034-11     | 396.4  | 112186.6 | 0.2 | 19.1 | 1.5  | 0.3 | 2.3  | 0.0 | 1.7 | 0.7 | 244.1  | 4.1  | 250.1  | 5.1  | 306.7  | 34.6  |
| K08-3-4-1      | 1402.8 | 19288.7  | 2.6 | 19.3 | 0.7  | 0.3 | 2.5  | 0.0 | 2.4 | 1.0 | 263.1  | 6.3  | 264.1  | 5.9  | 272.7  | 17.0  |
| K08-3-4-2      | 382.7  | 5285.2   | 1.5 | 19.7 | 2.2  | 0.3 | 2.9  | 0.0 | 1.9 | 0.7 | 261.7  | 4.9  | 259.1  | 6.7  | 235.9  | 51.1  |
| K08-3-4-3      | 650.5  | 11162.3  | 1.4 | 19.0 | 1.1  | 0.3 | 3.1  | 0.0 | 2.9 | 0.9 | 277.4  | 7.8  | 280.8  | 7.6  | 309.0  | 25.9  |
| K08-3-4-4      | 405.8  | 5279.9   | 2.4 | 20.4 | 2.7  | 0.3 | 2.9  | 0.0 | 1.0 | 0.3 | 264.3  | 2.5  | 253.3  | 6.5  | 152.3  | 63.9  |
| K08-3-4-5      | 289.8  | 5259.4   | 2.3 | 19.5 | 2.3  | 0.4 | 2.8  | 0.1 | 1.6 | 0.6 | 366.8  | 5.8  | 351.6  | 8.4  | 253.0  | 53.1  |
| K08-3-4-6      | 227.1  | 3481.4   | 0.7 | 20.1 | 4.9  | 0.3 | 5.0  | 0.0 | 1.0 | 0.2 | 271.6  | 2.6  | 263.1  | 11.6 | 187.9  | 114.1 |
| K08-3-4-7      | 160.5  | 3343.1   | 1.8 | 19.7 | 3.7  | 0.5 | 4.3  | 0.1 | 2.2 | 0.5 | 417.5  | 9.0  | 389.4  | 13.9 | 226.1  | 85.2  |
| K08-3-4-8      | 768.9  | 11711.7  | 2.6 | 19.3 | 1.0  | 0.3 | 1.4  | 0.0 | 1.1 | 0.7 | 295.9  | 3.0  | 294.4  | 3.7  | 282.9  | 22.1  |
| K08-3-4-9      | 190.0  | 2467.8   | 1.0 | 21.3 | 4.7  | 0.3 | 4.9  | 0.0 | 1.3 | 0.3 | 261.2  | 3.4  | 240.9  | 10.4 | 48.2   | 111.8 |
| K08-3-4-10     | 77.8   | 1344.4   | 0.9 | 23.4 | 12.5 | 0.3 | 12.7 | 0.0 | 2.2 | 0.2 | 281.6  | 6.0  | 237.3  | 26.9 | -181.5 | 313.2 |
| K08-3-4-11     | 247.6  | 6299.7   | 1.7 | 18.3 | 2.3  | 0.5 | 3.2  | 0.1 | 2.1 | 0.7 | 438.4  | 9.0  | 432.4  | 11.1 | 400.1  | 52.3  |
| K08-3-4-12     | 206.1  | 4219.7   | 1.4 | 19.5 | 3.6  | 0.3 | 5.4  | 0.0 | 4.0 | 0.7 | 276.6  | 10.8 | 274.4  | 12.9 | 256.1  | 82.2  |
| K08-3-4-13     | 424.7  | 14810.2  | 2.9 | 17.2 | 2.5  | 0.6 | 3.2  | 0.1 | 1.9 | 0.6 | 474.7  | 8.5  | 486.0  | 12.2 | 539.6  | 55.7  |
| K08-3-4-14     | 164.9  | 4522.8   | 1.1 | 20.0 | 6.1  | 0.3 | 6.5  | 0.0 | 2.4 | 0.4 | 255.3  | 6.1  | 249.8  | 14.5 | 197.8  | 141.1 |
| K08-3-4-15     | 391.4  | 8190.3   | 1.3 | 19.0 | 1.5  | 0.4 | 2.8  | 0.1 | 2.3 | 0.8 | 353.6  | 7.8  | 348.5  | 8.1  | 314.9  | 35.0  |
| K08-3-4-16     | 386.8  | 5228.6   | 2.0 | 20.1 | 1.3  | 0.3 | 2.7  | 0.0 | 2.4 | 0.9 | 259.3  | 6.1  | 251.9  | 6.1  | 183.4  | 31.0  |
| K08-3-4-16     | 313.8  | 4560.6   | 1.9 | 20.1 | 2.7  | 0.3 | 5.6  | 0.0 | 4.8 | 0.9 | 269.7  | 12.8 | 261.1  | 12.8 | 184.0  | 63.7  |
| K08-3-4-17     | 197.6  | 3541.8   | 1.5 | 20.3 | 7.2  | 0.3 | 7.4  | 0.0 | 1.9 | 0.3 | 305.3  | 5.6  | 288.8  | 18.6 | 157.3  | 168.0 |
| K08-3-4-18     | 231.0  | 3774.1   | 2.9 | 20.5 | 4.6  | 0.3 | 5.3  | 0.0 | 2.6 | 0.5 | 290.0  | 7.4  | 273.6  | 12.7 | 136.0  | 108.6 |
| K08-3-4-20     | 411.2  | 5137.4   | 4.1 | 20.2 | 5.2  | 0.3 | 6.1  | 0.0 | 3.3 | 0.5 | 292.1  | 9.4  | 279.1  | 14.9 | 171.5  | 120.8 |

|                |        |          |      |      |      |      |      |     |     |     |        |      |        |      |        |       |
|----------------|--------|----------|------|------|------|------|------|-----|-----|-----|--------|------|--------|------|--------|-------|
| K08-3-4-21     | 187.5  | 3769.1   | 1.5  | 20.0 | 2.9  | 0.4  | 3.4  | 0.1 | 1.8 | 0.5 | 343.6  | 6.1  | 325.0  | 9.6  | 193.8  | 67.7  |
| K08-3-4-22     | 381.9  | 5000.0   | 1.9  | 20.6 | 2.6  | 0.3  | 3.1  | 0.0 | 1.7 | 0.6 | 265.8  | 4.5  | 252.5  | 6.9  | 130.6  | 60.2  |
| K08-3-4-23     | 291.4  | 20559.7  | 1.8  | 18.0 | 3.1  | 0.3  | 3.3  | 0.0 | 1.1 | 0.3 | 262.4  | 2.9  | 279.9  | 8.0  | 428.8  | 68.3  |
| K08-3-4-23     | 80.9   | 2983.6   | 1.3  | 18.5 | 17.0 | 0.4  | 17.1 | 0.0 | 1.9 | 0.1 | 301.5  | 5.6  | 310.3  | 45.6 | 377.0  | 383.8 |
| K08-3-4-26     | 237.3  | 3880.5   | 8.6  | 20.6 | 3.0  | 0.3  | 4.1  | 0.1 | 2.7 | 0.7 | 318.6  | 8.4  | 296.8  | 10.4 | 128.8  | 71.3  |
| K08-3-4-28     | 479.8  | 10087.1  | 1.2  | 19.3 | 1.5  | 0.4  | 2.5  | 0.1 | 2.0 | 0.8 | 327.2  | 6.4  | 321.0  | 6.9  | 276.0  | 34.5  |
| K08-3-4-29     | 72.4   | 1234.1   | 0.8  | 24.8 | 12.2 | 0.2  | 13.2 | 0.0 | 5.2 | 0.4 | 271.3  | 13.9 | 217.2  | 25.9 | -334.8 | 314.0 |
| <b>K08-032</b> |        |          |      |      |      |      |      |     |     |     |        |      |        |      |        |       |
| K08-032-2      | 141.8  | 45713.9  | 1.6  | 9.8  | 0.8  | 4.1  | 3.2  | 0.3 | 3.1 | 1.0 | 1638.7 | 44.4 | 1650.7 | 25.8 | 1666.0 | 14.2  |
| K08-032-6      | 147.7  | 24303.2  | 1.5  | 5.0  | 0.3  | 14.5 | 3.2  | 0.5 | 3.2 | 1.0 | 2721.8 | 70.6 | 2781.6 | 30.4 | 2825.3 | 5.0   |
| K08-032-7      | 124.2  | 16753.6  | 1.7  | 5.4  | 0.6  | 12.8 | 1.4  | 0.5 | 1.3 | 0.9 | 2602.5 | 27.9 | 2662.0 | 13.5 | 2707.6 | 9.8   |
| K08-032-8      | 363.5  | 16427.8  | 2.5  | 19.5 | 5.7  | 0.3  | 5.9  | 0.0 | 1.7 | 0.3 | 261.3  | 4.4  | 260.8  | 13.6 | 256.0  | 130.5 |
| K08-032-10     | 367.6  | 13957.2  | 1.9  | 13.8 | 1.5  | 1.6  | 3.2  | 0.2 | 2.9 | 0.9 | 978.1  | 26.1 | 985.9  | 20.4 | 1003.4 | 30.3  |
| K08-032-11     | 253.6  | 33573.5  | 2.9  | 17.6 | 2.7  | 0.6  | 3.7  | 0.1 | 2.5 | 0.7 | 493.2  | 11.9 | 490.9  | 14.5 | 480.0  | 60.5  |
| K08-032-13     | 91.1   | 93121.6  | 0.7  | 5.4  | 0.6  | 13.1 | 3.7  | 0.5 | 3.6 | 1.0 | 2658.4 | 79.2 | 2686.1 | 34.8 | 2707.0 | 9.7   |
| K08-032-14     | 104.5  | 9952.2   | 1.7  | 17.1 | 6.3  | 0.5  | 6.9  | 0.1 | 2.6 | 0.4 | 411.2  | 10.5 | 433.1  | 24.3 | 551.8  | 138.7 |
| K08-032-15     | 239.9  | 22404.7  | 10.0 | 12.6 | 1.2  | 2.1  | 4.1  | 0.2 | 3.9 | 1.0 | 1145.6 | 40.7 | 1159.2 | 28.1 | 1184.8 | 23.7  |
| K08-032-18     | 186.8  | 43676.6  | 3.9  | 11.2 | 1.6  | 2.9  | 2.1  | 0.2 | 1.4 | 0.7 | 1363.1 | 17.5 | 1379.5 | 16.2 | 1405.1 | 30.7  |
| K08-032-19     | 142.3  | 69640.7  | 1.9  | 11.4 | 1.0  | 2.9  | 1.8  | 0.2 | 1.5 | 0.8 | 1367.1 | 18.7 | 1372.3 | 13.7 | 1380.2 | 19.3  |
| <b>D10-5-5</b> |        |          |      |      |      |      |      |     |     |     |        |      |        |      |        |       |
| D10-5-5-2      | 391.8  | 26685.2  | 1.2  | 19.7 | 3.1  | 0.3  | 9.3  | 0.0 | 8.8 | 0.9 | 264.6  | 22.8 | 261.3  | 21.5 | 231.9  | 71.1  |
| D10-5-5-3      | 119.1  | 10416.1  | 1.6  | 20.7 | 10.6 | 0.3  | 11.0 | 0.1 | 2.8 | 0.3 | 314.8  | 8.6  | 291.7  | 27.9 | 110.1  | 251.6 |
| D10-5-5-4      | 925.2  | 149738.1 | 2.0  | 18.1 | 1.2  | 0.5  | 2.4  | 0.1 | 2.1 | 0.9 | 393.3  | 8.1  | 397.8  | 8.0  | 424.3  | 26.7  |
| D10-5-5-5      | 251.2  | 40759.3  | 1.4  | 18.5 | 5.9  | 0.4  | 6.3  | 0.1 | 2.2 | 0.3 | 332.8  | 7.0  | 338.4  | 18.1 | 377.2  | 133.2 |
| D10-5-5-7      | 1083.1 | 271007.8 | 1.8  | 17.2 | 0.5  | 0.7  | 10.0 | 0.1 | 9.9 | 1.0 | 540.9  | 51.6 | 538.9  | 41.7 | 530.7  | 9.9   |
| D10-5-5-8      | 286.1  | 21646.2  | 1.2  | 8.8  | 0.4  | 5.1  | 1.6  | 0.3 | 1.6 | 1.0 | 1794.6 | 24.3 | 1828.9 | 13.5 | 1868.2 | 6.7   |
| D10-5-5-9      | 369.2  | 146545.5 | 1.5  | 17.5 | 2.2  | 0.7  | 3.2  | 0.1 | 2.3 | 0.7 | 512.2  | 11.5 | 508.8  | 12.8 | 493.6  | 48.0  |
| D10-5-5-10     | 665.8  | 105974.5 | 1.2  | 18.2 | 1.0  | 0.5  | 4.1  | 0.1 | 4.0 | 1.0 | 390.8  | 15.2 | 392.8  | 13.5 | 404.3  | 22.7  |
| D10-5-5-11     | 311.8  | 320190.7 | 1.9  | 8.8  | 0.7  | 5.3  | 1.9  | 0.3 | 1.8 | 0.9 | 1857.0 | 29.2 | 1861.9 | 16.4 | 1867.2 | 11.8  |
| D10-5-5-12     | 232.9  | 29754.4  | 1.3  | 19.0 | 8.3  | 0.4  | 9.5  | 0.0 | 4.7 | 0.5 | 304.4  | 13.9 | 306.0  | 25.1 | 317.9  | 187.9 |
| D10-5-5-13     | 118.5  | 17058.4  | 1.8  | 17.6 | 4.2  | 0.6  | 4.6  | 0.1 | 1.7 | 0.4 | 490.4  | 8.2  | 489.8  | 17.7 | 486.9  | 93.2  |
| D10-5-5-14     | 406.0  | 63471.7  | 2.3  | 17.4 | 2.8  | 0.6  | 8.3  | 0.1 | 7.8 | 0.9 | 509.4  | 38.0 | 508.3  | 33.0 | 503.6  | 62.0  |
| D10-5-5-15     | 79.4   | 60686.1  | 1.6  | 8.7  | 1.6  | 5.4  | 2.1  | 0.3 | 1.3 | 0.6 | 1881.8 | 21.3 | 1881.0 | 18.0 | 1880.2 | 29.7  |
| D10-5-5-16     | 174.5  | 318129.2 | 1.6  | 8.8  | 0.5  | 5.4  | 2.8  | 0.3 | 2.8 | 1.0 | 1899.9 | 46.2 | 1881.4 | 24.3 | 1861.0 | 8.3   |
| D10-5-5-17     | 86.7   | 6299.8   | 0.8  | 22.2 | 22.3 | 0.3  | 22.8 | 0.0 | 4.5 | 0.2 | 262.4  | 11.7 | 232.9  | 47.5 | -55.3  | 549.8 |

**A10-10-2**

|             |       |         |     |      |      |     |      |     |     |     |        |      |        |       |        |       |
|-------------|-------|---------|-----|------|------|-----|------|-----|-----|-----|--------|------|--------|-------|--------|-------|
| A10-10-2-2  | 363.5 | 15853.5 | 1.1 | 19.6 | 5.6  | 0.3 | 5.8  | 0.0 | 1.4 | 0.2 | 254.1  | 3.5  | 253.2  | 13.0  | 245.8  | 129.3 |
| A10-10-2-4  | 242.1 | 45927.9 | 1.8 | 17.5 | 2.8  | 0.6 | 3.6  | 0.1 | 2.2 | 0.6 | 475.7  | 10.2 | 480.4  | 13.7  | 502.8  | 61.2  |
| A10-10-2-5  | 75.7  | 25900.7 | 1.4 | 8.8  | 1.2  | 5.0 | 1.5  | 0.3 | 1.0 | 0.6 | 1787.6 | 15.3 | 1816.6 | 13.0  | 1850.1 | 21.3  |
| A10-10-2-6  | 72.1  | 9506.2  | 2.1 | 18.2 | 9.6  | 0.6 | 10.0 | 0.1 | 3.0 | 0.3 | 479.4  | 14.0 | 467.9  | 37.7  | 412.0  | 214.6 |
| A10-10-2-7  | 291.9 | 49025.0 | 2.9 | 17.7 | 2.5  | 0.6 | 2.8  | 0.1 | 1.0 | 0.4 | 476.2  | 4.8  | 475.9  | 10.5  | 474.4  | 56.4  |
| A10-10-2-8  | 60.4  | 2307.4  | 1.6 | 23.5 | 23.7 | 0.3 | 24.3 | 0.0 | 5.5 | 0.2 | 306.0  | 16.5 | 254.3  | 54.8  | -198.5 | 600.9 |
| A10-10-2-10 | 181.6 | 30625.6 | 6.7 | 17.6 | 3.8  | 0.6 | 4.2  | 0.1 | 1.6 | 0.4 | 496.4  | 7.8  | 493.6  | 16.3  | 480.5  | 85.1  |
| A10-10-2-11 | 235.1 | 18095.3 | 0.9 | 19.4 | 4.4  | 0.3 | 5.7  | 0.0 | 3.7 | 0.6 | 257.6  | 9.2  | 258.1  | 13.0  | 263.2  | 100.4 |
| A10-10-2-13 | 90.1  | 4593.8  | 0.6 | 20.5 | 18.7 | 0.3 | 19.1 | 0.0 | 4.2 | 0.2 | 274.8  | 11.3 | 261.1  | 44.1  | 139.7  | 441.6 |
| A10-10-2-15 | 137.0 | 6394.0  | 0.6 | 20.1 | 9.0  | 0.3 | 9.6  | 0.0 | 3.2 | 0.3 | 259.8  | 8.1  | 252.0  | 21.3  | 179.7  | 210.3 |
| A10-10-2-16 | 304.4 | 42630.5 | 2.4 | 15.2 | 1.5  | 1.2 | 9.5  | 0.1 | 9.4 | 1.0 | 798.6  | 70.5 | 798.3  | 52.6  | 797.5  | 31.1  |
| A10-10-2-17 | 231.2 | 15625.5 | 1.1 | 19.3 | 5.4  | 0.3 | 6.0  | 0.0 | 2.6 | 0.4 | 279.7  | 7.0  | 279.4  | 14.6  | 276.5  | 124.2 |
| A10-10-2-18 | 351.2 | 19682.9 | 0.9 | 19.7 | 4.8  | 0.3 | 5.2  | 0.0 | 1.9 | 0.4 | 267.2  | 5.0  | 263.1  | 12.0  | 226.6  | 111.6 |
| A10-10-2-19 | 170.5 | 20974.6 | 1.2 | 16.0 | 3.3  | 0.9 | 4.4  | 0.1 | 2.9 | 0.7 | 644.9  | 17.7 | 654.3  | 21.1  | 686.8  | 70.4  |
| A10-10-2-20 | 482.4 | 15542.9 | 2.6 | 19.0 | 2.6  | 0.4 | 4.1  | 0.1 | 3.3 | 0.8 | 327.6  | 10.4 | 326.2  | 11.6  | 316.4  | 58.3  |
| A10-10-2-21 | 102.3 | 5609.4  | 0.5 | 19.6 | 13.3 | 0.3 | 14.0 | 0.0 | 4.4 | 0.3 | 264.6  | 11.3 | 261.9  | 32.4  | 237.5  | 309.0 |
| A10-10-2-22 | 275.1 | 26850.8 | 1.2 | 19.0 | 3.8  | 0.4 | 4.6  | 0.1 | 2.6 | 0.6 | 322.6  | 8.1  | 321.9  | 12.7  | 316.7  | 86.3  |
| A10-10-2-23 | 89.9  | 7414.8  | 0.8 | 21.3 | 14.1 | 0.3 | 15.1 | 0.0 | 5.5 | 0.4 | 264.4  | 14.3 | 243.6  | 32.8  | 47.5   | 338.0 |
| A10-10-2-24 | 625.6 | 24315.4 | 1.5 | 18.6 | 3.2  | 0.4 | 3.6  | 0.0 | 1.6 | 0.4 | 308.3  | 4.8  | 315.0  | 9.7   | 365.0  | 72.2  |
| A10-10-2-25 | 73.1  | 14525.7 | 1.1 | 14.7 | 5.0  | 1.4 | 6.9  | 0.1 | 4.7 | 0.7 | 885.1  | 39.0 | 882.2  | 40.7  | 874.9  | 104.5 |
| A10-10-2-26 | 279.2 | 12253.5 | 1.4 | 19.1 | 2.4  | 0.4 | 3.6  | 0.1 | 2.7 | 0.8 | 344.9  | 9.2  | 338.9  | 10.5  | 297.7  | 54.2  |
| A10-10-2-27 | 80.5  | 2134.9  | 0.4 | 14.1 | 37.3 | 0.4 | 37.4 | 0.0 | 2.6 | 0.1 | 280.6  | 7.1  | 366.6  | 115.4 | 954.4  | 789.2 |
| A10-10-2-28 | 649.3 | 35717.8 | 3.3 | 18.8 | 2.1  | 0.4 | 7.0  | 0.1 | 6.7 | 1.0 | 323.7  | 21.0 | 325.6  | 19.4  | 338.9  | 47.5  |
| A10-10-2-29 | 171.9 | 3376.2  | 1.0 | 18.1 | 11.8 | 0.3 | 12.1 | 0.0 | 2.7 | 0.2 | 253.1  | 6.8  | 271.0  | 28.8  | 427.8  | 264.2 |
| A10-10-2-30 | 325.1 | 25284.1 | 1.2 | 17.9 | 2.7  | 0.6 | 4.4  | 0.1 | 3.5 | 0.8 | 461.6  | 15.5 | 458.6  | 16.3  | 443.1  | 60.6  |
| A10-10-2-34 | 145.4 | 65090.3 | 1.5 | 8.7  | 1.0  | 5.2 | 2.4  | 0.3 | 2.2 | 0.9 | 1850.9 | 35.2 | 1859.3 | 20.4  | 1868.8 | 17.5  |
| A10-10-2-35 | 302.2 | 8963.9  | 1.3 | 19.3 | 5.4  | 0.4 | 7.7  | 0.1 | 5.5 | 0.7 | 355.9  | 19.0 | 345.8  | 22.5  | 278.3  | 122.8 |
| A10-10-2-36 | 181.7 | 7738.9  | 0.7 | 19.1 | 7.8  | 0.3 | 9.7  | 0.0 | 5.9 | 0.6 | 266.9  | 15.4 | 270.3  | 23.1  | 299.7  | 177.1 |
| A10-10-2-37 | 77.7  | 4783.5  | 2.0 | 20.4 | 9.0  | 0.5 | 9.4  | 0.1 | 2.5 | 0.3 | 459.9  | 11.0 | 411.8  | 31.7  | 150.3  | 211.7 |
| A10-10-2-38 | 85.7  | 2052.4  | 0.6 | 23.1 | 15.8 | 0.2 | 16.5 | 0.0 | 4.6 | 0.3 | 262.9  | 11.9 | 224.9  | 33.3  | -155.9 | 395.3 |
| A10-10-2-39 | 291.1 | 16790.9 | 3.5 | 17.3 | 3.2  | 0.6 | 4.9  | 0.1 | 3.7 | 0.8 | 483.7  | 17.3 | 489.4  | 19.0  | 516.2  | 69.9  |
| A10-10-2-40 | 545.4 | 19642.1 | 1.7 | 18.8 | 1.8  | 0.4 | 3.0  | 0.0 | 2.4 | 0.8 | 310.7  | 7.2  | 313.6  | 8.1   | 335.0  | 41.8  |
| A10-10-2-41 | 179.2 | 10288.2 | 2.2 | 17.9 | 4.7  | 0.6 | 5.0  | 0.1 | 1.8 | 0.4 | 516.1  | 9.1  | 504.2  | 19.9  | 450.6  | 103.3 |
| A10-10-2-42 | 438.2 | 27201.2 | 2.4 | 17.5 | 1.9  | 0.7 | 2.8  | 0.1 | 2.0 | 0.7 | 513.8  | 10.0 | 510.0  | 11.2  | 493.2  | 42.8  |
| A10-10-2-43 | 289.1 | 14572.8 | 1.8 | 18.4 | 4.1  | 0.5 | 5.7  | 0.1 | 3.9 | 0.7 | 392.8  | 14.8 | 391.5  | 18.4  | 383.9  | 93.0  |



|                |       |         |     |      |      |     |      |     |     |     |        |       |        |      |        |       |
|----------------|-------|---------|-----|------|------|-----|------|-----|-----|-----|--------|-------|--------|------|--------|-------|
| A10-10-2-44    | 507.7 | 19118.3 | 0.7 | 18.9 | 2.2  | 0.3 | 2.3  | 0.0 | 0.8 | 0.4 | 293.6  | 2.3   | 296.5  | 6.0  | 319.8  | 49.4  |
| A10-10-2-45    | 389.1 | 25209.1 | 0.6 | 18.8 | 4.1  | 0.3 | 7.4  | 0.0 | 6.1 | 0.8 | 253.1  | 15.2  | 261.5  | 17.0 | 337.8  | 93.5  |
| A10-10-2-46    | 282.4 | 14990.1 | 1.3 | 17.4 | 2.6  | 0.6 | 3.1  | 0.1 | 1.6 | 0.5 | 504.7  | 7.8   | 504.5  | 12.2 | 503.7  | 57.6  |
| A10-10-2-47    | 971.3 | 57854.5 | 1.4 | 17.4 | 1.0  | 0.6 | 1.8  | 0.1 | 1.5 | 0.8 | 480.2  | 7.0   | 484.3  | 7.0  | 503.4  | 22.2  |
| A10-10-2-48    | 261.5 | 27121.4 | 1.7 | 17.7 | 2.8  | 0.6 | 4.9  | 0.1 | 4.0 | 0.8 | 493.1  | 18.8  | 488.4  | 18.9 | 466.2  | 63.0  |
| A10-10-2-49    | 741.3 | 27301.7 | 1.3 | 18.8 | 1.2  | 0.4 | 1.9  | 0.0 | 1.5 | 0.8 | 304.0  | 4.4   | 308.5  | 5.1  | 342.5  | 26.7  |
| <b>A10-3-3</b> |       |         |     |      |      |     |      |     |     |     |        |       |        |      |        |       |
| A10-3-3-2      | 81.9  | 4317.0  | 0.4 | 20.1 | 18.3 | 0.3 | 19.3 | 0.0 | 6.1 | 0.3 | 265.9  | 15.8  | 257.5  | 43.9 | 181.6  | 430.1 |
| A10-3-3-3      | 35.5  | 3523.5  | 3.4 | 17.5 | 15.2 | 0.6 | 16.0 | 0.1 | 4.7 | 0.3 | 483.9  | 22.0  | 486.6  | 61.8 | 499.4  | 337.6 |
| A10-3-3-4      | 85.4  | 5012.4  | 0.5 | 24.8 | 34.1 | 0.2 | 34.8 | 0.0 | 7.1 | 0.2 | 257.5  | 17.9  | 207.6  | 65.5 | -327.8 | 898.2 |
| A10-3-3-5      | 237.8 | 14568.4 | 1.6 | 19.1 | 3.1  | 0.3 | 3.7  | 0.0 | 1.9 | 0.5 | 265.5  | 5.0   | 269.3  | 8.6  | 302.6  | 71.0  |
| A10-3-3-6      | 242.2 | 18307.7 | 1.0 | 19.8 | 4.6  | 0.3 | 5.8  | 0.0 | 3.5 | 0.6 | 259.2  | 8.9   | 255.2  | 13.0 | 218.8  | 105.8 |
| A10-3-3-7      | 161.3 | 7868.6  | 0.6 | 16.6 | 10.5 | 0.3 | 11.4 | 0.0 | 4.4 | 0.4 | 249.6  | 10.7  | 288.0  | 28.5 | 612.3  | 227.5 |
| A10-3-3-8      | 261.6 | 18091.1 | 1.5 | 20.0 | 5.7  | 0.3 | 6.1  | 0.0 | 2.1 | 0.4 | 264.2  | 5.5   | 257.6  | 13.8 | 197.7  | 132.3 |
| A10-3-3-10     | 100.4 | 8954.5  | 1.3 | 17.1 | 9.1  | 0.6 | 9.6  | 0.1 | 3.2 | 0.3 | 478.8  | 15.0  | 489.9  | 37.4 | 542.3  | 198.6 |
| A10-3-3-11     | 155.7 | 13851.6 | 2.0 | 18.0 | 3.0  | 0.6 | 4.7  | 0.1 | 3.6 | 0.8 | 495.5  | 17.3  | 484.7  | 18.2 | 433.8  | 67.7  |
| A10-3-3-13     | 113.3 | 32273.1 | 1.8 | 15.2 | 2.5  | 1.2 | 3.6  | 0.1 | 2.6 | 0.7 | 819.2  | 20.0  | 813.6  | 20.3 | 798.2  | 52.9  |
| A10-3-3-15     | 285.7 | 23011.3 | 1.7 | 19.2 | 3.3  | 0.4 | 3.7  | 0.1 | 1.7 | 0.5 | 318.8  | 5.2   | 315.8  | 10.0 | 293.9  | 75.4  |
| A10-3-3-16     | 110.4 | 21653.8 | 1.3 | 16.0 | 2.9  | 1.0 | 3.7  | 0.1 | 2.2 | 0.6 | 717.5  | 15.0  | 711.5  | 18.8 | 692.6  | 62.4  |
| A10-3-3-17     | 134.2 | 29469.8 | 2.7 | 18.4 | 4.1  | 0.6 | 4.8  | 0.1 | 2.5 | 0.5 | 467.8  | 11.1  | 454.6  | 17.4 | 388.1  | 91.4  |
| A10-3-3-19     | 142.0 | 13619.7 | 2.5 | 17.8 | 5.9  | 0.6 | 7.0  | 0.1 | 3.8 | 0.5 | 496.7  | 18.0  | 490.5  | 27.3 | 461.5  | 131.6 |
| A10-3-3-20     | 225.8 | 22641.8 | 1.8 | 18.8 | 3.4  | 0.5 | 5.2  | 0.1 | 3.9 | 0.7 | 388.7  | 14.6  | 382.0  | 16.5 | 341.4  | 78.0  |
| A10-3-3-20-TIP | 170.0 | 25022.4 | 2.1 | 18.9 | 5.2  | 0.4 | 5.4  | 0.1 | 1.4 | 0.3 | 384.5  | 5.4   | 376.1  | 16.9 | 324.9  | 117.4 |
| A10-3-3-22     | 152.6 | 99347.3 | 2.1 | 8.7  | 0.5  | 5.3 | 7.3  | 0.3 | 7.3 | 1.0 | 1873.3 | 118.1 | 1873.3 | 62.3 | 1873.2 | 9.5   |
| A10-3-3-24     | 678.0 | 49668.0 | 1.5 | 19.1 | 2.0  | 0.4 | 3.1  | 0.0 | 2.4 | 0.8 | 307.9  | 7.1   | 306.9  | 8.2  | 298.9  | 46.1  |
| A10-3-3-25     | 145.0 | 20473.9 | 2.1 | 15.2 | 1.4  | 1.2 | 3.3  | 0.1 | 3.0 | 0.9 | 828.7  | 23.5  | 821.6  | 18.8 | 802.2  | 29.9  |
| A10-3-3-26     | 86.1  | 4474.2  | 1.2 | 19.3 | 12.2 | 0.3 | 13.1 | 0.0 | 4.7 | 0.4 | 272.5  | 12.5  | 272.5  | 31.2 | 272.9  | 280.2 |
| A10-3-3-28     | 134.1 | 7377.9  | 0.7 | 19.1 | 7.5  | 0.3 | 8.1  | 0.0 | 3.0 | 0.4 | 256.2  | 7.4   | 260.3  | 18.5 | 297.6  | 171.1 |
| A10-3-3-29     | 109.8 | 5675.9  | 0.6 | 19.5 | 10.2 | 0.3 | 10.7 | 0.0 | 3.4 | 0.3 | 264.1  | 8.7   | 262.8  | 24.8 | 251.2  | 234.2 |
| A10-3-3-30     | 303.5 | 54733.7 | 3.6 | 17.3 | 1.7  | 0.7 | 4.7  | 0.1 | 4.4 | 0.9 | 509.2  | 21.7  | 511.3  | 19.1 | 520.5  | 37.4  |
| A10-3-3-31     | 163.4 | 6497.1  | 0.7 | 20.2 | 6.2  | 0.3 | 7.1  | 0.0 | 3.4 | 0.5 | 270.4  | 9.1   | 260.0  | 16.2 | 167.1  | 144.4 |
| A10-3-3-34     | 67.0  | 1790.6  | 0.9 | 27.5 | 21.7 | 0.2 | 22.9 | 0.0 | 7.3 | 0.3 | 271.2  | 19.3  | 197.9  | 41.2 | -605.5 | 595.6 |
| A10-3-3-35     | 448.7 | 53078.5 | 1.2 | 17.2 | 2.0  | 0.7 | 6.1  | 0.1 | 5.8 | 0.9 | 528.1  | 29.3  | 528.8  | 25.2 | 531.7  | 43.6  |
| A10-3-3-36     | 144.0 | 6499.7  | 0.9 | 20.3 | 7.5  | 0.3 | 7.8  | 0.0 | 1.9 | 0.2 | 271.1  | 5.0   | 259.8  | 17.8 | 158.7  | 176.7 |
| A10-3-3-37     | 155.9 | 7512.5  | 1.1 | 21.6 | 7.8  | 0.3 | 10.1 | 0.0 | 6.3 | 0.6 | 287.8  | 17.9  | 259.6  | 23.0 | 12.2   | 187.7 |

|            |        |          |      |      |      |     |      |     |     |     |        |      |        |      |        |       |
|------------|--------|----------|------|------|------|-----|------|-----|-----|-----|--------|------|--------|------|--------|-------|
| A10-3-3-38 | 159.1  | 57431.0  | 2.7  | 8.8  | 0.6  | 5.4 | 1.6  | 0.3 | 1.5 | 0.9 | 1902.8 | 24.8 | 1881.0 | 13.9 | 1857.1 | 10.6  |
| A10-3-3-39 | 69.8   | 4676.4   | 1.0  | 18.4 | 11.5 | 0.4 | 12.6 | 0.0 | 5.3 | 0.4 | 296.3  | 15.2 | 306.5  | 33.4 | 384.9  | 258.3 |
| A10-3-3-41 | 295.8  | 17550.0  | 4.4  | 18.8 | 3.0  | 0.4 | 6.2  | 0.1 | 5.4 | 0.9 | 334.9  | 17.6 | 335.0  | 17.7 | 336.0  | 68.5  |
| A10-3-3-42 | 128.1  | 5825.7   | 1.1  | 21.5 | 10.4 | 0.3 | 11.7 | 0.0 | 5.3 | 0.5 | 254.6  | 13.3 | 233.3  | 24.4 | 24.0   | 250.4 |
| A10-3-3-43 | 872.7  | 101015.5 | 4.1  | 17.6 | 0.6  | 0.6 | 1.9  | 0.1 | 1.8 | 1.0 | 448.3  | 7.9  | 454.0  | 7.0  | 483.4  | 12.7  |
| A10-3-3-45 | 216.3  | 22371.9  | 1.7  | 17.8 | 2.1  | 0.6 | 3.7  | 0.1 | 3.1 | 0.8 | 469.3  | 14.0 | 467.2  | 14.0 | 456.5  | 46.7  |
| A10-3-3-46 | 300.0  | 30116.1  | 2.2  | 17.8 | 2.2  | 0.6 | 4.3  | 0.1 | 3.7 | 0.9 | 444.9  | 15.9 | 447.6  | 15.6 | 461.5  | 48.9  |
| A10-3-3-47 | 50.3   | 2873.2   | 0.4  | 23.2 | 17.6 | 0.2 | 19.4 | 0.0 | 8.2 | 0.4 | 264.8  | 21.2 | 226.3  | 39.4 | -157.7 | 440.0 |
| A10-3-3-48 | 103.0  | 12833.5  | 3.2  | 18.0 | 3.8  | 0.6 | 6.2  | 0.1 | 5.0 | 0.8 | 467.1  | 22.4 | 461.9  | 23.1 | 436.2  | 83.6  |
| A10-3-3-49 | 184.7  | 16185.3  | 5.1  | 18.0 | 3.7  | 0.6 | 4.5  | 0.1 | 2.5 | 0.6 | 471.3  | 11.4 | 465.1  | 16.7 | 434.6  | 82.7  |
| A10-3-3-50 | 371.2  | 44427.1  | 14.9 | 17.5 | 1.3  | 0.6 | 3.6  | 0.1 | 3.3 | 0.9 | 487.5  | 15.6 | 489.4  | 13.9 | 498.5  | 29.6  |
| A10-3-3-51 | 1242.3 | 141289.7 | 2.8  | 17.4 | 0.7  | 0.6 | 1.6  | 0.1 | 1.4 | 0.9 | 483.7  | 6.5  | 489.0  | 6.1  | 513.6  | 16.0  |
| A10-3-3-53 | 530.1  | 33939.9  | 2.4  | 17.5 | 1.1  | 0.6 | 2.9  | 0.1 | 2.7 | 0.9 | 486.3  | 12.6 | 487.9  | 11.2 | 495.4  | 24.2  |
| A10-3-3-52 | 86.1   | 28643.4  | 3.9  | 15.4 | 2.9  | 1.2 | 3.0  | 0.1 | 1.0 | 0.3 | 783.2  | 7.3  | 780.6  | 16.4 | 773.3  | 60.0  |
| A10-3-3-54 | 253.4  | 28559.7  | 1.1  | 17.6 | 2.3  | 0.6 | 6.9  | 0.1 | 6.6 | 0.9 | 457.5  | 29.0 | 461.3  | 25.7 | 480.3  | 49.9  |
| A10-3-3-55 | 66.9   | 6711.9   | 2.5  | 18.2 | 9.9  | 0.5 | 10.8 | 0.1 | 4.2 | 0.4 | 438.5  | 17.8 | 434.4  | 38.0 | 412.4  | 222.0 |
| A10-3-3-56 | 78.2   | 13623.0  | 1.6  | 17.6 | 5.8  | 0.6 | 7.5  | 0.1 | 4.7 | 0.6 | 471.5  | 21.4 | 474.2  | 28.3 | 487.4  | 128.1 |
| A10-3-3-57 | 303.3  | 102144.0 | 3.1  | 9.1  | 5.8  | 4.3 | 11.3 | 0.3 | 9.7 | 0.9 | 1627.9 | 139  | 1701.4 | 93.5 | 1793.1 | 106.2 |
| A10-3-3-58 | 51.1   | 3838.5   | 0.4  | 21.2 | 29.4 | 0.3 | 30.1 | 0.0 | 6.1 | 0.2 | 262.4  | 15.6 | 242.8  | 65.0 | 57.4   | 715.3 |
| A10-3-3-59 | 227.7  | 15968.3  | 1.5  | 20.3 | 4.7  | 0.3 | 5.0  | 0.0 | 1.6 | 0.3 | 253.9  | 4.0  | 244.8  | 10.9 | 158.8  | 110.8 |
| A10-3-3-60 | 164.5  | 14219.0  | 0.5  | 16.6 | 3.7  | 0.6 | 4.8  | 0.1 | 3.1 | 0.7 | 463.3  | 14.1 | 488.1  | 18.7 | 606.3  | 79.1  |
| A10-3-3-61 | 81.7   | 15396.7  | 1.6  | 17.3 | 5.4  | 0.6 | 6.5  | 0.1 | 3.6 | 0.6 | 496.3  | 17.4 | 501.8  | 25.7 | 527.3  | 117.9 |
| A10-3-3-62 | 91.8   | 3713.5   | 0.8  | 21.6 | 10.3 | 0.3 | 11.0 | 0.0 | 3.6 | 0.3 | 272.0  | 9.6  | 246.3  | 24.0 | 8.1    | 249.4 |
| A10-3-3-63 | 408.8  | 35350.0  | 4.3  | 18.8 | 2.5  | 0.4 | 3.4  | 0.0 | 2.3 | 0.7 | 312.5  | 6.9  | 314.9  | 9.1  | 332.8  | 56.7  |
| A10-3-3-64 | 344.3  | 56679.5  | 1.4  | 17.5 | 2.2  | 0.6 | 3.3  | 0.1 | 2.4 | 0.7 | 508.2  | 11.9 | 505.5  | 13.2 | 493.2  | 49.2  |
| A10-3-3-65 | 449.0  | 41614.5  | 8.6  | 17.6 | 1.2  | 0.6 | 2.3  | 0.1 | 1.9 | 0.8 | 473.4  | 8.8  | 474.4  | 8.7  | 479.6  | 26.8  |
| A10-3-3-66 | 134.6  | 27453.6  | 1.4  | 17.7 | 6.1  | 0.6 | 6.4  | 0.1 | 2.0 | 0.3 | 485.8  | 9.3  | 483.3  | 24.6 | 471.9  | 134.7 |
| A10-3-3-67 | 45.1   | 3130.7   | 0.7  | 21.9 | 38.3 | 0.3 | 38.7 | 0.0 | 6.1 | 0.2 | 253.1  | 15.2 | 228.7  | 79.5 | -15.1  | 955.5 |
| A10-3-3-68 | 69.2   | 52756.8  | 1.7  | 8.7  | 0.8  | 5.2 | 1.6  | 0.3 | 1.3 | 0.8 | 1844.4 | 21.1 | 1857.6 | 13.3 | 1872.5 | 15.2  |
| A10-3-3-70 | 405.6  | 143687.6 | 2.5  | 11.9 | 1.4  | 2.6 | 3.5  | 0.2 | 3.2 | 0.9 | 1315.6 | 38.5 | 1308.8 | 25.9 | 1297.8 | 27.1  |
| A10-3-3-71 | 227.7  | 18213.1  | 2.7  | 18.0 | 3.4  | 0.5 | 5.3  | 0.1 | 4.1 | 0.8 | 424.0  | 16.7 | 426.5  | 18.5 | 440.0  | 76.4  |
| A10-3-3-73 | 714.6  | 111463.6 | 5.3  | 17.7 | 1.0  | 0.6 | 2.5  | 0.1 | 2.3 | 0.9 | 445.5  | 9.9  | 449.9  | 9.1  | 472.3  | 21.6  |
| A10-3-3-74 | 144.7  | 15462.0  | 0.7  | 19.3 | 7.6  | 0.4 | 8.3  | 0.0 | 3.5 | 0.4 | 310.5  | 10.6 | 306.2  | 22.0 | 273.8  | 173.6 |
| A10-3-3-75 | 144.1  | 20910.1  | 6.9  | 18.0 | 4.6  | 0.4 | 5.7  | 0.1 | 3.3 | 0.6 | 352.0  | 11.4 | 364.0  | 17.4 | 440.5  | 102.6 |
| A10-3-3-76 | 267.3  | 19020.0  | 1.4  | 19.5 | 4.1  | 0.3 | 6.0  | 0.0 | 4.4 | 0.7 | 299.1  | 12.9 | 294.4  | 15.5 | 257.1  | 94.9  |
| A10-3-3-77 | 134.4  | 22539.1  | 2.6  | 16.7 | 3.1  | 0.7 | 4.9  | 0.1 | 3.8 | 0.8 | 511.8  | 18.5 | 527.7  | 20.1 | 597.2  | 67.2  |

|                 |        |          |     |      |      |     |      |     |      |     |       |      |       |      |       |       |
|-----------------|--------|----------|-----|------|------|-----|------|-----|------|-----|-------|------|-------|------|-------|-------|
| A10-3-3-79      | 287.2  | 27153.2  | 3.1 | 17.6 | 1.4  | 0.6 | 2.9  | 0.1 | 2.5  | 0.9 | 475.9 | 11.4 | 476.4 | 10.9 | 478.7 | 32.0  |
| A10-3-3-80      | 96.2   | 5787.1   | 1.0 | 20.7 | 16.6 | 0.3 | 18.6 | 0.0 | 8.4  | 0.4 | 263.3 | 21.6 | 249.3 | 41.2 | 120.0 | 394.4 |
| A10-3-3-81      | 79.2   | 2493.4   | 0.7 | 20.2 | 8.3  | 0.3 | 9.3  | 0.0 | 4.2  | 0.5 | 270.9 | 11.1 | 260.5 | 21.3 | 168.4 | 193.5 |
| A10-3-3-82      | 32.9   | 3779.4   | 1.6 | 18.8 | 23.6 | 0.5 | 24.2 | 0.1 | 5.3  | 0.2 | 447.0 | 23.1 | 428.6 | 84.8 | 331.2 | 541.8 |
| A10-3-3-83      | 350.3  | 37487.6  | 2.7 | 18.0 | 2.0  | 0.5 | 5.5  | 0.1 | 5.1  | 0.9 | 442.2 | 21.9 | 442.0 | 19.7 | 440.8 | 44.2  |
| A10-3-3-86      | 385.7  | 36766.6  | 4.1 | 18.9 | 2.6  | 0.4 | 4.4  | 0.0 | 3.5  | 0.8 | 312.6 | 10.8 | 314.5 | 11.9 | 329.0 | 59.1  |
| A10-3-3-88      | 182.3  | 10185.0  | 1.3 | 19.6 | 3.3  | 0.4 | 5.6  | 0.1 | 4.6  | 0.8 | 320.3 | 14.3 | 310.6 | 15.0 | 238.2 | 75.5  |
| A10-3-3-89      | 461.6  | 45797.2  | 2.7 | 17.2 | 2.0  | 0.6 | 7.9  | 0.1 | 7.7  | 1.0 | 461.3 | 34.2 | 472.9 | 30.0 | 529.9 | 42.9  |
| A10-3-3-90      | 145.2  | 13497.2  | 1.4 | 17.6 | 3.5  | 0.6 | 4.8  | 0.1 | 3.4  | 0.7 | 453.8 | 14.7 | 458.4 | 17.8 | 481.8 | 76.7  |
| A10-3-3-91      | 696.7  | 54274.8  | 1.4 | 18.9 | 0.9  | 0.4 | 3.6  | 0.1 | 3.5  | 1.0 | 317.3 | 10.8 | 318.7 | 9.8  | 328.8 | 20.3  |
| A10-3-3-93      | 54.7   | 3616.1   | 1.8 | 19.9 | 11.4 | 0.3 | 15.1 | 0.0 | 10.0 | 0.7 | 304.9 | 29.7 | 293.7 | 38.6 | 205.0 | 264.8 |
| A10-3-3-94      | 149.2  | 6293.4   | 2.3 | 20.1 | 6.4  | 0.3 | 7.1  | 0.1 | 3.1  | 0.4 | 315.4 | 9.5  | 300.2 | 18.5 | 184.2 | 149.6 |
| A10-3-3-95      | 109.1  | 8835.3   | 0.5 | 19.4 | 11.8 | 0.3 | 12.3 | 0.0 | 3.3  | 0.3 | 271.6 | 8.7  | 271.0 | 29.2 | 266.2 | 272.0 |
| A10-3-3-96      | 392.5  | 59510.9  | 1.4 | 18.6 | 2.7  | 0.4 | 5.8  | 0.1 | 5.2  | 0.9 | 350.3 | 17.6 | 351.7 | 17.3 | 361.5 | 60.0  |
| A10-3-3-97      | 113.9  | 7989.5   | 1.7 | 18.5 | 6.8  | 0.6 | 7.1  | 0.1 | 2.0  | 0.3 | 466.3 | 9.0  | 451.5 | 25.8 | 376.8 | 153.1 |
| A10-3-3-98      | 182.8  | 9165.9   | 1.6 | 17.6 | 7.0  | 0.4 | 7.2  | 0.1 | 1.7  | 0.2 | 325.0 | 5.3  | 345.3 | 21.0 | 483.6 | 154.3 |
| A10-3-3-99      | 130.4  | 9561.4   | 0.6 | 20.1 | 9.7  | 0.3 | 13.3 | 0.0 | 9.1  | 0.7 | 262.6 | 23.4 | 254.8 | 30.0 | 184.5 | 225.6 |
| A10-3-3-99      | 155.4  | 6702.4   | 1.0 | 21.4 | 10.1 | 0.3 | 10.5 | 0.0 | 2.8  | 0.3 | 266.9 | 7.4  | 245.0 | 22.9 | 39.5  | 242.7 |
| A10-3-3-101     | 1074.8 | 86276.5  | 1.4 | 18.8 | 1.2  | 0.4 | 2.8  | 0.1 | 2.5  | 0.9 | 322.8 | 8.0  | 324.4 | 7.7  | 336.4 | 26.5  |
| A10-3-3-102     | 164.0  | 14180.9  | 2.7 | 17.9 | 2.8  | 0.6 | 3.6  | 0.1 | 2.2  | 0.6 | 496.7 | 10.5 | 487.8 | 13.8 | 446.0 | 62.5  |
| A10-3-3-7.1     | 32.5   | 2847.4   | 0.2 | 20.6 | 20.3 | 0.3 | 21.6 | 0.0 | 7.6  | 0.4 | 265.3 | 19.8 | 252.1 | 48.4 | 130.3 | 481.0 |
| A10-3-3-2.1     | 109.2  | 6056.6   | 0.9 | 18.7 | 5.2  | 0.3 | 6.6  | 0.0 | 4.0  | 0.6 | 272.9 | 10.7 | 281.5 | 16.2 | 353.4 | 118.3 |
| A10-3-3-1.1     | 497.8  | 12606.5  | 1.1 | 18.8 | 2.4  | 0.3 | 3.5  | 0.0 | 2.6  | 0.7 | 289.5 | 7.4  | 294.2 | 9.0  | 331.8 | 53.7  |
| A10-3-3-4.1     | 155.8  | 26271.6  | 1.1 | 19.6 | 3.9  | 0.3 | 4.5  | 0.0 | 2.2  | 0.5 | 305.8 | 6.6  | 298.9 | 11.5 | 245.4 | 89.1  |
| A10-3-3-3.1     | 526.7  | 27035.0  | 1.6 | 18.8 | 1.5  | 0.4 | 7.9  | 0.1 | 7.7  | 1.0 | 317.4 | 23.8 | 319.1 | 21.5 | 331.3 | 34.9  |
| A10-3-3-5.1     | 213.2  | 6611.5   | 1.3 | 18.4 | 3.6  | 0.4 | 6.8  | 0.1 | 5.8  | 0.9 | 336.1 | 19.0 | 342.6 | 19.8 | 387.3 | 80.2  |
| A10-3-3-6.1     | 39.9   | 4977.2   | 1.2 | 21.9 | 21.4 | 0.4 | 21.7 | 0.1 | 3.7  | 0.2 | 371.7 | 13.4 | 322.1 | 59.9 | -22.5 | 522.1 |
| A10-3-3-8.1     | 266.7  | 22383.7  | 1.7 | 18.3 | 3.3  | 0.5 | 3.8  | 0.1 | 1.9  | 0.5 | 397.6 | 7.2  | 398.5 | 12.6 | 403.7 | 74.6  |
| <b>K09-13-5</b> |        |          |     |      |      |     |      |     |      |     |       |      |       |      |       |       |
| K09-13-5-4.4    | 101.7  | 5995.9   | 0.5 | 20.9 | 6.7  | 0.3 | 7.3  | 0.0 | 2.9  | 0.4 | 254.4 | 7.1  | 239.6 | 15.6 | 97.0  | 159.1 |
| K09-13-5-1.9    | 93.2   | 6937.7   | 0.7 | 19.7 | 12.8 | 0.3 | 12.9 | 0.0 | 1.7  | 0.1 | 256.4 | 4.3  | 253.3 | 29.0 | 225.2 | 296.8 |
| K09-13-5-3.7    | 188.2  | 9423.2   | 0.6 | 18.8 | 4.5  | 0.3 | 5.3  | 0.0 | 2.8  | 0.5 | 256.4 | 7.0  | 264.0 | 12.4 | 332.4 | 102.7 |
| K09-13-5-1.1    | 395.9  | 129227.2 | 0.8 | 19.1 | 2.3  | 0.3 | 2.6  | 0.0 | 1.2  | 0.5 | 259.7 | 3.1  | 264.1 | 6.1  | 303.0 | 52.7  |
| K09-13-5-3.1    | 220.3  | 22237.8  | 0.9 | 19.1 | 3.8  | 0.3 | 4.1  | 0.0 | 1.7  | 0.4 | 263.8 | 4.3  | 267.7 | 9.8  | 301.3 | 86.5  |
| K09-13-5-6.2    | 86.9   | 16762.6  | 0.5 | 20.4 | 12.3 | 0.3 | 13.0 | 0.0 | 4.2  | 0.3 | 267.3 | 11.1 | 255.2 | 29.3 | 145.7 | 288.5 |

|                |       |          |     |      |      |     |      |     |     |     |       |      |       |      |       |       |
|----------------|-------|----------|-----|------|------|-----|------|-----|-----|-----|-------|------|-------|------|-------|-------|
| K09-13-5-2.6   | 203.1 | 69420.6  | 1.0 | 19.0 | 5.1  | 0.3 | 5.6  | 0.0 | 2.4 | 0.4 | 267.6 | 6.2  | 272.3 | 13.4 | 313.3 | 115.7 |
| K09-13-5-4.10  | 96.4  | 15854.0  | 1.0 | 16.3 | 29.7 | 0.4 | 30.5 | 0.0 | 6.7 | 0.2 | 268.9 | 17.6 | 312.8 | 82.2 | 653.8 | 650.9 |
| K09-13-5-2.4   | 128.9 | 14248.4  | 0.7 | 20.1 | 6.5  | 0.3 | 7.0  | 0.0 | 2.7 | 0.4 | 269.7 | 7.1  | 260.7 | 16.2 | 180.7 | 151.2 |
| K09-13-5-4.7   | 260.3 | 43300.8  | 0.7 | 19.5 | 5.9  | 0.3 | 8.0  | 0.0 | 5.4 | 0.7 | 270.7 | 14.4 | 269.5 | 19.0 | 259.4 | 136.1 |
| K09-13-5-5.2   | 118.3 | 23358.8  | 0.7 | 18.7 | 6.3  | 0.3 | 6.8  | 0.0 | 2.5 | 0.4 | 272.7 | 6.8  | 281.0 | 16.7 | 350.2 | 142.4 |
| K09-13-5-6.8   | 152.2 | 13169.0  | 1.4 | 18.8 | 2.1  | 0.3 | 2.4  | 0.0 | 1.2 | 0.5 | 274.4 | 3.2  | 280.7 | 5.9  | 333.4 | 46.9  |
| K09-13-5-3.3   | 84.1  | 23047.3  | 0.5 | 19.1 | 8.0  | 0.3 | 8.4  | 0.0 | 2.5 | 0.3 | 275.8 | 6.9  | 278.1 | 20.4 | 297.6 | 182.9 |
| K09-13-5-4.10A | 74.9  | 19627.2  | 1.0 | 17.0 | 9.6  | 0.4 | 10.7 | 0.0 | 4.8 | 0.4 | 278.5 | 13.2 | 311.1 | 28.8 | 562.7 | 209.6 |
| K09-13-5-6.5   | 41.2  | 3692.7   | 0.3 | 16.0 | 17.7 | 0.4 | 18.5 | 0.0 | 5.5 | 0.3 | 283.4 | 15.2 | 332.7 | 52.5 | 693.7 | 379.2 |
| K09-13-5-2.7   | 68.8  | 7564.6   | 0.5 | 19.0 | 11.9 | 0.3 | 13.3 | 0.0 | 6.0 | 0.4 | 284.8 | 16.7 | 287.7 | 33.4 | 311.0 | 272.4 |
| K09-13-5-1.3   | 59.3  | 5726.8   | 0.7 | 20.0 | 12.1 | 0.3 | 12.4 | 0.0 | 2.5 | 0.2 | 285.7 | 6.9  | 275.5 | 29.9 | 190.1 | 282.9 |
| K09-13-5-1.8   | 355.1 | 26073.7  | 2.0 | 19.6 | 2.4  | 0.3 | 3.8  | 0.0 | 3.0 | 0.8 | 287.5 | 8.3  | 282.2 | 9.4  | 238.4 | 56.1  |
| K09-13-5-6.3   | 109.3 | 7319.7   | 0.9 | 18.0 | 9.1  | 0.4 | 9.5  | 0.0 | 2.6 | 0.3 | 289.9 | 7.5  | 307.0 | 25.1 | 439.1 | 202.9 |
| K09-13-5-4.1   | 69.5  | 4144.8   | 0.2 | 18.2 | 14.5 | 0.4 | 14.7 | 0.0 | 2.5 | 0.2 | 300.2 | 7.4  | 312.4 | 39.6 | 404.3 | 326.6 |
| K09-13-5-2.9   | 432.6 | 53234.6  | 1.3 | 19.2 | 1.6  | 0.3 | 2.7  | 0.0 | 2.2 | 0.8 | 301.9 | 6.5  | 301.1 | 7.1  | 294.7 | 36.5  |
| K09-13-5-6.6   | 323.1 | 2825.7   | 1.1 | 17.2 | 10.0 | 0.4 | 10.2 | 0.0 | 2.1 | 0.2 | 301.9 | 6.1  | 329.5 | 28.8 | 528.8 | 219.7 |
| K09-13-5-5.10  | 274.4 | 41289.1  | 1.9 | 19.3 | 3.2  | 0.3 | 6.0  | 0.0 | 5.1 | 0.8 | 302.6 | 15.0 | 300.2 | 15.5 | 282.2 | 72.4  |
| K09-13-5-4.8   | 236.7 | 17434.1  | 1.3 | 19.4 | 3.0  | 0.3 | 3.5  | 0.0 | 1.7 | 0.5 | 304.5 | 5.1  | 300.0 | 9.0  | 265.2 | 68.9  |
| K09-13-5-1.10  | 91.9  | 12663.9  | 1.0 | 19.7 | 5.3  | 0.3 | 6.1  | 0.1 | 3.0 | 0.5 | 314.6 | 9.3  | 304.6 | 16.1 | 228.6 | 122.4 |
| K09-13-5-3.8   | 33.1  | 2999.4   | 2.5 | 19.6 | 22.4 | 0.4 | 23.0 | 0.1 | 5.3 | 0.2 | 315.9 | 16.3 | 307.0 | 61.1 | 240.0 | 522.6 |
| K09-13-5-5.5   | 551.1 | 80220.2  | 0.8 | 19.0 | 1.0  | 0.4 | 2.5  | 0.1 | 2.3 | 0.9 | 316.4 | 7.0  | 316.4 | 6.8  | 316.8 | 23.7  |
| K09-13-5-5.4   | 41.5  | 3291.6   | 0.4 | 19.7 | 18.4 | 0.4 | 18.8 | 0.1 | 3.7 | 0.2 | 319.2 | 11.5 | 308.5 | 50.1 | 228.3 | 429.0 |
| K09-13-5-3.9   | 132.7 | 1358.3   | 0.7 | 17.0 | 8.8  | 0.4 | 9.5  | 0.1 | 3.6 | 0.4 | 322.3 | 11.4 | 353.4 | 28.5 | 562.8 | 192.5 |
| K09-13-5-3.6   | 239.2 | 15745.9  | 1.8 | 19.0 | 2.1  | 0.4 | 4.9  | 0.1 | 4.4 | 0.9 | 323.4 | 13.9 | 322.0 | 13.5 | 312.0 | 47.9  |
| K09-13-5-2.8   | 258.2 | 3747.2   | 1.2 | 16.2 | 20.4 | 0.4 | 20.6 | 0.1 | 2.8 | 0.1 | 329.7 | 9.1  | 375.8 | 64.8 | 670.5 | 440.8 |
| K09-13-5-5.7   | 143.8 | 31686.3  | 1.7 | 19.2 | 5.5  | 0.4 | 5.7  | 0.1 | 1.6 | 0.3 | 335.8 | 5.3  | 330.4 | 16.1 | 292.1 | 125.0 |
| K09-13-5-5.3   | 309.3 | 19354.2  | 1.8 | 19.2 | 6.4  | 0.4 | 11.5 | 0.1 | 9.6 | 0.8 | 340.9 | 31.8 | 334.7 | 32.9 | 292.2 | 147.2 |
| K09-13-5-3.2   | 471.7 | 80352.8  | 1.8 | 18.3 | 1.7  | 0.5 | 3.9  | 0.1 | 3.6 | 0.9 | 402.7 | 13.9 | 402.7 | 13.0 | 402.3 | 37.0  |
| K09-13-5-1.1   | 205.2 | 9162.4   | 2.1 | 17.6 | 2.3  | 0.6 | 2.7  | 0.1 | 1.5 | 0.5 | 462.5 | 6.5  | 465.2 | 10.2 | 478.5 | 51.3  |
| K09-13-5-5.6   | 675.1 | 62704.7  | 0.7 | 17.5 | 0.5  | 0.6 | 3.1  | 0.1 | 3.1 | 1.0 | 472.2 | 13.9 | 477.5 | 11.8 | 502.9 | 10.7  |
| K09-13-5-4.3   | 251.6 | 96075.9  | 2.4 | 17.4 | 1.5  | 0.6 | 2.4  | 0.1 | 1.8 | 0.8 | 476.3 | 8.5  | 482.7 | 9.3  | 512.9 | 33.9  |
| K09-13-5-5.1   | 429.2 | 90804.7  | 1.4 | 17.6 | 1.5  | 0.6 | 3.1  | 0.1 | 2.8 | 0.9 | 478.5 | 12.8 | 479.3 | 12.0 | 483.1 | 32.2  |
| K09-13-5-1.5   | 56.2  | 25053.5  | 1.9 | 17.4 | 7.2  | 0.6 | 7.5  | 0.1 | 2.1 | 0.3 | 485.1 | 9.9  | 489.3 | 29.1 | 509.3 | 158.3 |
| K09-13-5-4.6   | 137.2 | 42537.8  | 1.4 | 18.0 | 4.9  | 0.6 | 5.2  | 0.1 | 1.7 | 0.3 | 487.5 | 8.0  | 477.6 | 19.8 | 430.5 | 109.2 |
| K09-13-5-6.1   | 212.4 | 80416.1  | 1.2 | 17.3 | 1.7  | 0.6 | 3.3  | 0.1 | 2.8 | 0.9 | 491.8 | 13.3 | 496.7 | 13.0 | 518.9 | 38.0  |
| K09-13-5-4.2   | 663.5 | 202769.6 | 2.8 | 17.5 | 0.9  | 0.6 | 4.0  | 0.1 | 3.9 | 1.0 | 498.5 | 18.7 | 498.6 | 15.7 | 499.0 | 19.3  |

|               |       |          |      |      |      |     |      |     |     |     |        |      |        |      |        |       |
|---------------|-------|----------|------|------|------|-----|------|-----|-----|-----|--------|------|--------|------|--------|-------|
| K09-13-5-4.9  | 463.8 | 71167.5  | 2.1  | 17.4 | 0.9  | 0.6 | 2.3  | 0.1 | 2.1 | 0.9 | 501.1  | 9.9  | 502.6  | 9.0  | 509.3  | 20.8  |
| K09-13-5-3.10 | 47.2  | 19604.5  | 2.5  | 18.9 | 12.1 | 0.6 | 12.3 | 0.1 | 1.9 | 0.2 | 507.7  | 9.3  | 476.5  | 46.7 | 328.7  | 275.8 |
| K09-13-5-2.2  | 294.1 | 48464.5  | 2.5  | 17.8 | 1.5  | 0.6 | 3.5  | 0.1 | 3.2 | 0.9 | 507.7  | 15.6 | 498.6  | 13.9 | 456.6  | 33.5  |
| K09-13-5-6.7  | 380.8 | 56996.8  | 2.4  | 17.4 | 0.9  | 0.7 | 1.5  | 0.1 | 1.2 | 0.8 | 511.2  | 5.8  | 511.5  | 5.9  | 512.9  | 19.4  |
| K09-13-5-4.5  | 194.3 | 62396.4  | 3.2  | 17.6 | 1.3  | 0.6 | 2.8  | 0.1 | 2.5 | 0.9 | 512.2  | 12.3 | 506.8  | 11.3 | 482.9  | 29.6  |
| K09-13-5-2.3  | 263.9 | 49873.1  | 20.3 | 17.6 | 1.8  | 0.6 | 2.6  | 0.1 | 1.9 | 0.7 | 512.9  | 9.3  | 507.5  | 10.5 | 483.3  | 40.2  |
| K09-13-5-2.10 | 482.8 | 131024.2 | 4.2  | 17.3 | 1.1  | 0.7 | 2.2  | 0.1 | 1.9 | 0.9 | 519.5  | 9.6  | 518.9  | 9.0  | 516.2  | 23.5  |
| K09-13-5-2.1  | 112.7 | 26747.2  | 1.8  | 17.0 | 2.3  | 0.7 | 3.0  | 0.1 | 1.9 | 0.6 | 521.2  | 9.7  | 527.4  | 12.4 | 554.4  | 50.3  |
| K09-13-5-3.5  | 122.1 | 63214.3  | 5.9  | 16.8 | 2.5  | 0.7 | 5.6  | 0.1 | 5.0 | 0.9 | 549.4  | 26.6 | 557.0  | 24.1 | 588.5  | 53.2  |
| K09-13-5-6.4  | 38.6  | 28115.0  | 0.9  | 15.3 | 4.4  | 1.2 | 4.8  | 0.1 | 2.1 | 0.4 | 806.6  | 15.9 | 800.7  | 26.9 | 784.2  | 91.9  |
| K09-13-5-1.4  | 505.2 | 354313.4 | 1.7  | 8.8  | 0.5  | 5.1 | 4.2  | 0.3 | 4.2 | 1.0 | 1817.0 | 65.8 | 1833.7 | 35.5 | 1852.7 | 8.7   |
| K09-13-5-6.1  | 71.2  | 74220.1  | 1.5  | 8.8  | 0.9  | 5.0 | 4.7  | 0.3 | 4.6 | 1.0 | 1777.8 | 72.1 | 1813.7 | 40.0 | 1855.1 | 17.0  |
| K09-13-5-5.9  | 187.8 | 259059.9 | 1.1  | 8.8  | 0.3  | 5.3 | 2.2  | 0.3 | 2.2 | 1.0 | 1876.4 | 35.5 | 1867.7 | 18.8 | 1858.0 | 5.0   |
| K09-13-5-1.7  | 174.0 | 40044.6  | 1.3  | 8.7  | 0.6  | 5.4 | 3.1  | 0.3 | 3.1 | 1.0 | 1899.3 | 50.6 | 1887.8 | 26.8 | 1875.2 | 10.2  |

**Table S2. Zircon and perovskite U/Pb isotopic data and calculated dates. (separate Excel file)**
